# Supplementary material for: Defaunation precipitates the extinction of evolutionarily distinct interactions in the Anthropocene
Source: PubMed Central journal article supplement — Sci Adv. 2019 Jun 19;5(6):eaav6699. doi: 10.1126/sciadv.aav6699 (PMC6584213; doi:10.1126/sciadv.aav6699), 2019-06-19
Supplement: aav6699_SM.pdf [file aav6699_SM.pdf]

## Supplementary Materials for

### **Defaunation precipitates the extinction of evolutionarily distinct interactions in the Anthropocene**

Carine Emer\*, Mauro Galetti, Marco A. Pizo, Pedro Jordano, Miguel Verdú,

\*Corresponding author. Email: c.emer09@gmail.com

Published 19 June 2019, *Sci. Adv.* **5**, eaav6699 (2019)

DOI: 10.1126/sciadv.aav6699

#### **This PDF file includes:**

Fig. S1. Distribution of the ED of the frugivore bird species in the gradient of defaunation across the fragments of the Atlantic Forest.

Fig. S2. Distribution of the ED of the bird-dispersed plant species in the gradient of defaunation across the fragments of the Atlantic Forest.

Fig. S3. Correlation between the ED and the traits of the species involved in seed dispersal interactions in the Atlantic Forest.

Fig. S4. Defaunation leads to a significant impoverishment of the cumulative EDi performed by bird seed dispersal across forest fragments.

Fig. S5. EDi promoted by bird seed dispersal decreases sharply along a gradient of defaunation.

Fig. S6. Defaunation leads to an impoverishment of seed dispersal interactions and their associated asymmetric relationships of EDi.

Table S1. Description of the dataset used in this study.

Table S2. Traits of the bird species recorded in the studied communities of the Atlantic Forest.

Table S3. Traits of the plant species recorded in the studied communities of the Atlantic Forest.

Table S4. The bird–seed dispersal interactions recorded in the studied sites of the Atlantic Forest, followed by their EDi and correspondent asymmetry.

References (52–76)

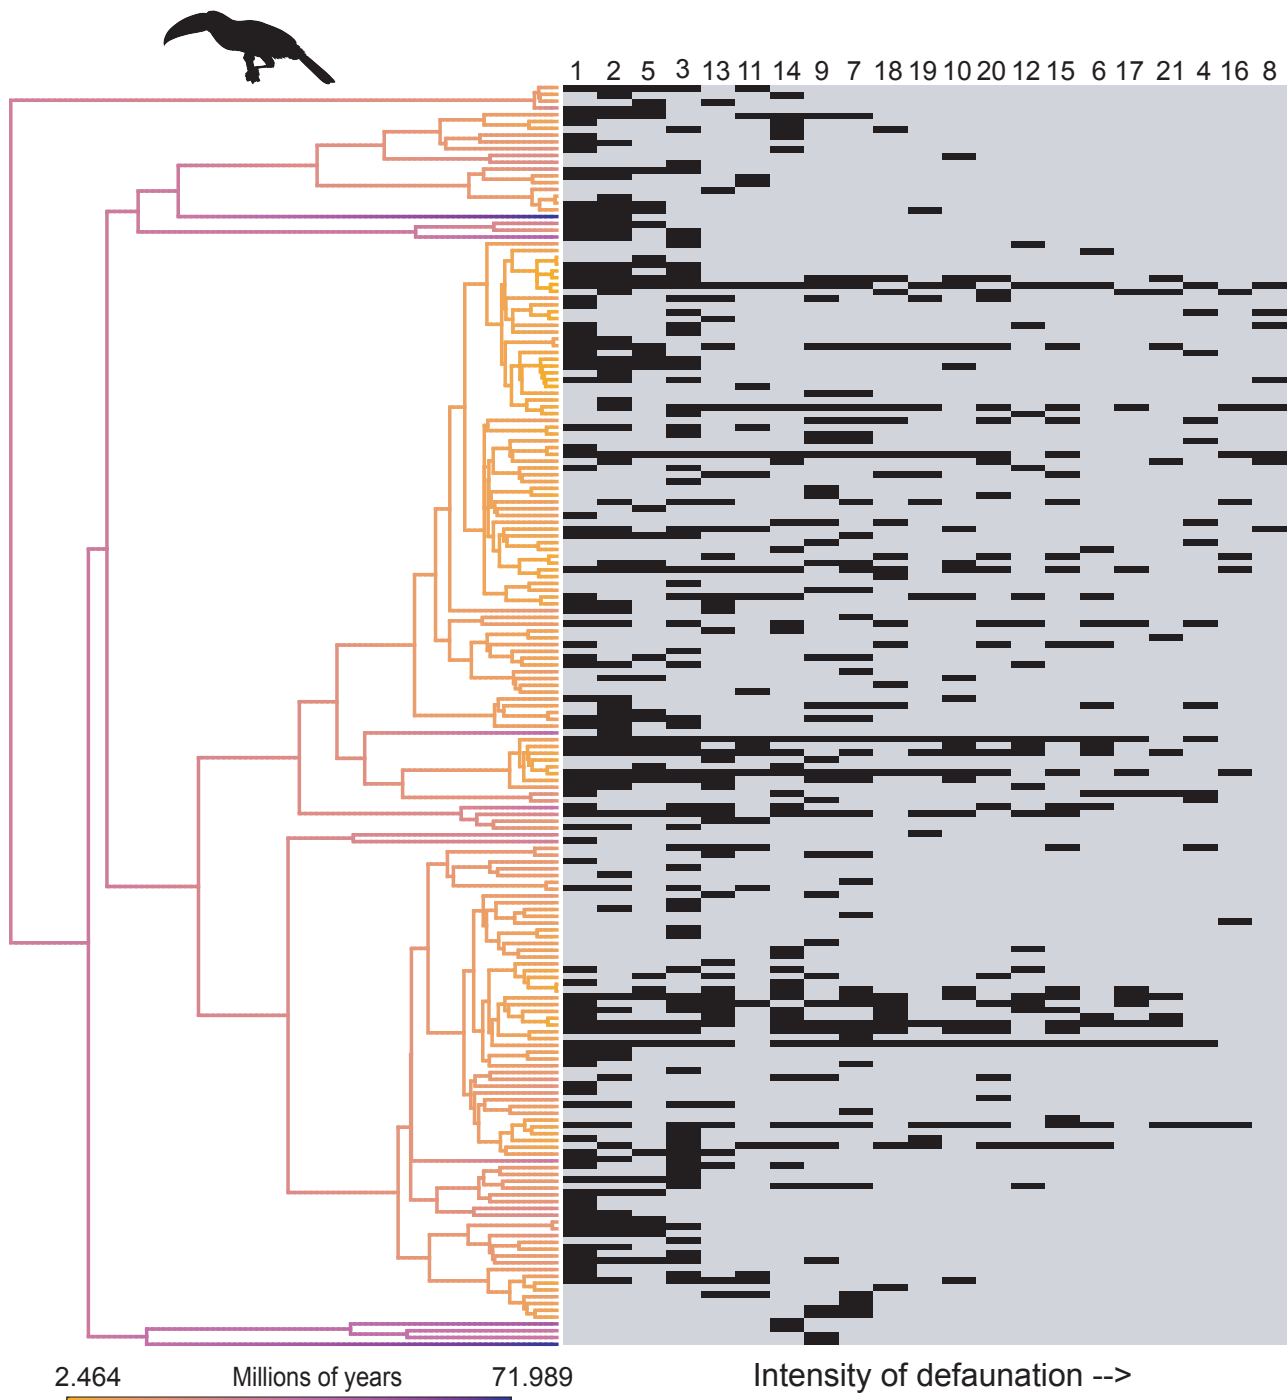

**Fig. S1. Distribution of the ED of the frugivore bird species in the gradient of defaunation across the fragments of the Atlantic Forest.** The left pane represents the ED of the bird species mapped in their correspondent phylogenetic tree. The right pane indicates in which fragment (columns in grey) a given bird species, and its corresponding ED, was recorded (black rectangles).

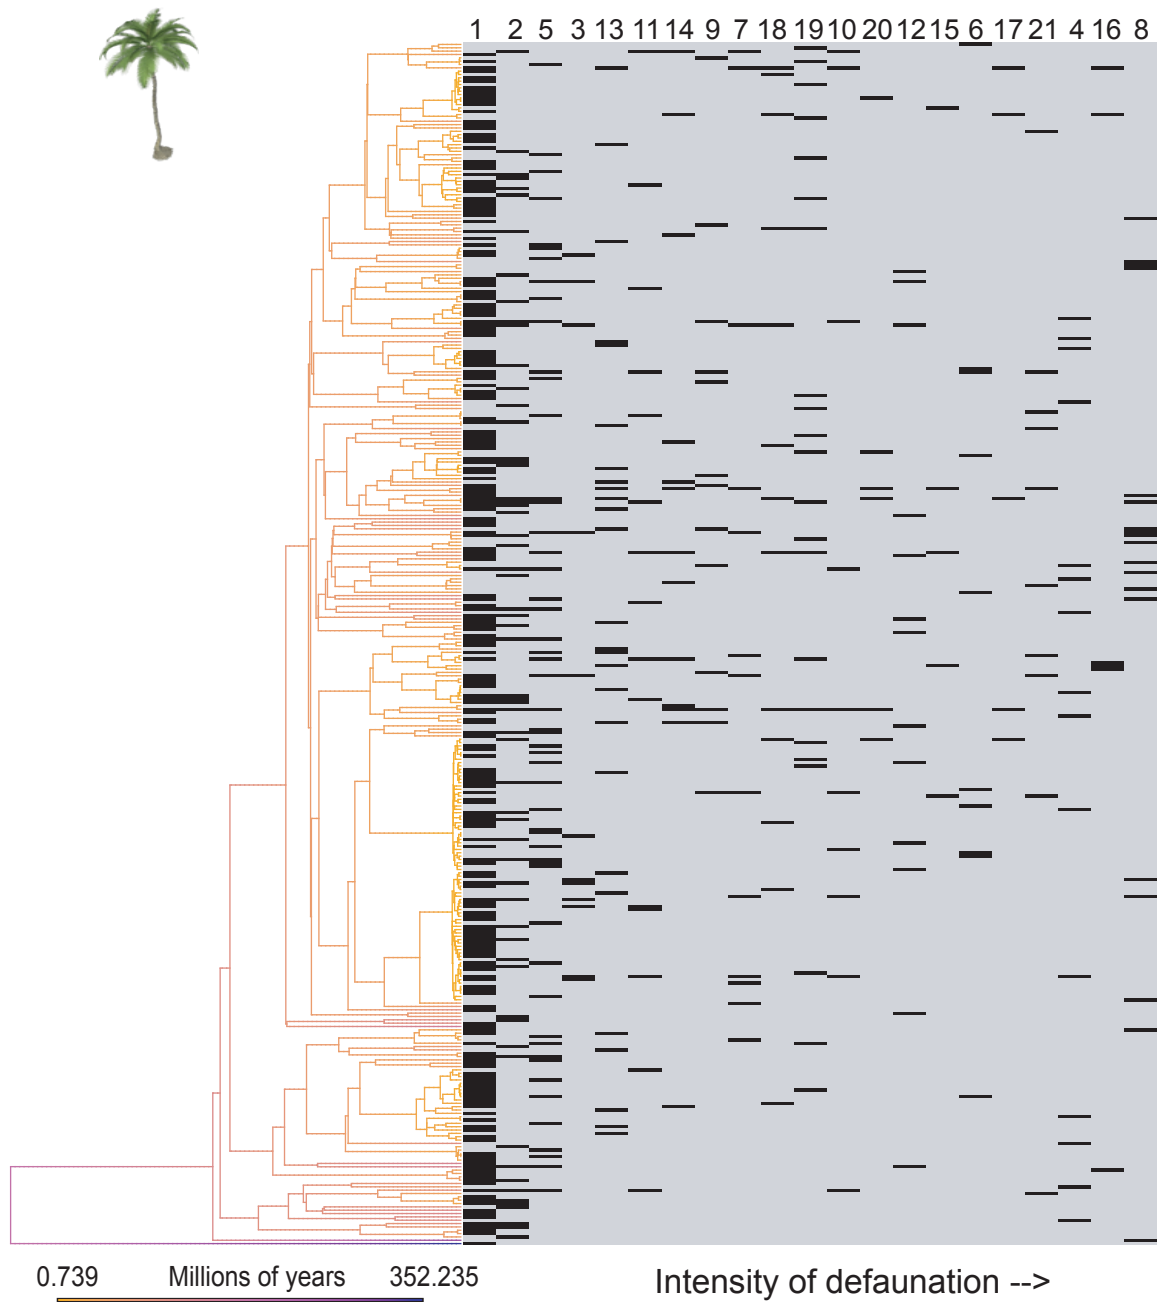

**Fig. S2. Distribution of the ED of the bird-dispersed plant species in the gradient of defaunation across the fragments of the Atlantic Forest.** The left pane represents the ED of the plant species mapped in their correspondent phylogenetic tree. The right pane indicates in which fragment (columns) a given plant species, and its corresponding ED, was recorded.

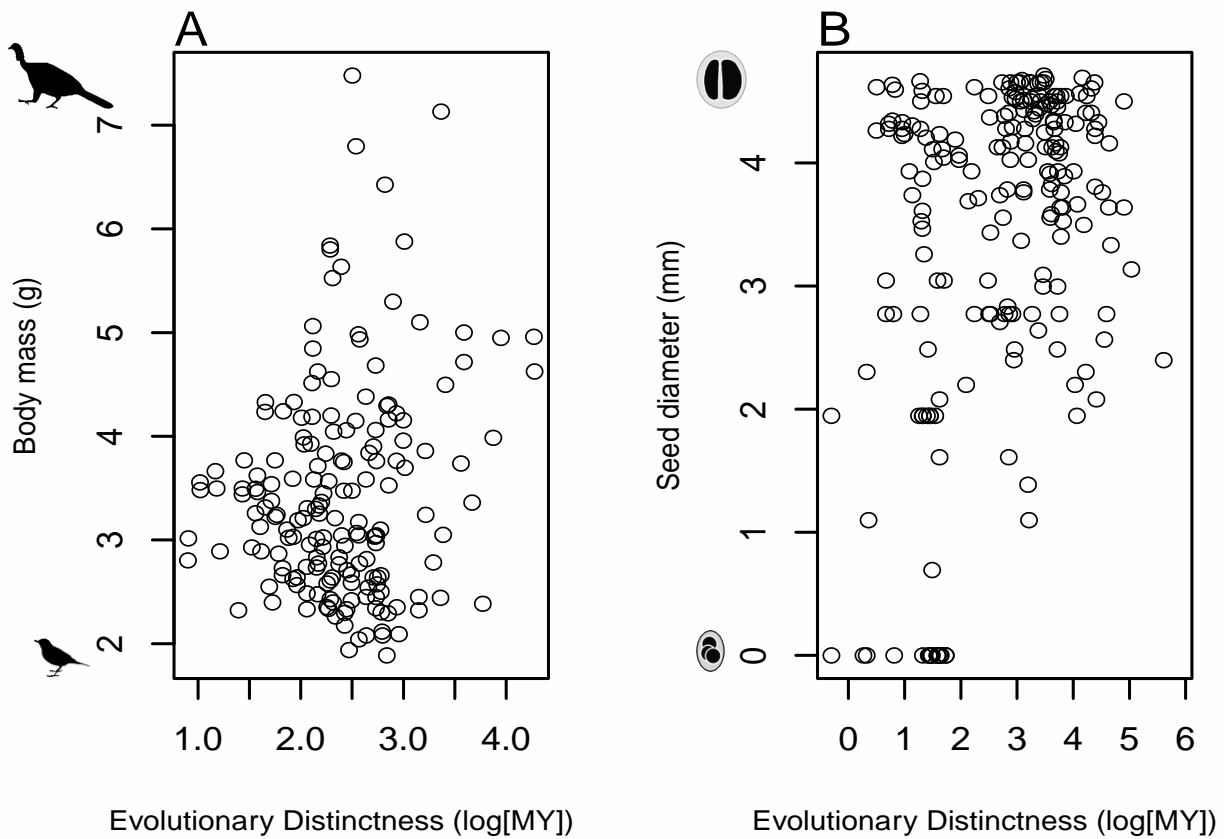

**Fig. S3. Correlation between the ED and the traits of the species involved in seed dispersal interactions in the Atlantic Forest.** ED is positively associated to increasing body mass of the frugivore bird species ( $r = 0.21$ ,  $t = 0.28$ ,  $p = 0.007$ ; **A**) and the seed diameter of the bird-dispersed plant species ( $r = 0.38$ ,  $t = 5.84$ ,  $p = 0.001$ ; **B**).

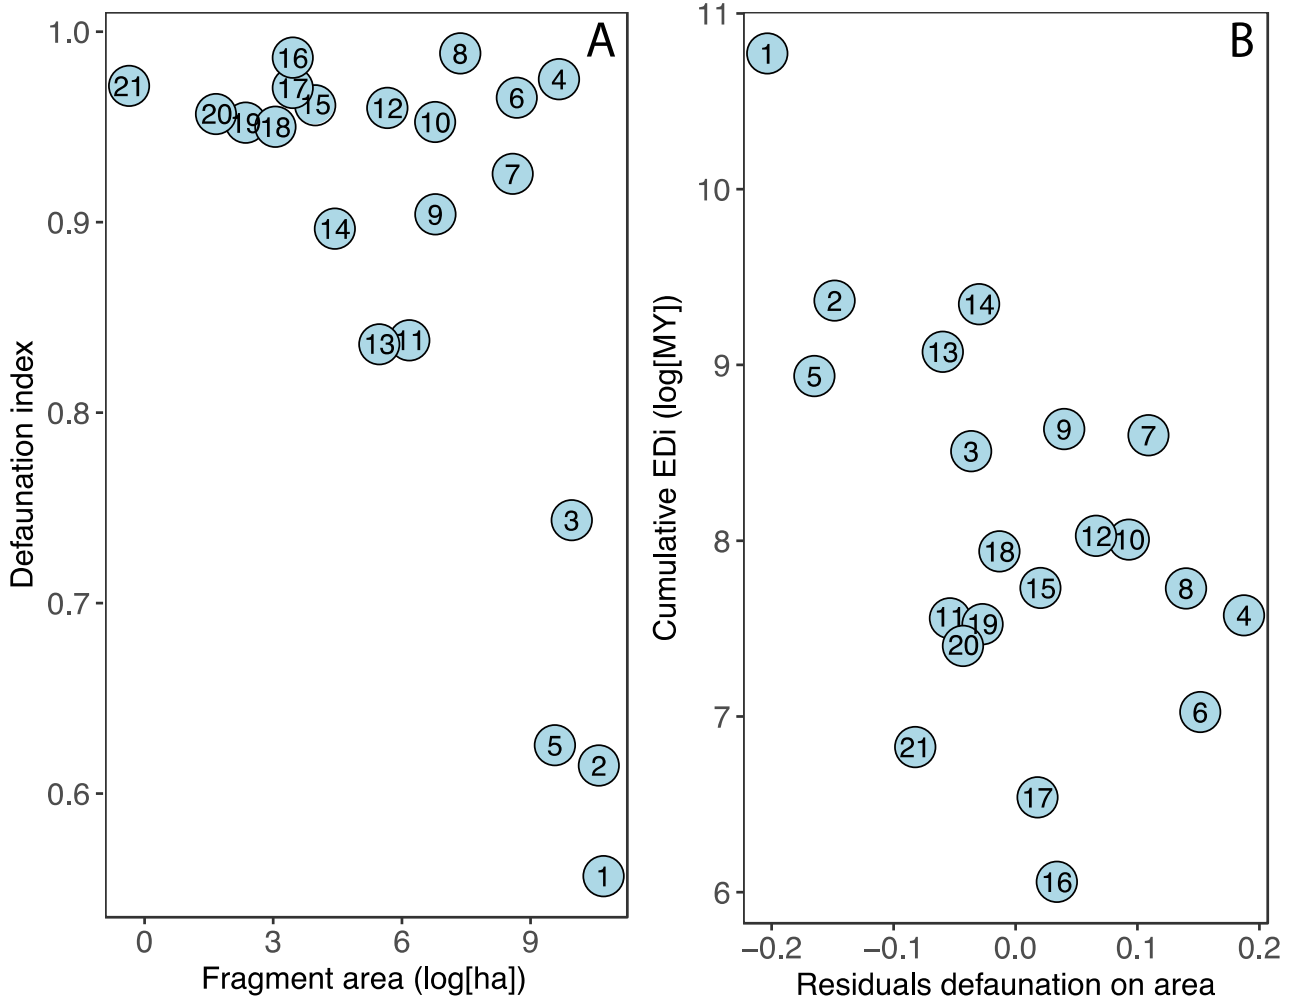

**Fig. S4. Defaunation leads to a significant impoverishment of the cumulative EDi performed by bird seed dispersal across forest fragments.** The sum of EDi each fragment support decreases drastically with defaunation, here estimated by the magnitude of the downsizing in body masses of all frugivorous bird species recorded in each local fragment in comparison to the regional pool of frugivorous bird species. Given that defaunation is negatively correlated with the area of the fragment ( $r = -0.63$ ,  $p < 0.001$ ; A), we tested whether this correlation would influence the patterns seen with the defaunation index by removing the area effects on EDi using the residuals of a linear regression of defaunation index on fragment area as the independent variable fitted against EDi (B). We found that the total EDi each fragment harbors decreases significantly with increasing defaunation even when the area of the fragment is taking into account (slope =  $-5.44 \pm 2.09$ ,  $t = -2.63$ ,  $p = 0.02$ ; B) Numbers within circles are in a decreasing order of fragment area, according to the full description of each site in Table S1. Larger area fragments tend to be less disturbed therefore holding more pristine forests.

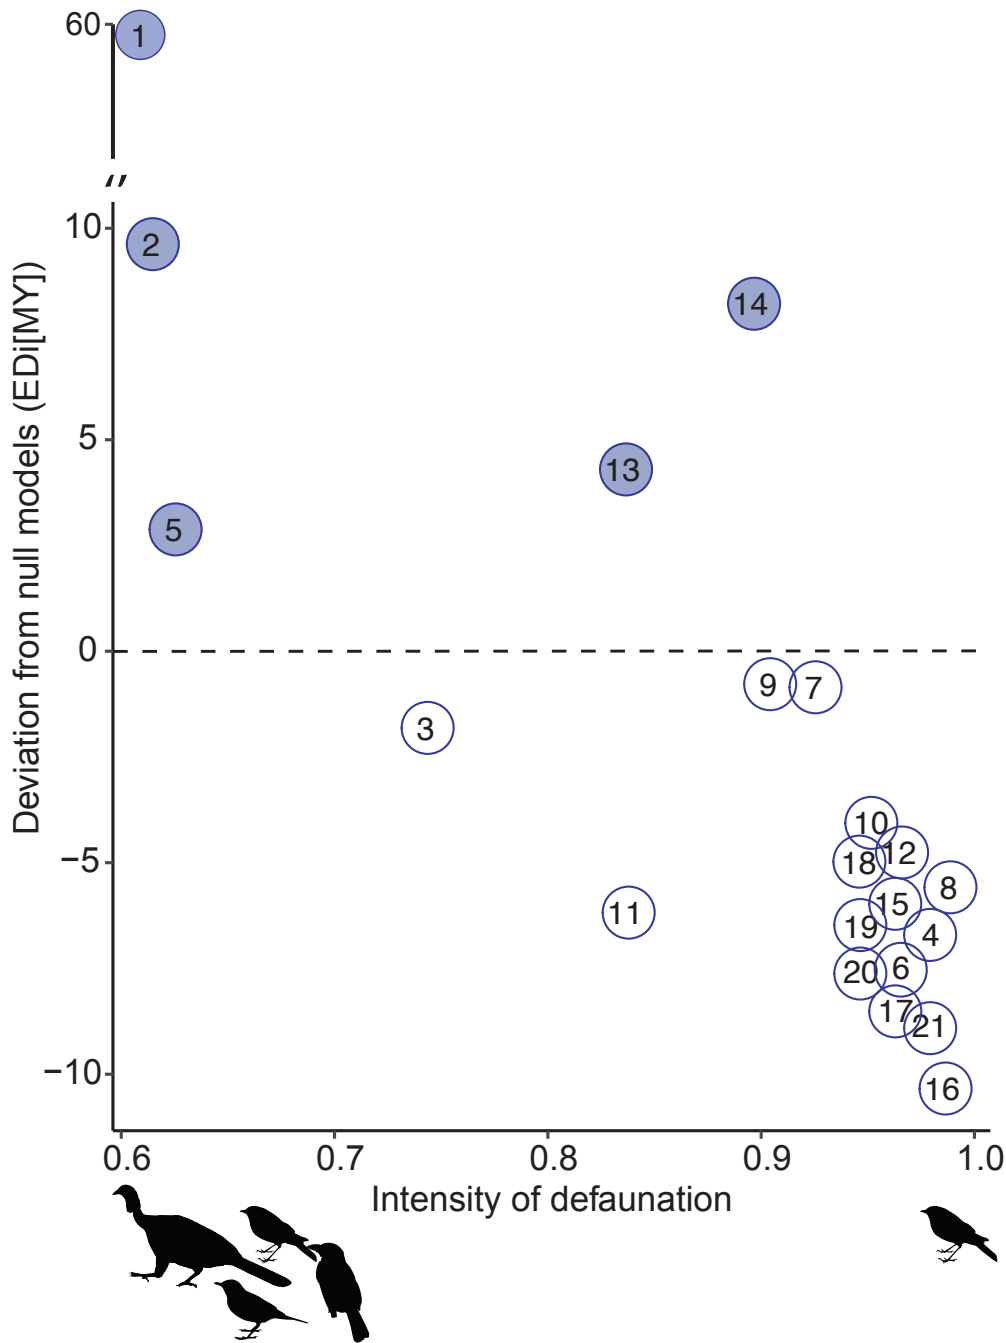

**Fig. S5. EDi promoted by bird seed dispersal decreases sharply along a gradient of defaunation.** The cumulative EDi a fragment carries corresponds to the sum of the EDIs of all interactions recorded in that fragment, here the sum of the EDIs of all seed-dispersal interactions by birds. The y-axis represents the z-scores of EDi's when controlled by null models that consider the bird-seed dispersal interaction richness in each fragment. Therefore, fragments with positive z-scores (shaded points above the zero line) are fragments that hold higher EDi than expected by the interaction richness it holds. Contrarily, negative z-scores are those fragments that carry less EDi than expected by its interaction richness. The most pristine area is the top-left circle (1), which is the largest remnant of the Atlantic Forest and also the least defaunated fragment, used here as the baseline to illustrate the position of a “pristine” forest. Numbers within circles are presented in a decreasing order of fragment area, according to the description of each site in Table S1. Larger fragments tend to be less disturbed, therefore harbouring forests closer to the most “pristine”, best preserved extreme.

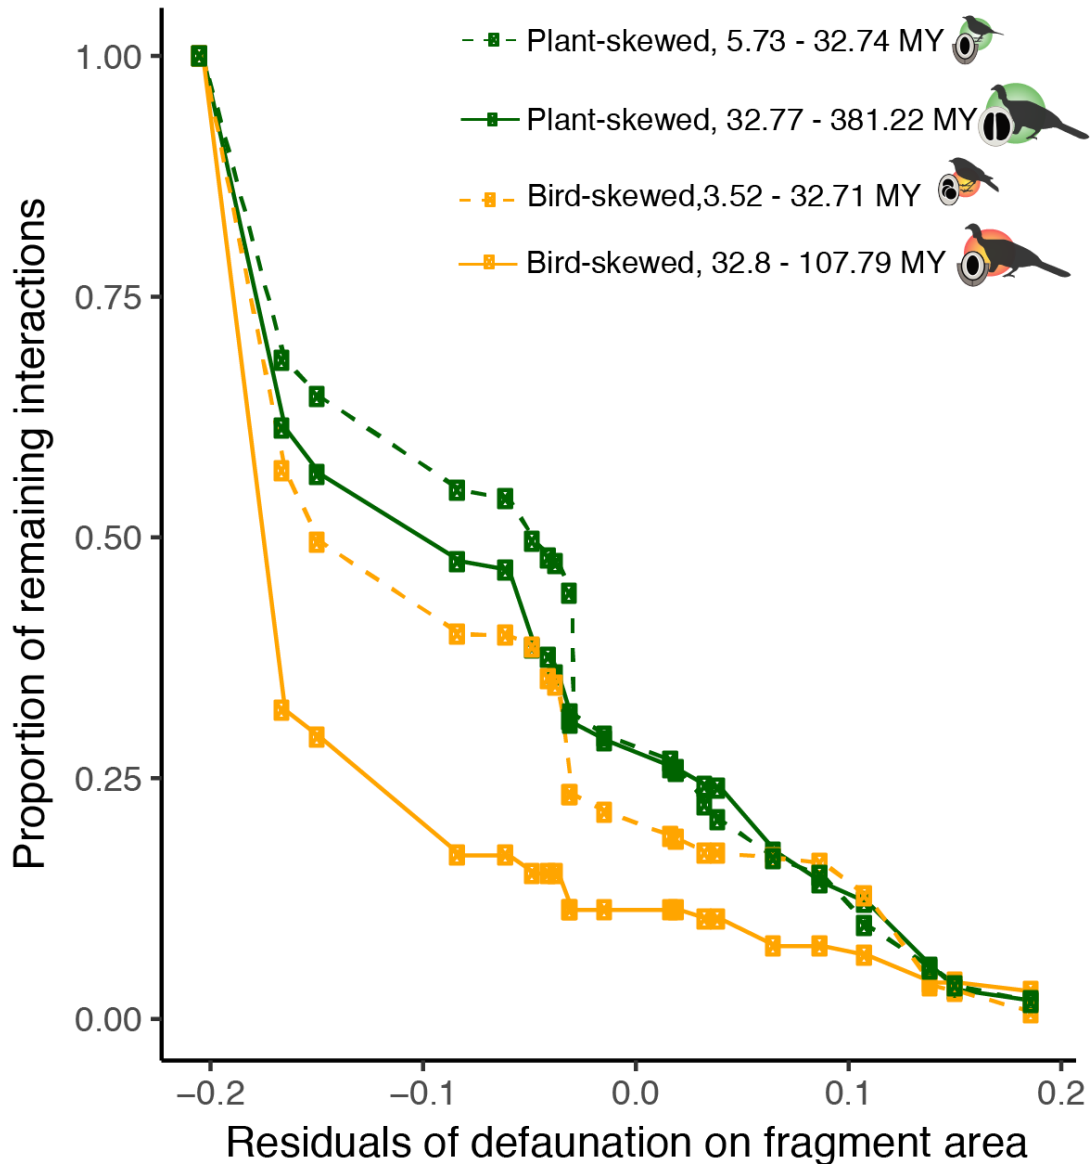

**Fig. S6. Defaunation leads to an impoverishment of seed dispersal interactions and their associated asymmetric relationships of EDi.** The proportion of interactions remaining in each fragment drops drastically as defaunation increases, and this pattern is maintained when controlled for fragment area by using the residuals of a linear regression of defaunation on fragment area as the independent variable. The four types of bird-seed dispersal interaction asymmetries showed similar trend on losing EDi with defaunation, but the loss is faster for bird-skewed interactions while plant-skewed interactions persist longer in the gradient of defaunation. The percentile 50 was used as a threshold to define low and high EDi's, which corresponds to different combinations of asymmetry as follows: Plant-skewed, low ED (min EDi = 5.73 MY; max EDi = 32.74 MY); Plant-skewed, high ED (32.77-381.22 MY); Bird-skewed, low ED (3.52 -32.71 MY); Bird-skewed, high ED (32.8 - 107.79 MY).

**Table S1.** Description of the dataset used in this study. All studies were carried out in the domain of the Atlantic Forest. Defaunation is estimated as the difference between the sum of the body mass of all frugivorous bird species at the regional level (using the Atlantic Frugivory dataset as a baseline, 21) and the sum of body mass of frugivorous bird species recorded in each study site (local community). PE = State Park. PARNA = National Park. Rebio = Biological Reserve. Latitude and longitude coordinates are given in decimal degrees (WGS84). Sample focus is defined as: P = plant oriented, interactions based on focal observations; A = animal oriented, interactions based on diet analysis (e.g., faeces sampling). The raw data for the full dataset can be found on GitHub ([https://github.com/carineemer/Phylogenies\\_Seed\\_Dispersal](https://github.com/carineemer/Phylogenies_Seed_Dispersal)) and on the Atlantic-Frugivory database (21).

| ID | Ref*  | Study site         | Forest type      | Latitude   | Longitude  | Area (ha) | N plant species | N bird species | N interactions | Defaunation index | Sample focus |
|----|-------|--------------------|------------------|------------|------------|-----------|-----------------|----------------|----------------|-------------------|--------------|
| 1  | 52    | PE Intervalas      | Ombrophilous     | -24.316965 | -48.387175 | 42000     | 226             | 94             | 1124           | 0.557             | PA           |
| 2  | 53    | PE Carlos Botelho  | Ombrophilous     | -24.131389 | -47.949167 | 37644     | 61              | 78             | 286            | 0.615             | PA           |
| 3  | 54-60 | PARNA S. Órgãos    | Ombrophilous     | -22.4956   | -43.0736   | 20000     | 12              | 76             | 195            | 0.744             | PA           |
| 4  | 61    | PARNA Jurubatiba   | Restinga         | -22.2047   | -41.5005   | 14867     | 15              | 15             | 41             | 0.975             | A            |
| 5  | 62    | PE Ilha do Cardoso | Ombrophilous     | -25.127786 | -47.957463 | 13500     | 52              | 45             | 185            | 0.626             | P            |
| 6  | 63    | Reserva Itapua     | Restinga         | -30.3808   | -51.0081   | 5556      | 10              | 17             | 43             | 0.965             | PA           |
| 7  | 64    | Rebio Poço Antas   | Ombrophilous     | -22.53629  | -42.277658 | 5052      | 13              | 43             | 181            | 0.926             | P            |
| 8  | 65    | PE Ibitipoca       | Rupestrian       | -21.709    | -43.884    | 1488      | 19              | 8              | 42             | 0.989             | A            |
| 9  | 66    | Reserva Comboios   | Restinga         | -19.774    | -40.0432   | 833       | 13              | 43             | 122            | 0.904             | P            |
| 10 | 67    | PE Ilha Anchieta   | Ombrophilous     | -23.548369 | -45.062541 | 828       | 10              | 25             | 104            | 0.958             | P            |
| 11 | 68    | fragment MG        | Semideciduous    | -20.802611 | -42.858746 | 380       | 15              | 26             | 64             | 0.838             | P            |
| 12 | 69    | Araucaria Forest   | Araucaria Forest | -28.223141 | -51.166857 | 272       | 13              | 21             | 54             | 0.96              | P            |
| 13 | 70    | Mata Sta Genebra   | Semideciduous    | -22.818101 | -47.113757 | 250       | 26              | 44             | 155            | 0.837             | P            |
| 14 | 71    | Itatiba            | Semideciduous    | -22.943263 | -46.749949 | 80        | 13              | 41             | 108            | 0.897             | PA           |
| 15 | 72    | fragment RC        | Semideciduous    | -22.480979 | -47.592293 | 44        | 5               | 24             | 62             | 0.963             | P            |
| 16 | 73    | restored 57        | Restored forest  | -22.671644 | -47.204638 | 30        | 6               | 9              | 15             | 0.986             | PA           |
| 17 | 73    | restored 15        | Restored forest  | -22.825234 | -47.427761 | 30        | 5               | 12             | 20             | 0.971             | PA           |
| 18 | 73    | restored 25        | Restored forest  | -22.568342 | -47.504987 | 20        | 13              | 27             | 88             | 0.95              | PA           |
| 19 | 74    | fragment SP        | Semideciduous    | -23.545856 | -46.721177 | 10        | 22              | 19             | 59             | 0.952             | P            |
| 20 | 75    | restored 8         | Restored forest  | -22.708708 | -47.610207 | 6         | 6               | 26             | 48             | 0.956             | P            |
| 21 | 76    | fragment RJ        | Semideciduous    | -22.767379 | -43.694394 | 0.66      | 11              | 13             | 26             | 0.971             | P            |

\*Numbers correspond to the references listed in the main text.



**Table S2. Traits of the bird species recorded in the studied communities of the Atlantic Forest.**  
ED = Evolutionary distinctness of the species, estimated in millions of years (MY) and averaged across 100 solved trees. Species are sorted in a decreasing order of ED.

| <b>Bird species</b>               | <b>Body mass (g)</b> | <b>ED (MY)</b> | <b>Fragments present</b> |
|-----------------------------------|----------------------|----------------|--------------------------|
| <i>Piaya cayana</i>               | 102.00               | 71.99          | 1                        |
| <i>Baryphthengus ruficapillus</i> | 142.5                | 71.54          | 2                        |
| <i>Guira guira</i>                | 141.00               | 51.93          | 1                        |
| <i>Trogon rufus</i>               | 53.80                | 48.17          | 3                        |
| <i>Troglodytes aedon</i>          | 10.86                | 43.50          | 1                        |
| <i>Cyclarhis gujanensis</i>       | 28.80                | 39.18          | 7                        |
| <i>Crotophaga major</i>           | 148.50               | 36.21          | 1                        |
| <i>Crotophaga ani</i>             | 111.73               | 36.21          | 1                        |
| <i>Oxyruncus cristatus</i>        | 42.00                | 35.16          | 3                        |
| <i>Trogon viridis</i>             | 89.70                | 30.23          | 3                        |
| <i>Thamnophilus caerulescens</i>  | 21.10                | 29.56          | 1                        |
| <i>Pipile jacutinga</i>           | 1250.00              | 28.99          | 3                        |
| <i>Cranioleuca pallida</i>        | 11.50                | 28.82          | 1                        |
| <i>Vireo olivaceus</i>            | 16.17                | 26.87          | 12                       |
| <i>Schiffornis virescens</i>      | 25.60                | 24.95          | 2                        |
| <i>Laniisoma elegans</i>          | 47.40                | 24.86          | 1                        |
| <i>Selenidera maculirostris</i>   | 164.00               | 23.57          | 4                        |
| <i>Picumnus cirratus</i>          | 10.20                | 23.33          | 1                        |
| <i>Picumnus nebulosus</i>         | 11.60                | 23.33          | 1                        |
| <i>Veniliornis spilogaster</i>    | 40.30                | 20.38          | 2                        |
| <i>Pyroderus scutatus</i>         | 357.00               | 20.26          | 3                        |
| <i>Mimus saturninus</i>           | 63.70                | 20.05          | 6                        |
| <i>Mimus gilvus</i>               | 52.35                | 20.05          | 2                        |
| <i>Conopias trivirgatus</i>       | NA                   | 19.91          | 1                        |
| <i>Camptostoma obsoletum</i>      | 8.10                 | 19.23          | 4                        |
| <i>Myiopagis caniceps</i>         | 10.50                | 18.83          | 1                        |
| <i>Tityra inquisitor</i>          | 43.10                | 18.77          | 1                        |
| <i>Tityra cayana</i>              | 68.10                | 18.77          | 3                        |
| <i>Procnias nudicollis</i>        | 200.00               | 18.15          | 5                        |
| <i>Habia rubica</i>               | 34.00                | 17.41          | 3                        |
| <i>Carpornis cucullata</i>        | 74.20                | 17.38          | 4                        |
| <i>Carpornis melanocephala</i>    | 64.20                | 17.38          | 3                        |
| <i>Myiophobus fasciatus</i>       | 9.90                 | 17.30          | 2                        |
| <i>Trogon surrucura</i>           | 73.30                | 17.14          | 3                        |
| <i>Serpophaga subcristata</i>     | 6.60                 | 17.09          | 1                        |
| <i>Ramphastos toco</i>            | 618.00               | 16.78          | 1                        |
| <i>Phyllomyias griseocapilla</i>  | 8.00                 | 16.39          | 1                        |
| <i>Phylloscartes ventralis</i>    | 8.30                 | 16.31          | 1                        |
| <i>Phylloscartes oustaleti</i>    | 10.00                | 16.18          | 1                        |
| <i>Tolmomyias flaviventris</i>    | 12.20                | 16.12          | 3                        |
| <i>Tolmomyias sulphurescens</i>   | 14.30                | 16.12          | 5                        |
| <i>Legatus leucophaeus</i>        | 22.20                | 16.06          | 2                        |

|                                   |         |       |    |
|-----------------------------------|---------|-------|----|
| <i>Neopelma aurifrons</i>         | 140.00  | 15.62 | 1  |
| <i>Geothlypis aequinoctialis</i>  | 13.10   | 15.54 | 1  |
| <i>Pachyramphus viridis</i>       | 21.00   | 15.43 | 1  |
| <i>Pachyramphus validus</i>       | 43.00   | 15.43 | 4  |
| <i>Hylophilus amaurocephalus</i>  | 11.59   | 15.40 | 2  |
| <i>Pachyramphus polychopterus</i> | 20.80   | 15.37 | 5  |
| <i>Pachyramphus castaneus</i>     | 19.50   | 15.37 | 4  |
| <i>Hylophilus poicilotis</i>      | 10.40   | 15.36 | 3  |
| <i>Melanerpes flavifrons</i>      | 58.00   | 15.33 | 2  |
| <i>Melanerpes candidus</i>        | 108.00  | 15.33 | 2  |
| <i>Zonotrichia capensis</i>       | 20.75   | 15.12 | 10 |
| <i>Turdus subalaris</i>           | 49.50   | 14.99 | 4  |
| <i>Chlorophonia cyanea</i>        | 14.00   | 14.98 | 2  |
| <i>Phibalura flavirostris</i>     | 46.50   | 14.37 | 2  |
| <i>Ilicura militaris</i>          | 12.70   | 14.28 | 3  |
| <i>Manacus manacus</i>            | 16.70   | 14.03 | 3  |
| <i>Phylloscartes sylviolus</i>    | 8.00    | 14.00 | 1  |
| <i>Contopus cinereus</i>          | 11.60   | 13.98 | 1  |
| <i>Icterus cayanensis</i>         | 36.00   | 13.95 | 5  |
| <i>Tijuca atra</i>                | 80.00   | 13.92 | 1  |
| <i>Celeus flavescens</i>          | 139.00  | 13.12 | 7  |
| <i>Nemosia pileata</i>            | 16.00   | 13.07 | 6  |
| <i>Capsiempis flaveola</i>        | 7.70    | 13.01 | 1  |
| <i>Elaenia obscura</i>            | 23.90   | 13.01 | 4  |
| <i>Fluvicola nengeta</i>          | 21.00   | 12.98 | 1  |
| <i>Pteroglossus bailloni</i>      | 146.00  | 12.96 | 3  |
| <i>Satrapa icterophrys</i>        | 21.50   | 12.73 | 1  |
| <i>Penelope superciliaris</i>     | 895.00  | 12.66 | 2  |
| <i>Pitangus sulphuratus</i>       | 63.33   | 12.60 | 18 |
| <i>Penelope obscura</i>           | 1770.00 | 12.21 | 5  |
| <i>Sirystes sibilator</i>         | 32.30   | 12.17 | 1  |
| <i>Mionectes rufiventris</i>      | 13.30   | 12.11 | 4  |
| <i>Mionectes oleagineus</i>       | 11.23   | 12.11 | 1  |
| <i>Euphonia pectoralis</i>        | 14.40   | 12.06 | 3  |
| <i>Parula pitaiayumi</i>          | 6.95    | 11.82 | 3  |
| <i>Euphonia violacea</i>          | 15.00   | 11.60 | 6  |
| <i>Phyllomyias fasciatus</i>      | 10.30   | 11.55 | 4  |
| <i>Turdus amaurochalinus</i>      | 57.90   | 11.52 | 18 |
| <i>Euphonia chalybea</i>          | 19.00   | 11.36 | 3  |
| <i>Volatinia jacarina</i>         | 9.95    | 11.35 | 4  |
| <i>Conirostrum speciosum</i>      | 8.80    | 11.33 | 7  |
| <i>Attila phoenicurus</i>         | 32.30   | 11.24 | 2  |
| <i>Attila rufus</i>               | 42.60   | 11.24 | 2  |
| <i>Pipraeidea melanonota</i>      | 21.00   | 11.01 | 6  |
| <i>Myiodynastes maculatus</i>     | 43.20   | 11.01 | 13 |
| <i>Psarocolius decumanus</i>      | 280.00  | 10.96 | 1  |
| <i>Haplospiza unicolor</i>        | 15.90   | 10.74 | 1  |

|                                  |        |       |    |
|----------------------------------|--------|-------|----|
| <i>Sicalis flaveola</i>          | 17.00  | 10.74 | 1  |
| <i>Machaeropterus regulus</i>    | 9.60   | 10.37 | 1  |
| <i>Arremon taciturnus</i>        | 24.80  | 10.32 | 1  |
| <i>Xolmis velatus</i>            | NA     | 10.18 | 2  |
| <i>Xolmis cinereus</i>           | 57.10  | 10.18 | 1  |
| <i>Euphonia chlorotica</i>       | 11.00  | 10.12 | 6  |
| <i>Pteroglossus aracari</i>      | 251.00 | 10.07 | 1  |
| <i>Cyanerpes cyaneus</i>         | 14.00  | 10.04 | 3  |
| <i>Lipaugus lanioides</i>        | 94.80  | 9.95  | 2  |
| <i>Megarynchus pitangua</i>      | 66.70  | 9.93  | 10 |
| <i>Ramphastos sp</i>             | NA     | 9.87  | 1  |
| <i>Cnemotriccus fuscatus</i>     | 13.60  | 9.85  | 1  |
| <i>Lathrotriccus euleri</i>      | 11.35  | 9.85  | 2  |
| <i>Ramphastos dicolorus</i>      | 331.00 | 9.85  | 4  |
| <i>Ramphastos vitellinus</i>     | 343.50 | 9.83  | 3  |
| <i>Euphonia sp</i>               | NA     | 9.81  | 2  |
| <i>Stephanophorus diadematus</i> | 35.40  | 9.70  | 4  |
| <i>Coereba flaveola</i>          | 10.34  | 9.68  | 12 |
| <i>Basileuterus flaveolus</i>    | 13.20  | 9.55  | 1  |
| <i>Basileuterus culicivorus</i>  | 10.50  | 9.55  | 1  |
| <i>Saltator maximus</i>          | 46.20  | 9.42  | 2  |
| <i>Orchesticus abeillei</i>      | 31.50  | 9.22  | 2  |
| <i>Antilophia galeata</i>        | 20.60  | 9.20  | 1  |
| <i>Tachyphonus cristatus</i>     | 18.80  | 9.14  | 5  |
| <i>Tersina viridis</i>           | 29.00  | 9.03  | 5  |
| <i>Penelope sp</i>               | NA     | 8.85  | 2  |
| <i>Myiozetetes similis</i>       | 28.00  | 8.85  | 11 |
| <i>Myiozetetes cayanensis</i>    | 25.90  | 8.85  | 1  |
| <i>Orthogonys chloricterus</i>   | 16.00  | 8.77  | 2  |
| <i>Cacicus haemorrhous</i>       | 102.00 | 8.72  | 4  |
| <i>Cacicus chrysopterus</i>      | 41.00  | 8.72  | 4  |
| <i>Poospiza thoracica</i>        | 11.90  | 8.71  | 1  |
| <i>Thlypopsis sordida</i>        | 17.00  | 8.63  | 5  |
| <i>Knipolegus cyanirostris</i>   | 15.40  | 8.62  | 1  |
| <i>Knipolegus nigerrimus</i>     | 20.30  | 8.62  | 1  |
| <i>Empidonomus varius</i>        | 27.10  | 8.55  | 8  |
| <i>Thraupis bonariensis</i>      | 36.00  | 8.40  | 1  |
| <i>Colaptes campestris</i>       | 158.00 | 8.31  | 2  |
| <i>Colaptes melanochloros</i>    | 127.27 | 8.31  | 3  |
| <i>Gnorimopsar chopi</i>         | 65.90  | 8.26  | 1  |
| <i>Pseudoleistes guirahuro</i>   | 91.20  | 8.26  | 2  |
| <i>Saltator maxillosus</i>       | 50.80  | 8.15  | 1  |
| <i>Poospiza lateralis</i>        | 19.20  | 8.06  | 3  |
| <i>Elaenia sp</i>                | NA     | 7.97  | 11 |
| <i>Elaenia spectabilis</i>       | 27.30  | 7.87  | 1  |
| <i>Pipra rubrocapilla</i>        | 12.00  | 7.85  | 2  |
| <i>Pipra pipra</i>               | 10.30  | 7.85  | 2  |

|                                    |       |      |    |
|------------------------------------|-------|------|----|
| <i>Sporophila leucoptera</i>       | 15.50 | 7.82 | 1  |
| <i>Saltator fuliginosus</i>        | 50.50 | 7.64 | 3  |
| <i>Turdus albicollis</i>           | 54.00 | 7.59 | 8  |
| <i>Elaenia flavogaster</i>         | 24.80 | 7.58 | 15 |
| <i>Turdus flavipes</i>             | 65.33 | 7.46 | 8  |
| <i>Trichothraupis melanops</i>     | 24.30 | 7.19 | 7  |
| <i>Dacnis nigripes</i>             | 14.00 | 7.12 | 1  |
| <i>Dacnis cayana</i>               | 13.00 | 7.12 | 16 |
| <i>Cissopis leverianus</i>         | 76.00 | 6.92 | 1  |
| <i>Tangara cyanoptera</i>          | 20.70 | 6.87 | 1  |
| <i>Elaenia parvirostris</i>        | 13.80 | 6.86 | 1  |
| <i>Myiarchus tyrannulus</i>        | 36.25 | 6.83 | 4  |
| <i>Turdus sp</i>                   | NA    | 6.70 | 2  |
| <i>Tangara mexicana</i>            | 20.50 | 6.57 | 2  |
| <i>Tangara peruviana</i>           | 22.20 | 6.47 | 3  |
| <i>Turdus rufiventris</i>          | 69.50 | 6.23 | 14 |
| <i>Coryphospingus cucullatus</i>   | 14.30 | 6.19 | 2  |
| <i>Coryphospingus pileatus</i>     | 15.30 | 6.19 | 2  |
| <i>Elaenia mesoleuca</i>           | 17.60 | 5.96 | 3  |
| <i>Chiroxiphia caudata</i>         | 25.60 | 5.85 | 6  |
| <i>Myiarchus swainsoni</i>         | 25.10 | 5.77 | 4  |
| <i>Saltator similis</i>            | 43.30 | 5.75 | 9  |
| <i>Hemithraupis ruficapilla</i>    | 11.00 | 5.61 | 4  |
| <i>Tachyphonus rufus</i>           | 34.40 | 5.55 | 1  |
| <i>Tachyphonus coronatus</i>       | 29.30 | 5.55 | 14 |
| <i>Hemithraupis flavicollis</i>    | 12.80 | 5.44 | 3  |
| <i>Turdus fumigatus</i>            | 75.85 | 5.24 | 2  |
| <i>Myiarchus ferox</i>             | 27.50 | 5.23 | 7  |
| <i>Turdus leucomelas</i>           | 69.10 | 5.22 | 16 |
| <i>Thraupis sp</i>                 | NA    | 5.10 | 1  |
| <i>Tangara cayana</i>              | 18.00 | 5.02 | 14 |
| <i>Tangara preciosa</i>            | 22.80 | 4.98 | 2  |
| <i>Myiarchus sp</i>                | NA    | 4.97 | 2  |
| <i>Tyrannus savana</i>             | 31.90 | 4.84 | 6  |
| <i>Tyrannus melancholicus</i>      | 37.40 | 4.84 | 16 |
| <i>Ramphocelus bresilius</i>       | 32.90 | 4.76 | 5  |
| <i>Ramphocelus carbo</i>           | 26.00 | 4.76 | 5  |
| <i>Tangara sp</i>                  | NA    | 4.69 | 1  |
| <i>Tangara seledon</i>             | 18.70 | 4.59 | 4  |
| <i>Thraupis cyanoptera</i>         | 43.30 | 4.26 | 4  |
| <i>Schistochlamys ruficapillus</i> | 31.20 | 4.19 | 3  |
| <i>Schistochlamys melanopsis</i>   | 33.00 | 4.19 | 1  |
| <i>Sporophila caerulescens</i>     | 10.20 | 4.03 | 2  |
| <i>Tangara cyanocephala</i>        | 18.00 | 3.37 | 5  |
| <i>Thraupis ornata</i>             | 33.00 | 3.26 | 3  |
| <i>Thraupis palmarum</i>           | 39.00 | 3.22 | 10 |
| <i>Thraupis sayaca</i>             | 32.50 | 2.78 | 16 |

|                             |       |      |   |
|-----------------------------|-------|------|---|
| <i>Thraupis episcopus</i>   | 35.00 | 2.77 | 6 |
| <i>Tangara desmaresti</i>   | 20.40 | 2.47 | 4 |
| <i>Tangara cyanoventris</i> | 16.50 | 2.46 | 1 |

---

**Table S3. Traits of the plant species recorded in the studied communities of the Atlantic Forest.**

ED = Evolutionary distinctness of the species, estimated in million of years (MY) averaged across 100 solved trees. Species are sorted in a decreasing order of ED.

| <b>Plant species</b>               | <b>Seed diameter (mm)</b> | <b>ED (MY)</b> | <b>Fragments present</b> |
|------------------------------------|---------------------------|----------------|--------------------------|
| <i>Podocarpus sellowii</i>         | NA                        | 352.23         | 1                        |
| <i>Hedyosmum brasiliense</i>       | 1.50                      | 273.14         | 1                        |
| <i>Meliosma sellowii</i>           | 11.6                      | 153.69         | 1                        |
| <i>Cinnamodendron dinisii</i>      | 7.00                      | 134.60         | 4                        |
| <i>Drimys brasiliensis</i>         | 2.00                      | 134.60         | 1                        |
| <i>Dichorisandra thyrsoiflora</i>  | NA                        | 120.28         | 1                        |
| <i>Hedychium coronarium</i>        | NA                        | 113.58         | 1                        |
| <i>Momordica charantia</i>         | NA                        | 110.30         | 1                        |
| <i>Smilax elastica</i>             | NA                        | 108.04         | 1                        |
| <i>Smilax rufescens</i>            | NA                        | 108.04         | 1                        |
| <i>Abuta selleana</i>              | 13.20                     | 106.80         | 1                        |
| <i>Cissampelos andromorpha</i>     | NA                        | 106.80         | 1                        |
| <i>Humiria balsamifera</i>         | 4.10                      | 103.70         | 1                        |
| <i>Fuchsia regia</i>               | NA                        | 102.89         | 1                        |
| <i>Hyeronima alchorneoides</i>     | 2.0                       | 102.73         | 3                        |
| <i>Cassytha filiformis</i>         | NA                        | 101.35         | 1                        |
| <i>Euterpe edulis</i>              | 12.00                     | 98.70          | 5                        |
| <i>Philodendron appendiculatum</i> | NA                        | 97.44          | 2                        |
| <i>Margaritaria nobilis</i>        | 1.75                      | 95.07          | 1                        |
| <i>Heisteria perianthomega</i>     | NA                        | 92.26          | 1                        |
| <i>Costus spiralis</i>             | NA                        | 91.96          | 1                        |
| <i>Samanea tubulosa</i>            | NA                        | 91.90          | 1                        |
| <i>Pera glabrata</i>               | 2.60                      | 91.62          | 3                        |
| <i>Chamissoa altissima</i>         | NA                        | 90.34          | 1                        |
| <i>Scutia buxifolia</i>            | NA                        | 89.66          | 1                        |
| <i>Ilex affinis</i>                | 5.50                      | 85.51          | 1                        |
| <i>Cissus paulliniifolia</i>       | NA                        | 82.78          | 1                        |
| <i>Vismia brasiliensis</i>         | 1.10                      | 82.46          | 1                        |
| <i>Merostachys sp</i>              | NA                        | 81.26          | 1                        |
| <i>Dendropanax cuneatus</i>        | 2.90                      | 80.53          | 1                        |
| <i>Sapium glandulosum</i>          | 5.00                      | 80.45          | 1                        |
| <i>Tetrorchidium rubrivenium</i>   | 4.50                      | 80.45          | 1                        |
| <i>Quiina glaziovii</i>            | 9.00                      | 79.72          | 3                        |
| <i>Melastomataceae sp</i>          | NA                        | 76.37          | 1                        |
| <i>Sloanea guianensis</i>          | 6.00                      | 75.38          | 2                        |
| <i>Sloanea hirsuta</i>             | 8.50                      | 75.38          | 2                        |
| <i>Cybianthus peruvianus</i>       | NA                        | 74.46          | 1                        |
| <i>Anthurium scandens</i>          | NA                        | 71.55          | 2                        |
| <i>Magnolia ovata</i>              | 8.00                      | 69.38          | 1                        |
| <i>Michelia champaca</i>           | NA                        | 69.38          | 1                        |
| <i>Casearia decandra</i>           | 6.00                      | 68.33          | 2                        |
| <i>Casearia sylvestris</i>         | 1.30                      | 68.33          | 7                        |

|                                  |       |       |   |
|----------------------------------|-------|-------|---|
| <i>Garcinia gardneriana</i>      | 14.80 | 65.91 | 1 |
| <i>Tournefortia sp</i>           | NA    | 64.29 | 1 |
| <i>Sorocea bonplandii</i>        | 9.80  | 64.25 | 2 |
| <i>Aechmea nudicaulis</i>        | NA    | 63.58 | 1 |
| <i>Aureliana fasciculata</i>     | NA    | 62.42 | 1 |
| <i>Tapirira guianensis</i>       | 8.15  | 61.33 | 1 |
| <i>Cissus striata</i>            | NA    | 60.78 | 1 |
| <i>Maclura tinctoria</i>         | 2.10  | 58.86 | 2 |
| <i>Schwartzia brasiliensis</i>   | 1.00  | 58.30 | 1 |
| <i>Prunus myrtifolia</i>         | 5.40  | 57.13 | 2 |
| <i>Prunus sellowii</i>           | NA    | 57.13 | 1 |
| <i>Coussapoa microcarpa</i>      | 1.20  | 56.42 | 2 |
| <i>Phytolacca dioica</i>         | 3.00  | 55.01 | 1 |
| <i>Henriettea saldanhae</i>      | NA    | 54.22 | 1 |
| <i>Piper corintoanum</i>         | NA    | 53.86 | 1 |
| <i>Davilla rugosa</i>            | NA    | 52.64 | 1 |
| <i>Heteropsis oblongifolia</i>   | NA    | 52.04 | 1 |
| <i>Monstera adansonii</i>        | NA    | 51.68 | 1 |
| <i>Heteropsis rigidifolia</i>    | NA    | 51.57 | 1 |
| <i>Codonanthe cordifolia</i>     | NA    | 50.33 | 1 |
| <i>Piper sp</i>                  | NA    | 49.90 | 2 |
| <i>Peplonia organensis</i>       | NA    | 48.19 | 1 |
| <i>Cryptocarya moschata</i>      | 8.00  | 47.82 | 2 |
| <i>Styrax leprosus</i>           | 5.50  | 47.09 | 1 |
| <i>Loranthaceae sp</i>           | NA    | 46.89 | 1 |
| <i>Cryptocarya aschersoniana</i> | 22.00 | 46.67 | 1 |
| <i>Cryptocarya mandioccana</i>   | 15.00 | 45.55 | 1 |
| <i>Urera baccifera</i>           | 2.00  | 45.09 | 2 |
| <i>Urera sp</i>                  | NA    | 45.09 | 1 |
| <i>Rubus brasiliensis</i>        | NA    | 44.80 | 1 |
| <i>Rubus sp</i>                  | NA    | 44.13 | 1 |
| <i>Cordia sellowiana</i>         | 13.31 | 43.86 | 1 |
| <i>Curatella americana</i>       | 2.60  | 43.84 | 1 |
| <i>Galium hypocarpium</i>        | NA    | 43.70 | 1 |
| <i>Cordia ecalyculata</i>        | 8.00  | 43.57 | 2 |
| <i>Cordia silvestris</i>         | 4.00  | 43.43 | 2 |
| <i>Schefflera angustissima</i>   | 2.00  | 43.27 | 2 |
| <i>Varronia curassavica</i>      | NA    | 42.92 | 1 |
| <i>Myriopus paniculatus</i>      | NA    | 42.82 | 1 |
| <i>Pourouma guianensis</i>       | 10.00 | 42.72 | 2 |
| <i>Annona neosericea</i>         | 3.70  | 42.49 | 3 |
| <i>Rubus rosifolius</i>          | NA    | 42.38 | 2 |
| <i>Rubus urticifolius</i>        | NA    | 42.38 | 2 |
| <i>Myrcia sp</i>                 | NA    | 42.26 | 1 |
| <i>Ouratea polygyna</i>          | NA    | 41.89 | 1 |
| <i>Ouratea vaccinioides</i>      | NA    | 41.89 | 1 |
| <i>Zanthoxylum hyemale</i>       | 3.00  | 41.59 | 1 |

|                                      |       |       |   |
|--------------------------------------|-------|-------|---|
| <i>Neomitranthes glomerata</i>       | 11.00 | 41.31 | 3 |
| <i>Celtis iguanaea</i>               | 6.50  | 41.20 | 1 |
| <i>Trema micrantha</i>               | 1.70  | 41.20 | 7 |
| <i>Aegiphila integrifolia</i>        | 7.00  | 41.04 | 5 |
| <i>Piper aduncum</i>                 | NA    | 41.03 | 2 |
| <i>Piper dilatatum</i>               | NA    | 41.03 | 1 |
| <i>Myrrhinium atropurpureum</i>      | NA    | 40.89 | 1 |
| <i>Maytenus littoralis</i>           | 8.00  | 40.56 | 1 |
| <i>Guapira opposita</i>              | 3.84  | 40.10 | 6 |
| <i>Schaefferia argentinensis</i>     | NA    | 39.94 | 1 |
| <i>Alchornea triplinervia</i>        | 4.10  | 39.83 | 5 |
| <i>Alchornea glandulosa</i>          | 5.00  | 39.08 | 3 |
| <i>Maytenus brasiliensis</i>         | 8.00  | 39.07 | 1 |
| <i>Maytenus gonoclada</i>            | 5.70  | 38.58 | 3 |
| <i>Citharexylum myrianthum</i>       | 5.50  | 38.57 | 7 |
| <i>Tabernaemontana catharinensis</i> | NA    | 38.51 | 1 |
| <i>Maytenus sp</i>                   | NA    | 38.43 | 2 |
| <i>Myrtaceae sp</i>                  | NA    | 38.00 | 1 |
| <i>Alchornea sidifolia</i>           | 4.00  | 37.60 | 1 |
| <i>Byrsonima ligustrifolia</i>       | NA    | 37.38 | 1 |
| <i>Viola gardneri</i>                | 20.00 | 37.26 | 1 |
| <i>Erythroxylum pulchrum</i>         | 6.54  | 37.03 | 1 |
| <i>Syagrus romanzoffiana</i>         | 16.60 | 36.95 | 1 |
| <i>Cordia myrciifolia</i>            | NA    | 36.75 | 1 |
| <i>Viola bicuhyba</i>                | 16.00 | 36.26 | 3 |
| <i>Chiococca alba</i>                | NA    | 36.24 | 1 |
| <i>Coussarea contracta</i>           | 22.43 | 36.13 | 1 |
| <i>Ilex theezans</i>                 | 2.70  | 35.95 | 1 |
| <i>Maytenus aquifolia</i>            | 7.00  | 35.91 | 2 |
| <i>Erythroxylum gonocladum</i>       | NA    | 35.35 | 1 |
| <i>Margaritopsis astrellantha</i>    | 3.00  | 34.77 | 1 |
| <i>Byrsonima variabilis</i>          | NA    | 34.46 | 1 |
| <i>Marcgravia polyantha</i>          | NA    | 34.03 | 1 |
| <i>Norantea brasiliensis</i>         | NA    | 34.03 | 1 |
| <i>Cupania emarginata</i>            | 6.61  | 33.85 | 1 |
| <i>Cupania oblongifolia</i>          | 9.70  | 33.44 | 5 |
| <i>Erythroxylum argentinum</i>       | 4.00  | 33.36 | 1 |
| <i>Erythroxylum ambiguum</i>         | NA    | 33.26 | 1 |
| <i>Erythroxylum deciduum</i>         | 4.70  | 32.85 | 1 |
| <i>Byrsonima cydoniifolia</i>        | NA    | 32.72 | 1 |
| <i>Erythroxylum ovalifolium</i>      | Na    | 32.46 | 1 |
| <i>Inga marginata</i>                | 9.00  | 32.21 | 1 |
| <i>Copaifera langsdorffii</i>        | 11.00 | 31.92 | 1 |
| <i>Copaifera trapezifolia</i>        | 11.53 | 31.92 | 2 |
| <i>Cabrlea canjerana</i>             | 9.00  | 30.58 | 3 |
| <i>Guatteria australis</i>           | 7.00  | 30.53 | 2 |
| <i>Symplocos uniflora</i>            | 6.40  | 29.88 | 4 |



|                                      |       |       |    |
|--------------------------------------|-------|-------|----|
| <i>Symplocos</i> sp                  | NA    | 29.65 | 1  |
| <i>Gaylussacia brasiliensis</i>      | 1.79  | 29.37 | 1  |
| <i>Vitex megapotamica</i>            | 8.90  | 29.23 | 1  |
| <i>Vitex polygama</i>                | 8.10  | 29.23 | 1  |
| <i>Gaylussacia pulchra</i>           | NA    | 28.55 | 1  |
| <i>Mollinedia schottiana</i>         | 5.90  | 27.93 | 2  |
| <i>Symplocos tetrandra</i>           | NA    | 27.57 | 1  |
| <i>Geonoma gamiova</i>               | 6.10  | 27.21 | 2  |
| <i>Symplocos glandulosomarginata</i> | NA    | 26.77 | 1  |
| <i>Geonoma elegans</i>               | NA    | 26.75 | 1  |
| <i>Geonoma pauciflora</i>            | 5.73  | 26.57 | 2  |
| <i>Protium icicariba</i>             | NA    | 26.50 | 1  |
| <i>Diploon</i> sp                    | NA    | 26.40 | 1  |
| <i>Mollinedia</i> sp                 | NA    | 26.37 | 1  |
| <i>Chrysophyllum viride</i>          | 10.00 | 26.31 | 1  |
| <i>Protium heptaphyllum</i>          | 7.50  | 26.24 | 4  |
| <i>Symplocos estrellensis</i>        | NA    | 26.14 | 1  |
| <i>Symplocos pubescens</i>           | NA    | 26.12 | 1  |
| <i>Clusia organensis</i>             | NA    | 25.73 | 1  |
| <i>Chrysophyllum flexuosum</i>       | 7.00  | 25.67 | 2  |
| <i>Mollinedia triflora</i>           | 9.00  | 25.34 | 1  |
| <i>Protium widgrenii</i>             | 9.00  | 25.31 | 1  |
| <i>Opuntia monacantha</i>            | NA    | 25.10 | 1  |
| <i>Cecropia pachystachya</i>         | 0.61  | 24.87 | 7  |
| <i>Lithraea molleoides</i>           | NA    | 24.51 | 1  |
| <i>Schinus terebinthifolia</i>       | 3.50  | 24.51 | 10 |
| <i>Cecropia glaziovii</i>            | 0.62  | 24.44 | 6  |
| <i>Pereskia aculeata</i>             | NA    | 24.40 | 1  |
| <i>Pilosocereus arrabidae</i>        | NA    | 23.94 | 1  |
| <i>Xylopia brasiliensis</i>          | 4.10  | 23.31 | 2  |
| <i>Xylopia sericea</i>               | 5.00  | 23.09 | 1  |
| <i>Xylopia langsdorfiana</i>         | 6.12  | 22.76 | 1  |
| <i>Cupania vernalis</i>              | 7.40  | 22.65 | 2  |
| <i>Zanthoxylum rhoifolium</i>        | 2.60  | 22.59 | 1  |
| <i>Zanthoxylum riedelianum</i>       | 2.70  | 22.59 | 1  |
| <i>Mollinedia boracensis</i>         | NA    | 22.35 | 1  |
| <i>Persea alba</i>                   | 9.60  | 21.92 | 1  |
| <i>Persea major</i>                  | NA    | 21.63 | 1  |
| <i>Chomelia parvifolia</i>           | NA    | 21.61 | 1  |
| <i>Guettarda viburnoides</i>         | 13.3  | 21.61 | 1  |
| <i>Persea willdenovii</i>            | 7.00  | 21.44 | 2  |
| <i>Myrsine coriacea</i>              | NA    | 21.22 | 6  |
| <i>Coccocypselum geophiloides</i>    | NA    | 21.20 | 1  |
| <i>Coccocypselum hasslerianum</i>    | NA    | 21.20 | 1  |
| <i>Mollinedia uleana</i>             | 9.00  | 21.17 | 1  |
| <i>Ficus</i> sp                      | NA    | 20.64 | 2  |
| <i>Nectandra megapotamica</i>        | 9.00  | 20.09 | 2  |

|                                |       |       |   |
|--------------------------------|-------|-------|---|
| <i>Ficus glabra</i>            | NA    | 20.03 | 1 |
| <i>Myrsine lancifolia</i>      | NA    | 19.77 | 1 |
| <i>Matayba elaeagnoides</i>    | 7.50  | 19.57 | 1 |
| <i>Matayba guianensis</i>      | 8.26  | 19.57 | 1 |
| <i>Ficus insipida</i>          | 1.70  | 19.23 | 2 |
| <i>Phoradendron</i> sp         | NA    | 19.00 | 2 |
| <i>Ilex brevicuspis</i>        | 1.50  | 18.97 | 2 |
| <i>Myrsine</i> sp              | NA    | 18.74 | 1 |
| <i>Genipa americana</i>        | 5.20  | 18.59 | 1 |
| <i>Ocotea dispersa</i>         | 7.70  | 18.53 | 1 |
| <i>Ficus enormis</i>           | 10.00 | 18.49 | 2 |
| <i>Myrsine parvifolia</i>      | NA    | 18.05 | 1 |
| <i>Myrsine venosa</i>          | 4.20  | 17.99 | 1 |
| <i>Phoradendron piperoides</i> | NA    | 17.93 | 1 |
| <i>Aiouea saligna</i>          | 9.00  | 17.88 | 1 |
| <i>Myrsine umbellata</i>       | 3.50  | 17.84 | 5 |
| <i>Guarea kunthiana</i>        | 10.00 | 17.49 | 1 |
| <i>Ocotea catharinensis</i>    | 8.50  | 17.48 | 1 |
| <i>Ficus hirsuta</i>           | NA    | 17.43 | 1 |
| <i>Ficus organensis</i>        | 0.70  | 17.34 | 1 |
| <i>Ocotea corymbosa</i>        | 6.00  | 17.31 | 2 |
| <i>Ocotea</i> sp               | NA    | 17.08 | 1 |
| <i>Ocotea bicolor</i>          | 10.30 | 16.98 | 1 |
| <i>Cestrum mariquitense</i>    | 2.70  | 16.89 | 4 |
| <i>Cestrum schlechtendalii</i> | NA    | 16.70 | 1 |
| <i>Myrsine gardneriana</i>     | NA    | 16.60 | 1 |
| <i>Trichilia catigua</i>       | 5.00  | 16.52 | 1 |
| <i>Inga edulis</i>             | 5.84  | 16.13 | 2 |
| <i>Inga laurina</i>            | 10.00 | 16.13 | 1 |
| <i>Ocotea teleiandra</i>       | 16.00 | 15.65 | 1 |
| <i>Ocotea notata</i>           | 4.00  | 15.49 | 1 |
| <i>Trichilia clausseni</i>     | 9.00  | 15.39 | 3 |
| <i>Ixora venulosa</i>          | NA    | 14.81 | 1 |
| <i>Clusia criuva</i>           | 1.80  | 14.80 | 4 |
| <i>Clusia hilariana</i>        | 2.50  | 14.80 | 2 |
| <i>Lantana</i> sp              | NA    | 14.27 | 1 |
| <i>Ixora gardneriana</i>       | 4.00  | 14.19 | 1 |
| <i>Ixora burchelliana</i>      | NA    | 14.16 | 1 |
| <i>Lantana camara</i>          | NA    | 13.68 | 2 |
| <i>Nectandra grandiflora</i>   | 10.00 | 12.52 | 1 |
| <i>Ocotea odorifera</i>        | 13.65 | 12.51 | 1 |
| <i>Allophylus edulis</i>       | 5.74  | 12.37 | 3 |
| <i>Lantana pohliana</i>        | NA    | 12.33 | 1 |
| <i>Nectandra membranacea</i>   | 10.00 | 12.23 | 2 |
| <i>Alibertia</i> sp            | NA    | 12.22 | 1 |
| <i>Nectandra reticulata</i>    | 8.00  | 12.07 | 1 |
| <i>Struthanthus concinnus</i>  | NA    | 12.04 | 1 |

|                                   |       |       |   |
|-----------------------------------|-------|-------|---|
| <i>Nectandra lanceolata</i>       | 11.40 | 11.99 | 1 |
| <i>Struthanthus martianus</i>     | NA    | 11.99 | 2 |
| <i>Psittacanthus</i> sp           | NA    | 11.42 | 1 |
| <i>Struthanthus</i> sp            | NA    | 11.36 | 1 |
| <i>Ilex microdonta</i>            | NA    | 10.08 | 1 |
| <i>Ilex pseudobuxus</i>           | 2.47  | 10.08 | 1 |
| <i>Acnistus arborescens</i>       | NA    | 9.95  | 1 |
| <i>Vassobia breviflora</i>        | NA    | 9.95  | 1 |
| <i>Guarea guidonia</i>            | 10.00 | 9.41  | 2 |
| <i>Guarea macrophylla</i>         | 8.60  | 9.41  | 5 |
| <i>Psychotria nuda</i>            | NA    | 9.14  | 1 |
| <i>Psychotria vellosiana</i>      | NA    | 9.11  | 2 |
| <i>Psychotria suterella</i>       | 3.00  | 8.95  | 2 |
| <i>Psychotria</i> sp              | NA    | 8.94  | 1 |
| <i>Psychotria mapourioides</i>    | NA    | 8.83  | 2 |
| <i>Psychotria sessilis</i>        | NA    | 8.71  | 1 |
| <i>Psychotria forsteronioides</i> | NA    | 8.62  | 1 |
| <i>Psychotria leiocarpa</i>       | 2.30  | 8.45  | 1 |
| <i>Ficus eximia</i>               | 1.20  | 8.12  | 1 |
| <i>Rudgea jasminoides</i>         | NA    | 7.64  | 3 |
| <i>Rudgea recurva</i>             | NA    | 7.64  | 1 |
| <i>Amaioua guianensis</i>         | 3.50  | 7.15  | 1 |
| <i>Amaioua intermedia</i>         | 3.61  | 7.15  | 1 |
| <i>Myrcia tomentosa</i>           | 4.30  | 6.70  | 1 |
| <i>Psychotria gracilentia</i>     | NA    | 6.14  | 1 |
| <i>Rhipsalis camposportoana</i>   | NA    | 6.02  | 1 |
| <i>Rhipsalis elliptica</i>        | NA    | 6.00  | 1 |
| <i>Rhipsalis teres</i>            | NA    | 5.75  | 1 |
| <i>Solanum americanum</i>         | NA    | 5.72  | 1 |
| <i>Miconia valtheri</i>           | 0.30  | 5.66  | 1 |
| <i>Myrcia palustris</i>           | 0.30  | 5.64  | 1 |
| <i>Myrcia spectabilis</i>         | 11.40 | 5.48  | 3 |
| <i>Rhipsalis</i> sp               | NA    | 5.45  | 2 |
| <i>Myrciaria cuspidata</i>        | 3.60  | 5.44  | 1 |
| <i>Myrceugenia myrcioides</i>     | 8.00  | 5.40  | 1 |
| <i>Rhipsalis paradoxa</i>         | NA    | 5.34  | 1 |
| <i>Myrcia oblongata</i>           | NA    | 5.30  | 1 |
| <i>Myrcia pulchra</i>             | 3.90  | 5.30  | 1 |
| <i>Myrcia pubipetala</i>          | 0.30  | 5.17  | 2 |
| <i>Miconia theizans</i>           | 0.30  | 5.12  | 1 |
| <i>Miconia inconspicua</i>        | 0.30  | 5.09  | 1 |
| <i>Myrcia ferruginea</i>          | 4.60  | 5.06  | 1 |
| <i>Ficus luschnathiana</i>        | 0.70  | 5.06  | 2 |
| <i>Ficus pertusa</i>              | 1.10  | 5.06  | 1 |
| <i>Miconia paniculata</i>         | 0.30  | 4.91  | 1 |
| <i>Miconia rubiginosa</i>         | 0.30  | 4.89  | 1 |
| <i>Myrcia strigipes</i>           | 11.40 | 4.89  | 1 |

|                               |       |      |   |
|-------------------------------|-------|------|---|
| <i>Miconia tentaculifera</i>  | 0.30  | 4.86 | 1 |
| <i>Myrcia anacardiifolia</i>  | 8.00  | 4.74 | 2 |
| <i>Miconia albicans</i>       | 1.00  | 4.69 | 3 |
| <i>Miconia</i> sp             | NA    | 4.60 | 1 |
| <i>Myrcia hartwegiana</i>     | 3.46  | 4.58 | 1 |
| <i>Myrcia ilheosensis</i>     | 3.90  | 4.48 | 2 |
| <i>Leandra aurea</i>          | 0.40  | 4.44 | 1 |
| <i>Miconia latecrenata</i>    | 0.30  | 4.41 | 1 |
| <i>Miconia discolor</i>       | 0.30  | 4.37 | 2 |
| <i>Ossaea</i> sp              | NA    | 4.35 | 1 |
| <i>Miconia chartacea</i>      | 0.30  | 4.33 | 2 |
| <i>Leandra regnellii</i>      | NA    | 4.29 | 1 |
| <i>Miconia budlejoides</i>    | 1.00  | 4.27 | 3 |
| <i>Miconia brasiliensis</i>   | 1.00  | 4.26 | 1 |
| <i>Leandra australis</i>      | NA    | 4.25 | 2 |
| <i>Miconia racemifera</i>     | 0.30  | 4.23 | 2 |
| <i>Leandra acutiflora</i>     | NA    | 4.22 | 1 |
| <i>Eugenia uruguayensis</i>   | NA    | 4.22 | 1 |
| <i>Miconia tristis</i>        | 0.30  | 4.18 | 3 |
| <i>Miconia pusilliflora</i>   | 1.70  | 4.12 | 3 |
| <i>Solanum inodorum</i>       | NA    | 4.06 | 1 |
| <i>Leandra variabilis</i>     | 1.00  | 4.04 | 1 |
| <i>Eugenia brasiliensis</i>   | 4.45  | 3.99 | 2 |
| <i>Leandra laevigata</i>      | NA    | 3.97 | 1 |
| <i>Leandra</i> sp             | NA    | 3.95 | 1 |
| <i>Leandra sabiaensis</i>     | NA    | 3.89 | 1 |
| <i>Leandra refracta</i>       | NA    | 3.88 | 1 |
| <i>Endlicheria paniculata</i> | 12.50 | 3.84 | 2 |
| <i>Solanum didymum</i>        | NA    | 3.83 | 1 |
| <i>Solanum myrianthum</i>     | NA    | 3.81 | 1 |
| <i>Eugenia astringens</i>     | NA    | 3.80 | 2 |
| <i>Leandra xanthocoma</i>     | NA    | 3.79 | 1 |
| <i>Leandra pilonensis</i>     | 1.00  | 3.77 | 1 |
| <i>Miconia elegans</i>        | 0.30  | 3.76 | 1 |
| <i>Leandra melastomoides</i>  | 1.00  | 3.75 | 1 |
| <i>Solanum bullatum</i>       | NA    | 3.74 | 1 |
| <i>Eugenia melanogyna</i>     | 21.00 | 3.74 | 1 |
| <i>Ossaea amygdaloides</i>    | NA    | 3.74 | 1 |
| <i>Eugenia mosenii</i>        | 19.00 | 3.73 | 2 |
| <i>Eugenia neoglomerata</i>   | 14.46 | 3.73 | 2 |
| <i>Solanum variabile</i>      | NA    | 3.72 | 1 |
| <i>Eugenia handroi</i>        | 8.34  | 3.72 | 1 |
| <i>Solanum swartzianum</i>    | NA    | 3.70 | 1 |
| <i>Eugenia hiemalis</i>       | NA    | 3.66 | 1 |
| <i>Eugenia oblongata</i>      | 15.00 | 3.66 | 1 |
| <i>Eugenia involucrata</i>    | 7.00  | 3.63 | 1 |
| <i>Eugenia</i> sp             | NA    | 3.61 | 1 |

|                                  |       |      |   |
|----------------------------------|-------|------|---|
| <i>Nectandra cuspidata</i>       | 10.00 | 3.60 | 1 |
| <i>Ocotea puberula</i>           | 5.00  | 3.60 | 1 |
| <i>Eugenia expansa</i>           | 9.40  | 3.58 | 1 |
| <i>Leandra barbinervis</i>       | 1.00  | 3.51 | 1 |
| <i>Solanum rufescens</i>         | NA    | 3.50 | 1 |
| <i>Solanum granulosoleprosum</i> | NA    | 3.47 | 1 |
| <i>Psidium cattleianum</i>       | 2.50  | 3.12 | 2 |
| <i>Siphoneugena densiflora</i>   | 5.30  | 3.12 | 1 |
| <i>Solanum argenteum</i>         | 3.00  | 2.96 | 1 |
| <i>Solanum mauritianum</i>       | NA    | 2.96 | 2 |
| <i>Myrcia splendens</i>          | 4.60  | 2.71 | 4 |
| <i>Paullinia weinmanniifolia</i> | NA    | 2.62 | 1 |
| <i>Plinia cauliflora</i>         | 5.50  | 2.61 | 2 |
| <i>Calyptranthes concinna</i>    | 5.00  | 2.59 | 2 |
| <i>Myrciaria floribunda</i>      | 4.50  | 2.59 | 1 |
| <i>Paullinia rhomboidea</i>      | NA    | 2.50 | 1 |
| <i>Paullinia uloptera</i>        | NA    | 2.44 | 1 |
| <i>Paullinia sp</i>              | NA    | 2.37 | 2 |
| <i>Marlierea obscura</i>         | 8.40  | 2.30 | 3 |
| <i>Marlierea reitzii</i>         | NA    | 2.28 | 1 |
| <i>Miconia sellowiana</i>        | 0.30  | 2.26 | 2 |
| <i>Marlierea suaveolens</i>      | 10.00 | 2.22 | 1 |
| <i>Myrcia brasiliensis</i>       | 5.70  | 2.19 | 1 |
| <i>Myrcia hebetepala</i>         | 8.80  | 2.19 | 2 |
| <i>Ocotea pulchella</i>          | 5.00  | 2.05 | 3 |
| <i>Ocotea spixiana</i>           | 5.40  | 2.05 | 1 |
| <i>Eugenia cerasiflora</i>       | 10.00 | 1.95 | 1 |
| <i>Eugenia uniflora</i>          | 11.40 | 1.95 | 4 |
| <i>Campomanesia guaviroba</i>    | 8.60  | 1.65 | 1 |
| <i>Campomanesia xanthocarpa</i>  | 4.90  | 1.65 | 1 |
| <i>Miconia prasina</i>           | 0.61  | 1.43 | 1 |
| <i>Miconia cabucu</i>            | 1.30  | 1.38 | 2 |
| <i>Miconia cubatanensis</i>      | 0.30  | 1.38 | 2 |
| <i>Miconia cinnamomifolia</i>    | 0.30  | 1.31 | 6 |
| <i>Miconia ligustroides</i>      | 1.00  | 0.74 | 1 |
| <i>Miconia minutiflora</i>       | 0.30  | 0.74 | 1 |

---

**Table S4. The bird–seed dispersal interactions recorded in the studied sites of the Atlantic Forest, followed by their EDi and correspondent asymmetry.** EDi = Evolutionary distinctness of the interaction, estimated by the sum of the ED of the interacting partners (see Table S2 and S3 for plant and bird species ED) in millions of years (MY). Asymmetries refer to the difference between partners ED. ‘Plant skewed’ asymmetries correspond to interactions in which plant species are more distinct than their partner seed disperser while ‘Bird-skewed’ asymmetries correspond to the opposite. Interactions are sorted in a decreasing order of ED.

| Bird-plant interaction                                  | EDi (MY) | Asymmetry | Asymmetry magnitude | Asymmetry skewness | N fragments present |
|---------------------------------------------------------|----------|-----------|---------------------|--------------------|---------------------|
| <i>Pipile jacutinga Podocarpus sellowii</i>             | 381.22   | -0.918    | high                | Plant-skewed       | 1                   |
| <i>Tangara desmaresti Hedyosmum brasiliense</i>         | 275.61   | -0.991    | high                | Plant-skewed       | 1                   |
| <i>Pipile jacutinga Meliosma sellowii</i>               | 182.67   | -0.811    | high                | Plant-skewed       | 1                   |
| <i>Baryphthengus ruficapillus Euterpe edulis</i>        | 170.24   | -0.275    | high                | Plant-skewed       | 2                   |
| <i>Pipile jacutinga Cinnamodendron dinisii</i>          | 163.58   | -0.785    | high                | Plant-skewed       | 2                   |
| <i>Pyroderus scutatus Cinnamodendron dinisii</i>        | 154.86   | -0.849    | high                | Plant-skewed       | 2                   |
| <i>Procnias nudicollis Cinnamodendron dinisii</i>       | 152.74   | -0.865    | high                | Plant-skewed       | 1                   |
| <i>Carpornis cucullata Drimys brasiliensis</i>          | 151.98   | -0.871    | high                | Plant-skewed       | 1                   |
| <i>Trogon rufus Philodendron appendiculatum</i>         | 145.61   | -0.506    | high                | Plant-skewed       | 1                   |
| <i>Ramphastos vitellinus Cinnamodendron dinisii</i>     | 144.43   | -0.927    | high                | Plant-skewed       | 1                   |
| <i>Stephanophorus diadematus Drimys brasiliensis</i>    | 144.30   | -0.928    | high                | Plant-skewed       | 1                   |
| <i>Tangara preciosa Cinnamodendron dinisii</i>          | 139.58   | -0.963    | high                | Plant-skewed       | 1                   |
| <i>Thraupis cyanoptera Drimys brasiliensis</i>          | 138.86   | -0.968    | high                | Plant-skewed       | 1                   |
| <i>Oxyruncus cristatus Euterpe edulis</i>               | 133.86   | -0.644    | high                | Plant-skewed       | 1                   |
| <i>Pipile jacutinga Hyeronima alchorneoides</i>         | 131.72   | -0.718    | high                | Plant-skewed       | 1                   |
| <i>Trogon viridis Euterpe edulis</i>                    | 128.93   | -0.694    | high                | Plant-skewed       | 3                   |
| <i>Mimus gilvus Smilax rufescens</i>                    | 128.08   | -0.814    | high                | Plant-skewed       | 1                   |
| <i>Pipile jacutinga Euterpe edulis</i>                  | 127.69   | -0.706    | high                | Plant-skewed       | 3                   |
| <i>Pyroderus scutatus Abuta seloana</i>                 | 127.06   | -0.810    | high                | Plant-skewed       | 1                   |
| <i>Selenidera maculirostris Hyeronima alchorneoides</i> | 126.30   | -0.771    | high                | Plant-skewed       | 1                   |
| <i>Tachyphonus coronatus Dichorisandra</i>              | 125.83   | -0.954    | high                | Plant-skewed       | 1                   |

*thyrsiflora*

|                                                                 |        |        |      |              |   |
|-----------------------------------------------------------------|--------|--------|------|--------------|---|
| <i>Carpornis cucullata Smilax elastica</i>                      | 125.41 | -0.839 | high | Plant-skewed | 1 |
| <i>Selenidera maculirostris Euterpe edulis</i>                  | 122.27 | -0.761 | high | Plant-skewed | 3 |
| <i>Tityra cayana Hyeronima alchorneoides</i>                    | 121.50 | -0.817 | high | Plant-skewed | 1 |
| <i>Selenidera maculirostris Philodendron<br/>appendiculatum</i> | 121.02 | -0.758 | high | Plant-skewed | 1 |
| <i>Carpornis cucullata Fuchsia regia</i>                        | 120.27 | -0.831 | high | Plant-skewed | 1 |
| <i>Guira guira Casearia sylvestris</i>                          | 120.26 | -0.240 | high | Plant-skewed | 1 |
| <i>Tachyphonus coronatus Hedychium<br/>coronarium</i>           | 119.13 | -0.951 | high | Plant-skewed | 1 |
| <i>Pyroderus scutatus Euterpe edulis</i>                        | 118.96 | -0.795 | high | Plant-skewed | 3 |
| <i>Vireo olivaceus Pera glabrata</i>                            | 118.49 | -0.707 | high | Plant-skewed | 1 |
| <i>Melanerpes flavifrons Hyeronima<br/>alchorneoides</i>        | 118.06 | -0.851 | high | Plant-skewed | 1 |
| <i>Myiodynastes maculatus Cissampelos<br/>andromorpha</i>       | 117.80 | -0.897 | high | Plant-skewed | 1 |
| <i>Tityra cayana Euterpe edulis</i>                             | 117.47 | -0.810 | high | Plant-skewed | 2 |
| <i>Procnias nudicollis Euterpe edulis</i>                       | 116.85 | -0.816 | high | Plant-skewed | 3 |
| <i>Pitangus sulphuratus Humiria balsamifera</i>                 | 116.31 | -0.878 | high | Plant-skewed | 1 |
| <i>Carpornis cucullata Euterpe edulis</i>                       | 116.08 | -0.824 | high | Plant-skewed | 2 |
| <i>Carpornis melanocephala Euterpe edulis</i>                   | 116.08 | -0.824 | high | Plant-skewed | 1 |
| <i>Tachyphonus coronatus Momordica charantia</i>                | 115.85 | -0.950 | high | Plant-skewed | 1 |
| <i>Trogon surrucura Euterpe edulis</i>                          | 115.84 | -0.826 | high | Plant-skewed | 1 |
| <i>Pteroglossus bailloni Hyeronima alchorneoides</i>            | 115.69 | -0.874 | high | Plant-skewed | 1 |
| <i>Cacicus haemorrhous Abuta seloana</i>                        | 115.52 | -0.918 | high | Plant-skewed | 1 |
| <i>Euphonia pectoralis Fuchsia regia</i>                        | 114.95 | -0.883 | high | Plant-skewed | 1 |
| <i>Mionectes rufiventris Hyeronima alchorneoides</i>            | 114.84 | -0.882 | high | Plant-skewed | 1 |
| <i>Tangara peruviana Smilax rufescens</i>                       | 114.50 | -0.940 | high | Plant-skewed | 1 |
| <i>Turdus albicollis Cissampelos andromorpha</i>                | 114.38 | -0.929 | high | Plant-skewed | 1 |
| <i>Trichothraupis melanops Cissampelos<br/>andromorpha</i>      | 113.99 | -0.933 | high | Plant-skewed | 1 |

|                                                          |        |        |      |              |   |
|----------------------------------------------------------|--------|--------|------|--------------|---|
| <i>Turdus rufiventris Cissampelos andromorpha</i>        | 113.03 | -0.942 | high | Plant-skewed | 1 |
| <i>Lipaugus lanioides Hyeronima alchorneoides</i>        | 112.68 | -0.903 | high | Plant-skewed | 1 |
| <i>Chiroxiphia caudate Cissampelos andromorpha</i>       | 112.65 | -0.945 | high | Plant-skewed | 1 |
| <i>Ramphastos vitellinus Hyeronima alchorneoides</i>     | 112.57 | -0.904 | high | Plant-skewed | 1 |
| <i>Stephanophorus diadematus Hyeronima alchorneoides</i> | 112.43 | -0.906 | high | Plant-skewed | 1 |
| <i>Tachyphonus coronatus Cissampelos andromorpha</i>     | 112.35 | -0.948 | high | Plant-skewed | 1 |
| <i>Mimus saturninus Heisteria perianthomega</i>          | 112.31 | -0.783 | high | Plant-skewed | 1 |
| <i>Celeus flavescens Euterpe edulis</i>                  | 111.83 | -0.867 | high | Plant-skewed | 1 |
| <i>Tersina viridis Hyeronima alchorneoides</i>           | 111.76 | -0.912 | high | Plant-skewed | 1 |
| <i>Pteroglossus bailloni Euterpe edulis</i>              | 111.66 | -0.869 | high | Plant-skewed | 1 |
| <i>Pitangus sulphuratus Euterpe edulis</i>               | 111.30 | -0.872 | high | Plant-skewed | 1 |
| <i>Penelope obscura Euterpe edulis</i>                   | 110.91 | -0.876 | high | Plant-skewed | 3 |
| <i>Camptostoma obsoletum Pera glabrata</i>               | 110.85 | -0.790 | high | Plant-skewed | 1 |
| <i>Turdus albicollis Fuchsia regia</i>                   | 110.47 | -0.926 | high | Plant-skewed | 1 |
| <i>Turdus albicollis Hyeronima alchorneoides</i>         | 110.32 | -0.926 | high | Plant-skewed | 2 |
| <i>Euphonia violacea Euterpe edulis</i>                  | 110.30 | -0.882 | high | Plant-skewed | 1 |
| <i>Turdus amaurochalinus Euterpe edulis</i>              | 110.23 | -0.883 | high | Plant-skewed | 2 |
| <i>Turdus flavipes Hyeronima alchorneoides</i>           | 110.19 | -0.927 | high | Plant-skewed | 1 |
| <i>Trichothraupis melanops Hyeronima alchorneoides</i>   | 109.92 | -0.930 | high | Plant-skewed | 1 |
| <i>Dacnis cayana Hyeronima alchorneoides</i>             | 109.85 | -0.931 | high | Plant-skewed | 1 |
| <i>Myiodynastes maculatus Euterpe edulis</i>             | 109.71 | -0.888 | high | Plant-skewed | 1 |
| <i>Turdus rufiventris Hyeronima alchorneoides</i>        | 108.97 | -0.939 | high | Plant-skewed | 1 |
| <i>Myiophobus fasciatus Pera glabrata</i>                | 108.92 | -0.811 | high | Plant-skewed | 1 |
| <i>Pteroglossus aracari Euterpe edulis</i>               | 108.78 | -0.898 | high | Plant-skewed | 1 |
| <i>Chiroxiphia caudate Fuchsia regia</i>                 | 108.74 | -0.943 | high | Plant-skewed | 1 |
| <i>Pipile jacutinga Quiina glaziovii</i>                 | 108.70 | -0.636 | high | Plant-skewed | 1 |
| <i>Lipaugus lanioides Euterpe edulis</i>                 | 108.65 | -0.899 | high | Plant-skewed | 1 |



|                                                            |        |        |      |              |   |
|------------------------------------------------------------|--------|--------|------|--------------|---|
| <i>Ramphastos dicolorus Euterpe edulis</i>                 | 108.55 | -0.900 | high | Plant-skewed | 3 |
| <i>Ramphastos vitellinus Euterpe edulis</i>                | 108.54 | -0.900 | high | Plant-skewed | 3 |
| <i>Tachyphonus coronatus Fuchsia regia</i>                 | 108.44 | -0.946 | high | Plant-skewed | 1 |
| <i>Hemithraupis ruficapilla Hyeronima alchorneoides</i>    | 108.35 | -0.945 | high | Plant-skewed | 1 |
| <i>Tangara peruviana Cassytha filiformis</i>               | 107.82 | -0.936 | high | Plant-skewed | 1 |
| <i>Baryphthengus ruficapillus Virola bicuhyba</i>          | 107.79 | 0.493  | high | Bird-skewed  | 2 |
| <i>Habia rubica Chamissoa altissima</i>                    | 107.75 | -0.807 | high | Plant-skewed | 1 |
| <i>Cyclarhis gujanensis Casearia sylvestris</i>            | 107.52 | -0.427 | high | Plant-skewed | 2 |
| <i>Orthogonys chloricterus Euterpe edulis</i>              | 107.47 | -0.911 | high | Plant-skewed | 2 |
| <i>Cacicus haemorrhous Euterpe edulis</i>                  | 107.43 | -0.912 | high | Plant-skewed | 1 |
| <i>Vireo olivaceus Dendropanax cuneatus</i>                | 107.40 | -0.666 | high | Plant-skewed | 1 |
| <i>Vireo olivaceus Sapium glandulosum</i>                  | 107.32 | -0.666 | high | Plant-skewed | 1 |
| <i>Thraupis cyanoptera Fuchsia regia</i>                   | 107.15 | -0.959 | high | Plant-skewed | 1 |
| <i>Tolmomyias flaviventris Chamissoa altissima</i>         | 106.46 | -0.822 | high | Plant-skewed | 1 |
| <i>Tolmomyias sulphurescens Chamissoa altissima</i>        | 106.46 | -0.822 | high | Plant-skewed | 1 |
| <i>Turdus albicollis Euterpe edulis</i>                    | 106.29 | -0.923 | high | Plant-skewed | 5 |
| <i>Turdus flavipes Euterpe edulis</i>                      | 106.16 | -0.924 | high | Plant-skewed | 4 |
| <i>Hylophilus amaurocephalus Chamissoa altissima</i>       | 105.74 | -0.830 | high | Plant-skewed | 1 |
| <i>Thraupis sayaca Fuchsia regia</i>                       | 105.67 | -0.973 | high | Plant-skewed | 1 |
| <i>Manacus manacus Pera glabrata</i>                       | 105.65 | -0.847 | high | Plant-skewed | 1 |
| <i>Schistochlamys ruficapillus Cassytha filiformis</i>     | 105.54 | -0.959 | high | Plant-skewed | 1 |
| <i>Turdus subalaris Chamissoa altissima</i>                | 105.33 | -0.834 | high | Plant-skewed | 1 |
| <i>Tangara desmaresti Hyeronima alchorneoides</i>          | 105.21 | -0.976 | high | Plant-skewed | 1 |
| <i>Turdus rufiventris Euterpe edulis</i>                   | 104.94 | -0.937 | high | Plant-skewed | 3 |
| <i>Ramphastos vitellinus Margaritaria nobilis</i>          | 104.90 | -0.897 | high | Plant-skewed | 1 |
| <i>Zonotrichia capensis Scutia buxifolia</i>               | 104.78 | -0.831 | high | Plant-skewed | 1 |
| <i>Trichothraupis melanops Philodendron appendiculatum</i> | 104.63 | -0.926 | high | Plant-skewed | 1 |

|                                                    |        |        |      |              |   |
|----------------------------------------------------|--------|--------|------|--------------|---|
| <i>Trogon rufus Coussapoa microcarpa</i>           | 104.59 | -0.146 | high | Plant-skewed | 1 |
| <i>Saltator similis Euterpe edulis</i>             | 104.45 | -0.942 | high | Plant-skewed | 1 |
| <i>Manacus manacus Chamissoa altissima</i>         | 104.37 | -0.845 | high | Plant-skewed | 1 |
| <i>Tachyphonus coronatus Euterpe edulis</i>        | 104.26 | -0.944 | high | Plant-skewed | 2 |
| <i>Turdus leucomelas Euterpe edulis</i>            | 103.92 | -0.947 | high | Plant-skewed | 3 |
| <i>Sirystes sibilator Pera glabrata</i>            | 103.79 | -0.867 | high | Plant-skewed | 1 |
| <i>Tangara sp Euterpe edulis</i>                   | 103.39 | -0.953 | high | Plant-skewed | 1 |
| <i>Elaenia obscura Chamissoa altissima</i>         | 103.34 | -0.856 | high | Plant-skewed | 1 |
| <i>Tangara seledon Euterpe edulis</i>              | 103.29 | -0.954 | high | Plant-skewed | 2 |
| <i>Selenidera maculirostris Quiina glaziovii</i>   | 103.29 | -0.704 | high | Plant-skewed | 1 |
| <i>Attila rufus Costus spiralis</i>                | 103.20 | -0.878 | high | Plant-skewed | 1 |
| <i>Vireo olivaceus Sloanea hirsuta</i>             | 102.25 | -0.644 | high | Plant-skewed | 1 |
| <i>Tangara cyanocephala Euterpe edulis</i>         | 102.07 | -0.966 | high | Plant-skewed | 1 |
| <i>Phyllomyias fasciatus Chamissoa altissima</i>   | 101.89 | -0.872 | high | Plant-skewed | 1 |
| <i>Turdus amaurochalinus Chamissoa altissima</i>   | 101.86 | -0.872 | high | Plant-skewed | 1 |
| <i>Conirostrum speciosum Chamissoa altissima</i>   | 101.67 | -0.875 | high | Plant-skewed | 1 |
| <i>Cyanerpes cyaneus Pera glabrata</i>             | 101.66 | -0.890 | high | Plant-skewed | 1 |
| <i>Myiodynastes maculatus Chamissoa altissima</i>  | 101.35 | -0.878 | high | Plant-skewed | 1 |
| <i>Coereba flaveola Pera glabrata</i>              | 101.30 | -0.894 | high | Plant-skewed | 1 |
| <i>Cacicus haemorrhous Pera glabrata</i>           | 100.34 | -0.905 | high | Plant-skewed | 1 |
| <i>Megarynchus pitangua Chamissoa altissima</i>    | 100.27 | -0.890 | high | Plant-skewed | 1 |
| <i>Pipra pipra Pera glabrata</i>                   | 99.47  | -0.914 | high | Plant-skewed | 1 |
| <i>Stephanophorus diadematus Scutia buxifolia</i>  | 99.35  | -0.892 | high | Plant-skewed | 1 |
| <i>Tityra inquisitor Tetrorchidium rubrivenium</i> | 99.22  | -0.767 | high | Plant-skewed | 1 |
| <i>Tityra cayana Tetrorchidium rubrivenium</i>     | 99.22  | -0.767 | high | Plant-skewed | 1 |
| <i>Tityra cayana Sapium glandulosum</i>            | 99.22  | -0.767 | high | Plant-skewed | 1 |
| <i>Thlypopsis sordida Chamissoa altissima</i>      | 98.97  | -0.904 | high | Plant-skewed | 1 |
| <i>Selenidera maculirostris Sloanea guianensis</i> | 98.95  | -0.687 | high | Plant-skewed | 1 |
| <i>Trichothraupis melanops Pera glabrata</i>       | 98.81  | -0.922 | high | Plant-skewed | 1 |
| <i>Dacnis cayana Pera glabrata</i>                 | 98.74  | -0.922 | high | Plant-skewed | 2 |
| <i>Pseudoleistes girahuro Chamissoa altissima</i>  | 98.59  | -0.909 | high | Plant-skewed | 1 |

|                                                       |       |        |      |              |   |
|-------------------------------------------------------|-------|--------|------|--------------|---|
| <i>Cacicus chrysopterus Scutia buxifolia</i>          | 98.38 | -0.903 | high | Plant-skewed | 1 |
| <i>Saltator fuliginosus Chamissoa altissima</i>       | 97.98 | -0.915 | high | Plant-skewed | 1 |
| <i>Elaenia flavogaster Chamissoa altissima</i>        | 97.91 | -0.916 | high | Plant-skewed | 1 |
| <i>Myiophobus fasciatus Dendropanax cuneatus</i>      | 97.83 | -0.785 | high | Plant-skewed | 1 |
| <i>Coryphospingus pileatus Pera glabrata</i>          | 97.81 | -0.932 | high | Plant-skewed | 1 |
| <i>Turdus flavipes Chamissoa altissima</i>            | 97.80 | -0.917 | high | Plant-skewed | 1 |
| <i>Poospiza lateralis Scutia buxifolia</i>            | 97.71 | -0.910 | high | Plant-skewed | 1 |
| <i>Elaenia sp Scutia buxifolia</i>                    | 97.63 | -0.911 | high | Plant-skewed | 1 |
| <i>Trogon surrucura Tetrorchidium rubrivenium</i>     | 97.59 | -0.787 | high | Plant-skewed | 1 |
| <i>Trogon surrucura Sapium glandulosum</i>            | 97.59 | -0.787 | high | Plant-skewed | 1 |
| <i>Trichothraupis melanops Chamissoa altissima</i>    | 97.53 | -0.920 | high | Plant-skewed | 1 |
| <i>Chiroxiphia caudate Pera glabrata</i>              | 97.47 | -0.936 | high | Plant-skewed | 1 |
| <i>Dacnis cayana Chamissoa altissima</i>              | 97.46 | -0.921 | high | Plant-skewed | 1 |
| <i>Saltator similis Pera glabrata</i>                 | 97.37 | -0.937 | high | Plant-skewed | 1 |
| <i>Tachyphonus coronatus Pera glabrata</i>            | 97.17 | -0.939 | high | Plant-skewed | 1 |
| <i>Myiarchus tyrannulus Chamissoa altissima</i>       | 97.17 | -0.924 | high | Plant-skewed | 1 |
| <i>Hemithraupis flavicollis Pera glabrata</i>         | 97.06 | -0.941 | high | Plant-skewed | 1 |
| <i>Chiroxiphia caudate Chamissoa altissima</i>        | 96.19 | -0.935 | high | Plant-skewed | 1 |
| <i>Saltator similis Chamissoa altissima</i>           | 96.09 | -0.936 | high | Plant-skewed | 1 |
| <i>Baryphthengus ruficapillus Cecropia glaziovii</i>  | 95.97 | 0.658  | high | Bird-skewed  | 1 |
| <i>Tachyphonus coronatus Chamissoa altissima</i>      | 95.89 | -0.939 | high | Plant-skewed | 1 |
| <i>Pachyramphus validus Tetrorchidium rubrivenium</i> | 95.88 | -0.808 | high | Plant-skewed | 1 |
| <i>Pteroglossus bailloni Cissus paulliniifolia</i>    | 95.74 | -0.843 | high | Plant-skewed | 1 |
| <i>Turdus fumigatus Chamissoa altissima</i>           | 95.58 | -0.942 | high | Plant-skewed | 1 |
| <i>Saltator similis Scutia buxifolia</i>              | 95.41 | -0.936 | high | Plant-skewed | 1 |
| <i>Tangara cayana Chamissoa altissima</i>             | 95.36 | -0.944 | high | Plant-skewed | 1 |
| <i>Stephanophorus diadematus Ilex affinis</i>         | 95.21 | -0.887 | high | Plant-skewed | 1 |
| <i>Vireo olivaceus Casearia sylvestris</i>            | 95.20 | -0.607 | high | Plant-skewed | 2 |
| <i>Pipile jacutinga Garcinia gardneriana</i>          | 94.89 | -0.560 | high | Plant-skewed | 1 |
| <i>Thraupis episcopus Samanea tubulosa</i>            | 94.67 | -0.970 | high | Plant-skewed | 1 |

|                                                        |       |        |      |              |   |
|--------------------------------------------------------|-------|--------|------|--------------|---|
| <i>Tangara preciosa Scutia buxifolia</i>               | 94.63 | -0.944 | high | Plant-skewed | 1 |
| <i>Manacus manacus Dendropanax cuneatus</i>            | 94.56 | -0.826 | high | Plant-skewed | 1 |
| <i>Schistochlamys melanopis Chamissoa altissima</i>    | 94.53 | -0.954 | high | Plant-skewed | 1 |
| <i>Thraupis sayaca Pera glabrata</i>                   | 94.40 | -0.970 | high | Plant-skewed | 2 |
| <i>Tityra cayana Sloanea guianensis</i>                | 94.15 | -0.751 | high | Plant-skewed | 1 |
| <i>Tangara desmaresti Pera glabrata</i>                | 94.09 | -0.973 | high | Plant-skewed | 1 |
| <i>Habia rubica Melastomataceae sp</i>                 | 93.78 | -0.772 | high | Plant-skewed | 1 |
| <i>Schiffornis virescens Casearia decandra</i>         | 93.28 | -0.635 | high | Plant-skewed | 1 |
| <i>Pipile jacutinga Sorocea bonplandii</i>             | 93.24 | -0.549 | high | Plant-skewed | 1 |
| <i>Thraupis sayaca Chamissoa altissima</i>             | 93.12 | -0.969 | high | Plant-skewed | 1 |
| <i>Pitangus sulphuratus Sapium glandulosum</i>         | 93.05 | -0.843 | high | Plant-skewed | 1 |
| <i>Habia rubica Sloanea guianensis</i>                 | 92.79 | -0.769 | high | Plant-skewed | 1 |
| <i>Mionectes rufiventris Tetrorchidium rubrivenium</i> | 92.56 | -0.850 | high | Plant-skewed | 1 |
| <i>Thraupis sayaca Scutia buxifolia</i>                | 92.44 | -0.969 | high | Plant-skewed | 1 |
| <i>Stephanophorus diadematus Vismia brasiliensis</i>   | 92.16 | -0.882 | high | Plant-skewed | 1 |
| <i>Penelope obscura Quiina glaziovii</i>               | 91.93 | -0.847 | high | Plant-skewed | 1 |
| <i>Myiodynastes maculatus Sapium glandulosum</i>       | 91.46 | -0.863 | high | Plant-skewed | 1 |
| <i>Pachyramphus castaneus Sloanea guianensis</i>       | 90.75 | -0.796 | high | Plant-skewed | 1 |
| <i>Trogon rufus Rubus rosifolius</i>                   | 90.55 | 0.120  | high | Bird-skewed  | 1 |
| <i>Zonotrichia capensis Sloanea hirsuta</i>            | 90.50 | -0.799 | high | Plant-skewed | 1 |
| <i>Turdus subalaris Sloanea hirsuta</i>                | 90.37 | -0.801 | high | Plant-skewed | 1 |
| <i>Pipile jacutinga Tapirira guianensis</i>            | 90.31 | -0.527 | high | Plant-skewed | 1 |
| <i>Piaya cayana Myrsine umbellata</i>                  | 89.83 | 0.752  | high | Bird-skewed  | 1 |
| <i>Dacnis cayana Vismia brasiliensis</i>               | 89.58 | -0.914 | high | Plant-skewed | 1 |
| <i>Ramphastos vitellinus Quiina glaziovii</i>          | 89.55 | -0.877 | high | Plant-skewed | 1 |
| <i>Cacicus haemorrhous Tetrorchidium rubrivenium</i>   | 89.17 | -0.892 | high | Plant-skewed | 1 |
| <i>Cacicus chrysopterus Tetrorchidium rubrivenium</i>  | 89.17 | -0.892 | high | Plant-skewed | 1 |

|                                                           |       |        |      |              |   |
|-----------------------------------------------------------|-------|--------|------|--------------|---|
| <i>Empidonomus varius Sapium glandulosum</i>              | 89.00 | -0.894 | high | Plant-skewed | 1 |
| <i>Turdus flavipes Merostachys sp</i>                     | 88.72 | -0.908 | high | Plant-skewed | 1 |
| <i>Euphonia pectoralis Melastomataceae sp</i>             | 88.43 | -0.842 | high | Plant-skewed | 1 |
| <i>Pteroglossus bailloni Sloanea guianensis</i>           | 88.34 | -0.828 | high | Plant-skewed | 1 |
| <i>Turdus albicollis Tetrorchidium rubrivenium</i>        | 88.03 | -0.906 | high | Plant-skewed | 1 |
| <i>Trogon rufus Alchornea triplinervia</i>                | 88.00 | 0.173  | high | Bird-skewed  | 1 |
| <i>Turdus flavipes Tetrorchidium rubrivenium</i>          | 87.91 | -0.907 | high | Plant-skewed | 1 |
| <i>Turdus flavipes Sapium glandulosum</i>                 | 87.91 | -0.907 | high | Plant-skewed | 1 |
| <i>Celeus flavescens Cybianthus peruvianus</i>            | 87.58 | -0.824 | high | Plant-skewed | 1 |
| <i>Camptostoma obsoletum Casearia sylvestris</i>          | 87.56 | -0.719 | high | Plant-skewed | 1 |
| <i>Tangara cayana Vismia brasiliensis</i>                 | 87.49 | -0.939 | high | Plant-skewed | 1 |
| <i>Euphonia pectoralis Sloanea guianensis</i>             | 87.44 | -0.840 | high | Plant-skewed | 1 |
| <i>Turdus amaurochalinus Sloanea hirsuta</i>              | 86.90 | -0.847 | high | Plant-skewed | 1 |
| <i>Turdus rufiventris Dendropanax cuneatus</i>            | 86.77 | -0.923 | high | Plant-skewed | 1 |
| <i>Trogon rufus Maytenus gonoclada</i>                    | 86.75 | 0.199  | high | Bird-skewed  | 1 |
| <i>Turdus rufiventris Sapium glandulosum</i>              | 86.68 | -0.923 | high | Plant-skewed | 1 |
| <i>Trogon viridis Coussapoa microcarpa</i>                | 86.65 | -0.464 | high | Plant-skewed | 1 |
| <i>Schistochlamys ruficapillus Vismia brasiliensis</i>    | 86.65 | -0.949 | high | Plant-skewed | 1 |
| <i>Attila rufus Sloanea guianensis</i>                    | 86.62 | -0.851 | high | Plant-skewed | 1 |
| <i>Chiroxiphia caudate Dendropanax cuneatus</i>           | 86.39 | -0.927 | high | Plant-skewed | 1 |
| <i>Lipaugus lanioides Melastomataceae sp</i>              | 86.31 | -0.870 | high | Plant-skewed | 1 |
| <i>Saltator similis Dendropanax cuneatus</i>              | 86.28 | -0.929 | high | Plant-skewed | 1 |
| <i>Myiarchus swainsoni Sapium glandulosum</i>             | 86.22 | -0.928 | high | Plant-skewed | 1 |
| <i>Myiarchus swainsoni Tetrorchidium rubrivenium</i>      | 86.22 | -0.928 | high | Plant-skewed | 1 |
| <i>Hemithraupis ruficapilla Tetrorchidium rubrivenium</i> | 86.06 | -0.930 | high | Plant-skewed | 1 |
| <i>Pipile jacutinga Coussapoa microcarpa</i>              | 85.41 | -0.486 | high | Plant-skewed | 1 |
| <i>Tyrannus melancholicus Sapium glandulosum</i>          | 85.29 | -0.940 | high | Plant-skewed | 1 |
| <i>Euphonia sp Sloanea guianensis</i>                     | 85.19 | -0.870 | high | Plant-skewed | 1 |
| <i>Orthogonyx chloricterus Melastomataceae sp</i>         | 85.14 | -0.885 | high | Plant-skewed | 1 |

|                                                         |       |        |      |              |   |
|---------------------------------------------------------|-------|--------|------|--------------|---|
| <i>Melanerpes flavifrons Michelia champaca</i>          | 84.71 | -0.779 | high | Plant-skewed | 1 |
| <i>Tachyphonus cristatus Sloanea guianensis</i>         | 84.52 | -0.879 | high | Plant-skewed | 1 |
| <i>Tolmomyias sulphurescens Casearia sylvestris</i>     | 84.45 | -0.764 | high | Plant-skewed | 1 |
| <i>Orthogonyx chloricterus Sloanea guianensis</i>       | 84.15 | -0.884 | high | Plant-skewed | 1 |
| <i>Cacicus chrysopterus Sloanea hirsuta</i>             | 84.10 | -0.884 | high | Plant-skewed | 2 |
| <i>Pipile jacutinga Phytolacca dioica</i>               | 84.00 | -0.473 | high | Plant-skewed | 1 |
| <i>Baryphthengus ruficapillus Nectandra membranacea</i> | 83.76 | 0.829  | high | Bird-skewed  | 1 |
| <i>Thraupis ornate Tetrorchidium rubrivenium</i>        | 83.71 | -0.959 | high | Plant-skewed | 1 |
| <i>Mimus gilvus Aechmea nudicaulis</i>                  | 83.63 | -0.685 | high | Plant-skewed | 1 |
| <i>Euphonia pectoralis Anthurium scandens</i>           | 83.62 | -0.831 | high | Plant-skewed | 1 |
| <i>Zonotrichia capensis Casearia sylvestris</i>         | 83.45 | -0.779 | high | Plant-skewed | 1 |
| <i>Manacus manacus Magnolia ovata</i>                   | 83.41 | -0.798 | high | Plant-skewed | 1 |
| <i>Cissopis leverianus Melastomataceae sp</i>           | 83.28 | -0.909 | high | Plant-skewed | 1 |
| <i>Euphonia violacea Anthurium scandens</i>             | 83.16 | -0.838 | high | Plant-skewed | 1 |
| <i>Saltator fuliginosus Sloanea guianensis</i>          | 83.02 | -0.899 | high | Plant-skewed | 1 |
| <i>Turdus albicollis Sloanea hirsuta</i>                | 82.96 | -0.899 | high | Plant-skewed | 1 |
| <i>Turdus flavipes Sloanea guianensis</i>               | 82.84 | -0.901 | high | Plant-skewed | 1 |
| <i>Dacnis cayana Sloanea guianensis</i>                 | 82.50 | -0.906 | high | Plant-skewed | 1 |
| <i>Dacnis cayana Sloanea hirsuta</i>                    | 82.50 | -0.906 | high | Plant-skewed | 1 |
| <i>Procnias nudicollis Sorocea bonplandii</i>           | 82.40 | -0.718 | high | Plant-skewed | 1 |
| <i>Cissopis leverianus Sloanea hirsuta</i>              | 82.30 | -0.908 | high | Plant-skewed | 1 |
| <i>Chiroxiphia caudate Melastomataceae sp</i>           | 82.22 | -0.923 | high | Plant-skewed | 1 |
| <i>Pitangus sulphuratus Magnolia ovata</i>              | 81.98 | -0.818 | high | Plant-skewed | 1 |
| <i>Turdus rufiventris Sloanea hirsuta</i>               | 81.61 | -0.917 | high | Plant-skewed | 1 |
| <i>Pyroderus scutatus Tapirira guianensis</i>           | 81.59 | -0.670 | high | Plant-skewed | 1 |
| <i>Cyclarhis gujanensis Rubus urticifolius</i>          | 81.56 | -0.075 | high | Plant-skewed | 1 |
| <i>Celeus flavescens Casearia sylvestris</i>            | 81.46 | -0.808 | high | Plant-skewed | 1 |
| <i>Nemosia pileata Casearia sylvestris</i>              | 81.41 | -0.809 | high | Plant-skewed | 1 |
| <i>Myiarchus swainsoni Sloanea hirsuta</i>              | 81.15 | -0.923 | high | Plant-skewed | 1 |
| <i>Saltator similis Sloanea hirsuta</i>                 | 81.13 | -0.924 | high | Plant-skewed | 1 |

|                                                      |       |        |      |              |   |
|------------------------------------------------------|-------|--------|------|--------------|---|
| <i>Tangara seledon Melastomataceae sp</i>            | 80.96 | -0.940 | high | Plant-skewed | 1 |
| <i>Pitangus sulphuratus Casearia sylvestris</i>      | 80.94 | -0.816 | high | Plant-skewed | 2 |
| <i>Tachyphonus coronatus Sloanea guianensis</i>      | 80.93 | -0.926 | high | Plant-skewed | 1 |
| <i>Turdus amaurochalinus Magnolia ovata</i>          | 80.91 | -0.834 | high | Plant-skewed | 1 |
| <i>Cyclarhis gujanensis Zanthoxylum fagara</i>       | 80.78 | -0.058 | high | Plant-skewed | 1 |
| <i>Thraupis cyanoptera Melastomataceae sp</i>        | 80.63 | -0.944 | high | Plant-skewed | 1 |
| <i>Turdus leucomelas Sloanea guianensis</i>          | 80.60 | -0.931 | high | Plant-skewed | 1 |
| <i>Penelope obscura Casearia sylvestris</i>          | 80.55 | -0.821 | high | Plant-skewed | 1 |
| <i>Mionectes rufiventris Casearia sylvestris</i>     | 80.44 | -0.823 | high | Plant-skewed | 1 |
| <i>Tangara cayana Sloanea guianensis</i>             | 80.40 | -0.933 | high | Plant-skewed | 1 |
| <i>Cyclarhis gujanensis Trema micrantha</i>          | 80.38 | -0.049 | high | Plant-skewed | 1 |
| <i>Tangara preciosa Sloanea hirsuta</i>              | 80.36 | -0.934 | high | Plant-skewed | 1 |
| <i>Tangara sp Sloanea guianensis</i>                 | 80.07 | -0.938 | high | Plant-skewed | 1 |
| <i>Selenidera maculirostris Coussapoa microcarpa</i> | 80.00 | -0.582 | high | Plant-skewed | 1 |
| <i>Tangara seledon Sloanea guianensis</i>            | 79.97 | -0.939 | high | Plant-skewed | 1 |
| <i>Turdus amaurochalinus Casearia sylvestris</i>     | 79.86 | -0.831 | high | Plant-skewed | 1 |
| <i>Tangara cyanocephala Melastomataceae sp</i>       | 79.73 | -0.956 | high | Plant-skewed | 1 |
| <i>Volatinia jacarina Casearia sylvestris</i>        | 79.68 | -0.834 | high | Plant-skewed | 1 |
| <i>Thraupis cyanoptera Sloanea guianensis</i>        | 79.64 | -0.943 | high | Plant-skewed | 1 |
| <i>Myiodynastes maculatus Casearia sylvestris</i>    | 79.34 | -0.839 | high | Plant-skewed | 3 |
| <i>Cyclarhis gujanensis Guapira opposita</i>         | 79.28 | -0.023 | high | Plant-skewed | 1 |
| <i>Cyclarhis gujanensis Alchornea triplinervia</i>   | 79.01 | -0.016 | high | Plant-skewed | 1 |
| <i>Tangara desmaresti Melastomataceae sp</i>         | 78.84 | -0.968 | high | Plant-skewed | 1 |
| <i>Trogon rufus Cabralea canjerana</i>               | 78.75 | 0.365  | high | Bird-skewed  | 1 |
| <i>Tangara cyanocephala Sloanea guianensis</i>       | 78.75 | -0.955 | high | Plant-skewed | 1 |
| <i>Thraupis ornate Sloanea hirsuta</i>               | 78.64 | -0.957 | high | Plant-skewed | 1 |
| <i>Crotophaga ani Rubus urticifolius</i>             | 78.59 | -0.146 | high | Plant-skewed | 1 |
| <i>Xolmis cinereus Casearia sylvestris</i>           | 78.51 | -0.851 | high | Plant-skewed | 1 |
| <i>Xolmis velatus Casearia sylvestris</i>            | 78.51 | -0.851 | high | Plant-skewed | 1 |
| <i>Mimus gilvus Schwartzia brasiliensis</i>          | 78.35 | -0.656 | high | Plant-skewed | 1 |
| <i>Coereba flaveola Casearia sylvestris</i>          | 78.01 | -0.858 | high | Plant-skewed | 1 |

|                                                                |       |        |      |              |   |
|----------------------------------------------------------------|-------|--------|------|--------------|---|
| <i>Tersina viridis</i> <i>Casearia sylvestris</i>              | 77.36 | -0.868 | high | Plant-skewed | 1 |
| <i>Myiozetetes similis</i> <i>Casearia sylvestris</i>          | 77.18 | -0.871 | high | Plant-skewed | 2 |
| <i>Thlypopsis sordida</i> <i>Casearia sylvestris</i>           | 76.97 | -0.874 | high | Plant-skewed | 1 |
| <i>Elaenia flavogaster</i> <i>Magnolia ovata</i>               | 76.96 | -0.891 | high | Plant-skewed | 1 |
| <i>Empidonomus varius</i> <i>Casearia sylvestris</i>           | 76.89 | -0.875 | high | Plant-skewed | 1 |
| <i>Pitangus sulphuratus</i> <i>Sorocea bonplandii</i>          | 76.86 | -0.804 | high | Plant-skewed | 1 |
| <i>Colaptes campestris</i> <i>Casearia sylvestris</i>          | 76.65 | -0.878 | high | Plant-skewed | 1 |
| <i>Pseudoleistes guirahuro</i> <i>Casearia sylvestris</i>      | 76.59 | -0.879 | high | Plant-skewed | 1 |
| <i>Dacnis cayana</i> <i>Magnolia ovata</i>                     | 76.50 | -0.897 | high | Plant-skewed | 1 |
| <i>Oxyruncus cristatus</i> <i>Trema micrantha</i>              | 76.36 | -0.147 | high | Plant-skewed | 1 |
| <i>Elaenia sp</i> <i>Casearia sylvestris</i>                   | 76.31 | -0.883 | high | Plant-skewed | 3 |
| <i>Turdus albicollis</i> <i>Casearia sylvestris</i>            | 75.92 | -0.889 | high | Plant-skewed | 2 |
| <i>Elaenia flavogaster</i> <i>Casearia sylvestris</i>          | 75.91 | -0.889 | high | Plant-skewed | 2 |
| <i>Euphonia violacea</i> <i>Tournefortia sp</i>                | 75.89 | -0.820 | high | Plant-skewed | 1 |
| <i>Euphonia violacea</i> <i>Sorocea bonplandii</i>             | 75.86 | -0.819 | high | Plant-skewed | 1 |
| <i>Turdus flavipes</i> <i>Casearia sylvestris</i>              | 75.79 | -0.891 | high | Plant-skewed | 1 |
| <i>Turdus amaurochalinus</i> <i>Sorocea bonplandii</i>         | 75.78 | -0.821 | high | Plant-skewed | 1 |
| <i>Selenidera maculirostris</i> <i>Heteropsis oblongifolia</i> | 75.61 | -0.547 | high | Plant-skewed | 1 |
| <i>Trichothraupis melanops</i> <i>Casearia sylvestris</i>      | 75.52 | -0.895 | high | Plant-skewed | 2 |
| <i>Trichothraupis melanops</i> <i>Casearia decandra</i>        | 75.52 | -0.895 | high | Plant-skewed | 1 |
| <i>Dacnis cayana</i> <i>Casearia sylvestris</i>                | 75.45 | -0.896 | high | Plant-skewed | 4 |
| <i>Tityra cayana</i> <i>Coussapoa microcarpa</i>               | 75.19 | -0.667 | high | Plant-skewed | 1 |
| <i>Oxyruncus cristatus</i> <i>Alchornea triplinervia</i>       | 74.99 | -0.117 | high | Plant-skewed | 1 |
| <i>Turdus rufiventris</i> <i>Casearia sylvestris</i>           | 74.57 | -0.909 | high | Plant-skewed | 2 |
| <i>Pipile jacutinga</i> <i>Cryptocarya mandioccana</i>         | 74.54 | -0.364 | high | Plant-skewed | 1 |
| <i>Coryphospingus cucullatus</i> <i>Casearia sylvestris</i>    | 74.52 | -0.909 | high | Plant-skewed | 1 |
| <i>Trogon viridis</i> <i>Rubus sp</i>                          | 74.36 | -0.315 | high | Plant-skewed | 1 |
| <i>Tyrannus melancholicus</i> <i>Magnolia ovata</i>            | 74.23 | -0.930 | high | Plant-skewed | 1 |
| <i>Megarynchus pitangua</i> <i>Sorocea bonplandii</i>          | 74.19 | -0.845 | high | Plant-skewed | 1 |
| <i>Ramphocelus carbo</i> <i>Magnolia ovata</i>                 | 74.14 | -0.931 | high | Plant-skewed | 1 |



|                                                          |       |        |      |              |   |
|----------------------------------------------------------|-------|--------|------|--------------|---|
| <i>Saltator similis Casearia sylvestris</i>              | 74.08 | -0.916 | high | Plant-skewed | 2 |
| <i>Hemithraupis ruficapilla Casearia sylvestris</i>      | 73.95 | -0.918 | high | Plant-skewed | 1 |
| <i>Tachyphonus coronatus Casearia sylvestris</i>         | 73.89 | -0.919 | high | Plant-skewed | 4 |
| <i>Euphonia chlorotica Aechmea nudicaulis</i>            | 73.70 | -0.841 | high | Plant-skewed | 1 |
| <i>Oxyruncus cristatus Tabernaemontana catharinensis</i> | 73.67 | -0.087 | high | Plant-skewed | 1 |
| <i>Myiarchus ferox Casearia sylvestris</i>               | 73.57 | -0.923 | high | Plant-skewed | 1 |
| <i>Turdus leucomelas Casearia sylvestris</i>             | 73.56 | -0.924 | high | Plant-skewed | 2 |
| <i>Tangara cayana Casearia sylvestris</i>                | 73.36 | -0.926 | high | Plant-skewed | 2 |
| <i>Tangara preciosa Casearia decandra</i>                | 73.31 | -0.927 | high | Plant-skewed | 1 |
| <i>Myiarchus sp Casearia sylvestris</i>                  | 73.30 | -0.927 | high | Plant-skewed | 1 |
| <i>Tyrannus savana Casearia sylvestris</i>               | 73.18 | -0.929 | high | Plant-skewed | 1 |
| <i>Tyrannus melancholicus Casearia sylvestris</i>        | 73.18 | -0.929 | high | Plant-skewed | 1 |
| <i>Ramphocelus carbo Casearia sylvestris</i>             | 73.09 | -0.930 | high | Plant-skewed | 1 |
| <i>Cacicus haemorrhous Sorocea bonplandii</i>            | 72.98 | -0.864 | high | Plant-skewed | 1 |
| <i>Pipile jacutinga Curatella americana</i>              | 72.83 | -0.339 | high | Plant-skewed | 1 |
| <i>Trogon viridis Rubus urticifolius</i>                 | 72.61 | -0.287 | high | Plant-skewed | 1 |
| <i>Trogon viridis Rubus rosifolius</i>                   | 72.61 | -0.287 | high | Plant-skewed | 1 |
| <i>Thraupis cyanoptera Casearia decandra</i>             | 72.60 | -0.938 | high | Plant-skewed | 1 |
| <i>Pipile jacutinga Cordia silvestris</i>                | 72.41 | -0.333 | high | Plant-skewed | 2 |
| <i>Stephanophorus diadematus Aureliana fasciculata</i>   | 72.11 | -0.845 | high | Plant-skewed | 1 |
| <i>Cyclarhis gujanensis Erythroxylum deciduum</i>        | 72.03 | 0.162  | high | Bird-skewed  | 1 |
| <i>Turdus flavipes Sorocea bonplandii</i>                | 71.71 | -0.884 | high | Plant-skewed | 1 |
| <i>Pipile jacutinga Pourouma guianensis</i>              | 71.71 | -0.322 | high | Plant-skewed | 1 |
| <i>Trogon viridis Neomitranthes glomerata</i>            | 71.54 | -0.268 | high | Plant-skewed | 1 |
| <i>Pipile jacutinga Annona neosericea</i>                | 71.47 | -0.318 | high | Plant-skewed | 1 |
| <i>Selenidera maculirostris Cryptocarya moschata</i>     | 71.39 | -0.507 | high | Plant-skewed | 1 |
| <i>Lipaugus lanioides Tapirira guianensis</i>            | 71.27 | -0.838 | high | Plant-skewed | 1 |
| <i>Ramphastos dicolorus Tapirira guianensis</i>          | 71.17 | -0.839 | high | Plant-skewed | 1 |
| <i>Thraupis sayaca Casearia sylvestris</i>               | 71.11 | -0.959 | high | Plant-skewed | 3 |

|                                                           |       |        |      |              |   |
|-----------------------------------------------------------|-------|--------|------|--------------|---|
| <i>Thraupis episcopus Casearia sylvestris</i>             | 71.10 | -0.959 | high | Plant-skewed | 1 |
| <i>Tangara mexicana Sorocea bonplandii</i>                | 70.82 | -0.898 | high | Plant-skewed | 1 |
| <i>Trogon rufus Cupania vernalis</i>                      | 70.82 | 0.530  | high | Bird-skewed  | 1 |
| <i>Tangara cyanoventris Casearia sylvestris</i>           | 70.80 | -0.964 | high | Plant-skewed | 1 |
| <i>Selenidera maculirostris Cryptocarya aschersoniana</i> | 70.25 | -0.495 | high | Plant-skewed | 1 |
| <i>Vireo olivaceus Schefflera angustissima</i>            | 70.14 | -0.379 | high | Plant-skewed | 1 |
| <i>Pteroglossus bailloni Prunus myrtifolia</i>            | 70.09 | -0.773 | high | Plant-skewed | 1 |
| <i>Trogon viridis Alchornea triplinervia</i>              | 70.06 | -0.241 | high | Plant-skewed | 1 |
| <i>Hemithraupis ruficapilla Tournefortia sp</i>           | 69.90 | -0.913 | high | Plant-skewed | 1 |
| <i>Myiodynastes maculatus Maclura tinctoria</i>           | 69.87 | -0.813 | high | Plant-skewed | 1 |
| <i>Vireo olivaceus Varronia curassavica</i>               | 69.79 | -0.374 | high | Plant-skewed | 1 |
| <i>Cyclarhis gujanensis Cabralea canjerana</i>            | 69.77 | 0.219  | high | Bird-skewed  | 1 |
| <i>Turdus fumigatus Sorocea bonplandii</i>                | 69.49 | -0.918 | high | Plant-skewed | 1 |
| <i>Pteroglossus bailloni Coussapoa microcarpa</i>         | 69.38 | -0.770 | high | Plant-skewed | 1 |
| <i>Trogon viridis Alchornea glandulosa</i>                | 69.31 | -0.226 | high | Plant-skewed | 1 |
| <i>Habia rubica Monstera adansonii</i>                    | 69.09 | -0.663 | high | Plant-skewed | 1 |
| <i>Cyclarhis gujanensis Symplocos uniflora</i>            | 69.06 | 0.237  | high | Bird-skewed  | 1 |
| <i>Elaenia sp Cissus striata</i>                          | 68.76 | -0.869 | high | Plant-skewed | 1 |
| <i>Turdus rufiventris Aureliana fasciculata</i>           | 68.65 | -0.900 | high | Plant-skewed | 1 |
| <i>Penelope obscura Coussapoa microcarpa</i>              | 68.64 | -0.784 | high | Plant-skewed | 1 |
| <i>Euphonia pectoralis Coussapoa microcarpa</i>           | 68.49 | -0.786 | high | Plant-skewed | 1 |
| <i>Vireo olivaceus Zanthoxylum fagara</i>                 | 68.46 | -0.354 | high | Plant-skewed | 1 |
| <i>Manacus manacus Henriettea saldanhae</i>               | 68.25 | -0.741 | high | Plant-skewed | 1 |
| <i>Trogon viridis Myrtaceae sp</i>                        | 68.23 | -0.204 | high | Plant-skewed | 1 |
| <i>Vireo olivaceus Trema micrantha</i>                    | 68.07 | -0.348 | high | Plant-skewed | 3 |
| <i>Euphonia violacea Coussapoa microcarpa</i>             | 68.03 | -0.794 | high | Plant-skewed | 1 |
| <i>Vireo olivaceus Aegiphila integrifolia</i>             | 67.91 | -0.345 | high | Plant-skewed | 2 |
| <i>Tangara cyanocephala Tournefortia sp</i>               | 67.66 | -0.948 | high | Plant-skewed | 1 |
| <i>Pipile jacutinga Citharexylum myrianthum</i>           | 67.55 | -0.248 | high | Plant-skewed | 1 |
| <i>Myiodynastes maculatus Coussapoa</i>                   | 67.43 | -0.805 | high | Plant-skewed | 1 |

*microcarpa*

|                                                         |       |        |      |              |   |
|---------------------------------------------------------|-------|--------|------|--------------|---|
| <i>Schiffornis virescens Rubus rosifolius</i>           | 67.33 | -0.411 | high | Plant-skewed | 1 |
| <i>Euphonia pectoralis Phytolacca dioica</i>            | 67.08 | -0.781 | high | Plant-skewed | 1 |
| <i>Thraupis sayaca Sorocea bonplandii</i>               | 67.04 | -0.957 | high | Plant-skewed | 1 |
| <i>Selenidera maculirostris Cordia silvestris</i>       | 67.00 | -0.457 | high | Plant-skewed | 1 |
| <i>Ramphastos dicolorus Prunus myrtifolia</i>           | 66.98 | -0.828 | high | Plant-skewed | 1 |
| <i>Selenidera maculirostris Schefflera angustissima</i> | 66.84 | -0.455 | high | Plant-skewed | 1 |
| <i>Vireo olivaceus Alchornea triplinervia</i>           | 66.70 | -0.325 | high | Plant-skewed | 1 |
| <i>Trogon viridis Virola bicuhyba</i>                   | 66.49 | -0.166 | high | Plant-skewed | 2 |
| <i>Pipile jacutinga Byrsonima ligustrifolia</i>         | 66.37 | -0.225 | high | Plant-skewed | 1 |
| <i>Lipaugus lanioides Coussapoa microcarpa</i>          | 66.37 | -0.824 | high | Plant-skewed | 1 |
| <i>Ramphastos dicolorus Coussapoa microcarpa</i>        | 66.27 | -0.825 | high | Plant-skewed | 1 |
| <i>Pipile jacutinga Virola gardneri</i>                 | 66.24 | -0.222 | high | Plant-skewed | 1 |
| <i>Selenidera maculirostris Annona neosericea</i>       | 66.06 | -0.445 | high | Plant-skewed | 1 |
| <i>Vireo olivaceus Alchornea glandulosa</i>             | 65.94 | -0.312 | high | Plant-skewed | 1 |
| <i>Euphonia violacea Henriettea saldanhae</i>           | 65.82 | -0.786 | high | Plant-skewed | 1 |
| <i>Pyroderus scutatus Cryptocarya mandioccana</i>       | 65.81 | -0.555 | high | Plant-skewed | 1 |
| <i>Oxyruncus cristatus Cabralea canjerana</i>           | 65.74 | 0.130  | high | Bird-skewed  | 1 |
| <i>Orchesticus abeillei Coussapoa microcarpa</i>        | 65.65 | -0.837 | high | Plant-skewed | 1 |
| <i>Selenidera maculirostris Ouratea vaccinioides</i>    | 65.47 | -0.437 | high | Plant-skewed | 1 |
| <i>Euphonia violacea Piper corintoanum</i>              | 65.46 | -0.785 | high | Plant-skewed | 1 |
| <i>Vireo olivaceus Citharexylum myrianthum</i>          | 65.44 | -0.303 | high | Plant-skewed | 1 |
| <i>Cyclarhis gujanensis Protium heptaphyllum</i>        | 65.42 | 0.330  | high | Bird-skewed  | 1 |
| <i>Pipile jacutinga Virola bicuhyba</i>                 | 65.24 | -0.201 | high | Plant-skewed | 2 |
| <i>Orthogonys chloricterus Coussapoa microcarpa</i>     | 65.19 | -0.845 | high | Plant-skewed | 1 |
| <i>Cacicus haemorrhous Coussapoa microcarpa</i>         | 65.15 | -0.845 | high | Plant-skewed | 1 |
| <i>Ramphastos dicolorus Phytolacca dioica</i>           | 64.86 | -0.821 | high | Plant-skewed | 1 |
| <i>Ramphastos vitellinus Phytolacca dioica</i>          | 64.85 | -0.821 | high | Plant-skewed | 1 |
| <i>Selenidera maculirostris Trema micrantha</i>         | 64.77 | -0.428 | high | Plant-skewed | 1 |
| <i>Vireo olivaceus Alchornea sidifolia</i>              | 64.46 | -0.285 | high | Plant-skewed | 1 |

|                                                         |       |        |      |              |   |
|---------------------------------------------------------|-------|--------|------|--------------|---|
| <i>Picumnus cirratus Aegiphila integrifolia</i>         | 64.37 | -0.432 | high | Plant-skewed | 1 |
| <i>Turdus albicollis Coussapoa microcarpa</i>           | 64.01 | -0.866 | high | Plant-skewed | 1 |
| <i>Turdus flavipes Coussapoa microcarpa</i>             | 63.88 | -0.868 | high | Plant-skewed | 1 |
| <i>Selenidera maculirostris Guapira opposita</i>        | 63.67 | -0.412 | high | Plant-skewed | 1 |
| <i>Saltator maximus Henriettea saldanhae</i>            | 63.64 | -0.826 | high | Plant-skewed | 1 |
| <i>Trichothraupis melanops Coussapoa microcarpa</i>     | 63.61 | -0.873 | high | Plant-skewed | 1 |
| <i>Empidonomus varius Phytolacca dioica</i>             | 63.57 | -0.845 | high | Plant-skewed | 1 |
| <i>Dacnis cayana Coussapoa microcarpa</i>               | 63.54 | -0.874 | high | Plant-skewed | 1 |
| <i>Turdus rufiventris Prunus myrtifolia</i>             | 63.36 | -0.891 | high | Plant-skewed | 1 |
| <i>Turdus rufiventris Prunus sellowii</i>               | 63.36 | -0.891 | high | Plant-skewed | 1 |
| <i>Mimus gilvus Varronia curassavica</i>                | 62.97 | -0.533 | high | Plant-skewed | 1 |
| <i>Saltator similis Prunus myrtifolia</i>               | 62.88 | -0.899 | high | Plant-skewed | 1 |
| <i>Turdus rufiventris Coussapoa microcarpa</i>          | 62.66 | -0.890 | high | Plant-skewed | 1 |
| <i>Selenidera maculirostris Alchornea glandulosa</i>    | 62.65 | -0.397 | high | Plant-skewed | 1 |
| <i>Selenidera maculirostris Maytenus brasiliensis</i>   | 62.64 | -0.397 | high | Plant-skewed | 1 |
| <i>Habia rubica Urera baccifera</i>                     | 62.49 | -0.614 | high | Plant-skewed | 1 |
| <i>Pipile jacutinga Cupania oblongifolia</i>            | 62.43 | -0.133 | high | Plant-skewed | 1 |
| <i>Euphonia pectoralis Codonanthe cordifolia</i>        | 62.39 | -0.760 | high | Plant-skewed | 1 |
| <i>Chiroxiphia caudate Coussapoa microcarpa</i>         | 62.28 | -0.896 | high | Plant-skewed | 1 |
| <i>Selenidera maculirostris Maytenus gonoclada</i>      | 62.15 | -0.389 | high | Plant-skewed | 1 |
| <i>Camptostoma obsoletum Varronia curassavica</i>       | 62.15 | -0.552 | high | Plant-skewed | 1 |
| <i>Selenidera maculirostris Citharexylum myrianthum</i> | 62.14 | -0.389 | high | Plant-skewed | 1 |
| <i>Turdus subalaris Styryx leprosus</i>                 | 62.08 | -0.682 | high | Plant-skewed | 1 |
| <i>Hemithraupis ruficapilla Coussapoa microcarpa</i>    | 62.04 | -0.901 | high | Plant-skewed | 1 |
| <i>Tachyphonus coronatus Coussapoa microcarpa</i>       | 61.98 | -0.902 | high | Plant-skewed | 1 |
| <i>Pipile jacutinga Byrsonima cydoniifolia</i>          | 61.71 | -0.114 | high | Plant-skewed | 1 |
| <i>Thraupis sayaca Maclura tinctoria</i>                | 61.64 | -0.953 | high | Plant-skewed | 2 |
| <i>Trogon surrucura Rubus sp</i>                        | 61.27 | -0.612 | high | Plant-skewed | 1 |
| <i>Turdus rufiventris Phytolacca dioica</i>             | 61.25 | -0.887 | high | Plant-skewed | 1 |

|                                                     |       |        |      |              |   |
|-----------------------------------------------------|-------|--------|------|--------------|---|
| <i>Tangara seledon Coussapoa microcarpa</i>         | 61.01 | -0.919 | high | Plant-skewed | 1 |
| <i>Selenidera maculirostris Virola gardneri</i>     | 60.83 | -0.367 | high | Plant-skewed | 1 |
| <i>Crotophaga ani Schinus terebinthifolia</i>       | 60.72 | 0.323  | high | Bird-skewed  | 1 |
| <i>Carpornis cucullata Schefflera angustissima</i>  | 60.65 | -0.598 | high | Plant-skewed | 1 |
| <i>Cyclarhis gujanensis Persea willdenovii</i>      | 60.62 | 0.453  | high | Bird-skewed  | 1 |
| <i>Camptostoma obsoletum Trema micrantha</i>        | 60.43 | -0.533 | high | Plant-skewed | 1 |
| <i>Trogon rufus Alibertia sp</i>                    | 60.39 | 0.746  | high | Bird-skewed  | 1 |
| <i>Myiophobus fasciatus Varronia curassavica</i>    | 60.22 | -0.597 | high | Plant-skewed | 1 |
| <i>Penelope obscura Cryptocarya moschata</i>        | 60.03 | -0.745 | high | Plant-skewed | 1 |
| <i>Tityra cayana Trema micrantha</i>                | 59.97 | -0.545 | high | Plant-skewed | 1 |
| <i>Trogon viridis Symplocos sp</i>                  | 59.88 | 0.019  | high | Bird-skewed  | 1 |
| <i>Selenidera maculirostris Virola bicuhyba</i>     | 59.83 | -0.350 | high | Plant-skewed | 3 |
| <i>Tangara cyanocephala Coussapoa microcarpa</i>    | 59.79 | -0.940 | high | Plant-skewed | 1 |
| <i>Habia rubica Rubus rosifolius</i>                | 59.79 | -0.589 | high | Plant-skewed | 1 |
| <i>Dacnis cayana Davilla rugosa</i>                 | 59.76 | -0.865 | high | Plant-skewed | 1 |
| <i>Carpornis cucullata Rubus urticifolius</i>       | 59.76 | -0.590 | high | Plant-skewed | 1 |
| <i>Vireo olivaceus Erythroxylum deciduum</i>        | 59.72 | -0.182 | high | Plant-skewed | 1 |
| <i>Chiroxiphia caudate Piper corintoanum</i>        | 59.71 | -0.891 | high | Plant-skewed | 1 |
| <i>Selenidera maculirostris Coussarea contracta</i> | 59.70 | -0.348 | high | Plant-skewed | 1 |
| <i>Thraupis ornate Coussapoa microcarpa</i>         | 59.68 | -0.942 | high | Plant-skewed | 1 |
| <i>Trogon sarrucura Rubus rosifolius</i>            | 59.52 | -0.596 | high | Plant-skewed | 1 |
| <i>Selenidera maculirostris Maytenus aquifolia</i>  | 59.48 | -0.344 | high | Plant-skewed | 1 |
| <i>Tachyphonus coronatus Piper corintoanum</i>      | 59.41 | -0.897 | high | Plant-skewed | 1 |
| <i>Thraupis cyanoptera Phytolacca dioica</i>        | 59.28 | -0.923 | high | Plant-skewed | 1 |
| <i>Manacus manacus Urera baccifera</i>              | 59.12 | -0.689 | high | Plant-skewed | 1 |
| <i>Tolmomyias flaviventris Varronia curassavica</i> | 59.04 | -0.624 | high | Plant-skewed | 1 |
| <i>Mionectes rufiventris Loranthaceae sp</i>        | 59.00 | -0.742 | high | Plant-skewed | 1 |
| <i>Conopias trivirgatus Alchornea glandulosa</i>    | 58.99 | -0.490 | high | Plant-skewed | 1 |
| <i>Tangara desmaresti Coussapoa microcarpa</i>      | 58.90 | -0.956 | high | Plant-skewed | 1 |
| <i>Pyroderus scutatus Maytenus gonoclada</i>        | 58.84 | -0.475 | high | Plant-skewed | 1 |
| <i>Pyroderus scutatus Citharexylum myrianthum</i>   | 58.83 | -0.475 | high | Plant-skewed | 1 |

|                                                                |       |        |      |              |   |
|----------------------------------------------------------------|-------|--------|------|--------------|---|
| <i>Trichothraupis melanops Heteropsis rigidifolia</i>          | 58.76 | -0.861 | high | Plant-skewed | 1 |
| <i>Carpornis cucullata Neomitranthes glomerata</i>             | 58.69 | -0.579 | high | Plant-skewed | 1 |
| <i>Pipile jacutinga Symplocos sp</i>                           | 58.63 | -0.022 | high | Plant-skewed | 1 |
| <i>Habia rubica Trema micrantha</i>                            | 58.61 | -0.577 | high | Plant-skewed | 1 |
| <i>Tityra cayana Alchornea triplinervia</i>                    | 58.60 | -0.529 | high | Plant-skewed | 1 |
| <i>Elaenia mesoleuca Davilla rugosa</i>                        | 58.59 | -0.887 | high | Plant-skewed | 1 |
| <i>Carpornis cucullata Trema micrantha</i>                     | 58.58 | -0.578 | high | Plant-skewed | 1 |
| <i>Selenidera maculirostris Margaritopsis<br/>astrellantha</i> | 58.34 | -0.322 | high | Plant-skewed | 1 |
| <i>Serpophaga subcristata Trema micrantha</i>                  | 58.29 | -0.585 | high | Plant-skewed | 1 |
| <i>Pachyramphus polychopterus Varronia<br/>curassavica</i>     | 58.28 | -0.642 | high | Plant-skewed | 1 |
| <i>Procnias nudicollis Guapira opposita</i>                    | 58.25 | -0.547 | high | Plant-skewed | 1 |
| <i>Cyclarhis gujanensis Ilex brevicuspis</i>                   | 58.15 | 0.516  | high | Bird-skewed  | 1 |
| <i>Stephanophorus diadematus Peplonia<br/>organensis</i>       | 57.89 | -0.799 | high | Plant-skewed | 1 |
| <i>Tityra cayana Alchornea glandulosa</i>                      | 57.84 | -0.520 | high | Plant-skewed | 1 |
| <i>Ramphastos dicolorus Cryptocarya moschata</i>               | 57.67 | -0.794 | high | Plant-skewed | 1 |
| <i>Ramphastos vitellinus Cryptocarya moschata</i>              | 57.65 | -0.794 | high | Plant-skewed | 1 |
| <i>Selenidera maculirostris Marcgravia polyantha</i>           | 57.60 | -0.307 | high | Plant-skewed | 1 |
| <i>Pyroderus scutatus Virola gardneri</i>                      | 57.52 | -0.456 | high | Plant-skewed | 1 |
| <i>Carpornis cucullata Guapira opposita</i>                    | 57.48 | -0.567 | high | Plant-skewed | 1 |
| <i>Vireo olivaceus Cabralea canjerana</i>                      | 57.45 | -0.121 | high | Plant-skewed | 2 |
| <i>Tolmomyias sulphurescens Trema micrantha</i>                | 57.32 | -0.609 | high | Plant-skewed | 1 |
| <i>Carpornis cucullata Alchornea triplinervia</i>              | 57.21 | -0.564 | high | Plant-skewed | 1 |
| <i>Euphonia pectoralis Urera baccifera</i>                     | 57.15 | -0.732 | high | Plant-skewed | 1 |
| <i>Trogon sarrucura Alchornea triplinervia</i>                 | 56.97 | -0.570 | high | Plant-skewed | 2 |
| <i>Geothlypis aequinoctialis Trema micrantha</i>               | 56.74 | -0.623 | high | Plant-skewed | 1 |
| <i>Pachyramphus validus Trema micrantha</i>                    | 56.63 | -0.625 | high | Plant-skewed | 1 |
| <i>Pachyramphus castaneus Trema micrantha</i>                  | 56.57 | -0.627 | high | Plant-skewed | 1 |
| <i>Pyroderus scutatus Virola bicuhyba</i>                      | 56.52 | -0.441 | high | Plant-skewed | 1 |

|                                                                 |       |        |      |              |   |
|-----------------------------------------------------------------|-------|--------|------|--------------|---|
| <i>Trogon viridis</i> <i>Protium heptaphyllum</i>               | 56.47 | 0.132  | high | Bird-skewed  | 1 |
| <i>Hylophilus amaurocephalus</i> <i>Aegiphila integrifolia</i>  | 56.44 | -0.625 | high | Plant-skewed | 1 |
| <i>Oxyruncus cristatus</i> <i>Myrsine coriacea</i>              | 56.38 | 0.397  | high | Bird-skewed  | 1 |
| <i>Zonotrichia capensis</i> <i>Trema micrantha</i>              | 56.32 | -0.633 | high | Plant-skewed | 1 |
| <i>Phyllomyias griseocapilla</i> <i>Alchornea triplinervia</i>  | 56.22 | -0.589 | high | Plant-skewed | 1 |
| <i>Trogon surrucura</i> <i>Alchornea glandulosa</i>             | 56.21 | -0.561 | high | Plant-skewed | 1 |
| <i>Phylloscartes ventralis</i> <i>Alchornea triplinervia</i>    | 56.14 | -0.590 | high | Plant-skewed | 1 |
| <i>Pipraeidea melanonota</i> <i>Urera baccifera</i>             | 56.10 | -0.756 | high | Plant-skewed | 1 |
| <i>Nemosia pileata</i> <i>Varronia curassavica</i>              | 55.99 | -0.695 | high | Plant-skewed | 1 |
| <i>Carpornis cucullata</i> <i>Maytenus gonoclada</i>            | 55.96 | -0.550 | high | Plant-skewed | 2 |
| <i>Tolmomyias sulphurescens</i> <i>Alchornea triplinervia</i>   | 55.95 | -0.595 | high | Plant-skewed | 1 |
| <i>Carpornis melanocephala</i> <i>Citharexylum myrianthum</i>   | 55.95 | -0.549 | high | Plant-skewed | 1 |
| <i>Manacus manacus</i> <i>Ouratea polygyna</i>                  | 55.92 | -0.665 | high | Plant-skewed | 1 |
| <i>Carpornis cucullata</i> <i>Tabernaemontana catharinensis</i> | 55.89 | -0.549 | high | Plant-skewed | 1 |
| <i>Chlorophonia cyanea</i> <i>Myrrhinium atropurpureum</i>      | 55.86 | -0.634 | high | Plant-skewed | 1 |
| <i>Cacicus chrysopterus</i> <i>Styrax leprosus</i>              | 55.82 | -0.815 | high | Plant-skewed | 1 |
| <i>Carpornis melanocephala</i> <i>Maytenus sp</i>               | 55.81 | -0.548 | high | Plant-skewed | 1 |
| <i>Carpornis cucullata</i> <i>Maytenus sp</i>                   | 55.81 | -0.548 | high | Plant-skewed | 1 |
| <i>Satrapa icterophrys</i> <i>Varronia curassavica</i>          | 55.65 | -0.703 | high | Plant-skewed | 1 |
| <i>Schiffornis virescens</i> <i>Cabralea canjerana</i>          | 55.53 | -0.184 | high | Plant-skewed | 1 |
| <i>Tachyphonus coronatus</i> <i>Piper sp</i>                    | 55.45 | -0.889 | high | Plant-skewed | 2 |
| <i>Elaenia obscura</i> <i>Rubus urticifolius</i>                | 55.38 | -0.693 | high | Plant-skewed | 1 |
| <i>Pachyramphus viridis</i> <i>Alchornea triplinervia</i>       | 55.26 | -0.613 | high | Plant-skewed | 1 |
| <i>Manacus manacus</i> <i>Trema micrantha</i>                   | 55.23 | -0.659 | high | Plant-skewed | 2 |
| <i>Pachyramphus polychopterus</i> <i>Alchornea triplinervia</i> | 55.20 | -0.614 | high | Plant-skewed | 1 |

|                                                          |       |        |      |              |   |
|----------------------------------------------------------|-------|--------|------|--------------|---|
| <i>Pachyramphus castaneus Alchornea triplinervia</i>     | 55.20 | -0.614 | high | Plant-skewed | 1 |
| <i>Hylophilus poicilotis Alchornea triplinervia</i>      | 55.19 | -0.614 | high | Plant-skewed | 2 |
| <i>Icterus cayanensis Trema micrantha</i>                | 55.15 | -0.661 | high | Plant-skewed | 1 |
| <i>Trogon sarrucura Myrtaceae sp</i>                     | 55.14 | -0.549 | high | Plant-skewed | 1 |
| <i>Trogon viridis Cecropia pachystachya</i>              | 55.10 | 0.177  | high | Bird-skewed  | 1 |
| <i>Manacus manacus Aegiphila integrifolia</i>            | 55.07 | -0.658 | high | Plant-skewed | 1 |
| <i>Tityra cayana Virola bicuhyba</i>                     | 55.02 | -0.482 | high | Plant-skewed | 1 |
| <i>Coereba flaveola Urera baccifera</i>                  | 54.77 | -0.785 | high | Plant-skewed | 1 |
| <i>Turdus albicollis Styrox leprosus</i>                 | 54.68 | -0.839 | high | Plant-skewed | 1 |
| <i>Trogon viridis Cecropia glaziovii</i>                 | 54.67 | 0.192  | high | Bird-skewed  | 1 |
| <i>Legatus leucophaeus Citharexylum myrianthum</i>       | 54.62 | -0.584 | high | Plant-skewed | 1 |
| <i>Penelope obscura Rubus urticifolius</i>               | 54.59 | -0.712 | high | Plant-skewed | 1 |
| <i>Cyclarhis gujanensis Trichilia clauseni</i>           | 54.58 | 0.607  | high | Bird-skewed  | 1 |
| <i>Euphonia violacea Varronia curassavica</i>            | 54.52 | -0.730 | high | Plant-skewed | 1 |
| <i>Pachyramphus validus Alchornea glandulosa</i>         | 54.51 | -0.605 | high | Plant-skewed | 1 |
| <i>Procnias nudicollis Virola bicuhyba</i>               | 54.40 | -0.500 | high | Plant-skewed | 2 |
| <i>Pipile jacutinga Protium widgrenii</i>                | 54.29 | 0.127  | high | Bird-skewed  | 1 |
| <i>Nemosia pileata Trema micrantha</i>                   | 54.27 | -0.683 | high | Plant-skewed | 1 |
| <i>Volatinia jacarina Varronia curassavica</i>           | 54.27 | -0.736 | high | Plant-skewed | 1 |
| <i>Trogon rufus Rhipsalis camposportoana</i>             | 54.19 | 0.875  | high | Bird-skewed  | 1 |
| <i>Pteroglossus bailloni Trema micrantha</i>             | 54.16 | -0.685 | high | Plant-skewed | 1 |
| <i>Selenidera maculirostris Cabralea canjerana</i>       | 54.16 | -0.229 | high | Plant-skewed | 1 |
| <i>Ilicura militaris Alchornea triplinervia</i>          | 54.11 | -0.642 | high | Plant-skewed | 1 |
| <i>Procnias nudicollis Ilex theezans</i>                 | 54.09 | -0.495 | high | Plant-skewed | 1 |
| <i>Thamnophilus caerulescens Schinus terebinthifolia</i> | 54.07 | 0.171  | high | Bird-skewed  | 1 |
| <i>Mionectes rufiventris Ouratea vaccinioides</i>        | 54.00 | -0.711 | high | Plant-skewed | 1 |
| <i>Pipraeidea melanonota Varronia curassavica</i>        | 53.93 | -0.743 | high | Plant-skewed | 1 |
| <i>Pipile jacutinga Cecropia pachystachya</i>            | 53.85 | 0.142  | high | Bird-skewed  | 1 |
| <i>Myiodynastes maculatus Myriopus paniculatus</i>       | 53.83 | -0.743 | high | Plant-skewed | 1 |
| <i>Stephanophorus diadematus Rubus sp</i>                | 53.83 | -0.780 | high | Plant-skewed | 1 |



|                                                      |       |        |      |              |   |
|------------------------------------------------------|-------|--------|------|--------------|---|
| <i>Cacicus haemorrhous Urera baccifera</i>           | 53.81 | -0.806 | high | Plant-skewed | 1 |
| <i>Pitangus sulphuratus Trema micrantha</i>          | 53.80 | -0.694 | high | Plant-skewed | 1 |
| <i>Pitangus sulphuratus Aegiphila integrifolia</i>   | 53.65 | -0.693 | high | Plant-skewed | 1 |
| <i>Penelope obscura Neomitranthes glomerata</i>      | 53.52 | -0.704 | high | Plant-skewed | 1 |
| <i>Pteroglossus bailloni Maytenus littoralis</i>     | 53.52 | -0.681 | high | Plant-skewed | 1 |
| <i>Mimus saturninus Cupania oblongifolia</i>         | 53.49 | -0.401 | high | Plant-skewed | 1 |
| <i>Selenidera maculirostris Symplocos uniflora</i>   | 53.45 | -0.211 | high | Plant-skewed | 1 |
| <i>Pipile jacutinga Cecropia glaziovii</i>           | 53.42 | 0.157  | high | Bird-skewed  | 2 |
| <i>Penelope obscura Celtis iguanaea</i>              | 53.41 | -0.704 | high | Plant-skewed | 1 |
| <i>Trogon surrucura Virola bicuhyba</i>              | 53.39 | -0.527 | high | Plant-skewed | 1 |
| <i>Mionectes rufiventris Trema micrantha</i>         | 53.31 | -0.706 | high | Plant-skewed | 1 |
| <i>Mionectes oleaginous Trema micrantha</i>          | 53.31 | -0.706 | high | Plant-skewed | 1 |
| <i>Euphonia pectoralis Trema micrantha</i>           | 53.26 | -0.707 | high | Plant-skewed | 1 |
| <i>Penelope obscura Piper aduncum</i>                | 53.24 | -0.702 | high | Plant-skewed | 1 |
| <i>Veniliornis spilogaster Erythroxylum deciduum</i> | 53.23 | -0.379 | high | Plant-skewed | 1 |
| <i>Lipaugus lanioides Schefflera angustissima</i>    | 53.21 | -0.770 | high | Plant-skewed | 1 |
| <i>Mionectes oleaginous Aegiphila integrifolia</i>   | 53.15 | -0.705 | high | Plant-skewed | 1 |
| <i>Oxyruncus cristatus Myrsine umbellata</i>         | 53.00 | 0.492  | high | Bird-skewed  | 1 |
| <i>Cyanerpes cyaneus Varronia curassavica</i>        | 52.96 | -0.766 | high | Plant-skewed | 1 |
| <i>Mimus saturninus Erythroxylum deciduum</i>        | 52.90 | -0.390 | high | Plant-skewed | 1 |
| <i>Trogon viridis Cupania vernalis</i>               | 52.88 | 0.251  | high | Bird-skewed  | 1 |
| <i>Pteroglossus bailloni Alchornea triplinervia</i>  | 52.79 | -0.675 | high | Plant-skewed | 1 |
| <i>Phyllomyias fasciatus Trema micrantha</i>         | 52.75 | -0.720 | high | Plant-skewed | 1 |
| <i>Turdus amaurochalinus Trema micrantha</i>         | 52.73 | -0.720 | high | Plant-skewed | 2 |
| <i>Pitangus sulphuratus Guapira opposita</i>         | 52.70 | -0.686 | high | Plant-skewed | 3 |
| <i>Coereba flaveola Varronia curassavica</i>         | 52.60 | -0.774 | high | Plant-skewed | 1 |
| <i>Manacus manacus Citharexylum myrianthum</i>       | 52.60 | -0.636 | high | Plant-skewed | 1 |
| <i>Turdus amaurochalinus Aegiphila integrifolia</i>  | 52.57 | -0.719 | high | Plant-skewed | 2 |
| <i>Icterus cayanensis Citharexylum myrianthum</i>    | 52.52 | -0.638 | high | Plant-skewed | 1 |
| <i>Mimus gilvus Erythroxylum ovalifolium</i>         | 52.50 | -0.382 | high | Plant-skewed | 1 |
| <i>Pitangus sulphuratus Alchornea triplinervia</i>   | 52.43 | -0.684 | high | Plant-skewed | 1 |

|                                                        |       |        |      |              |   |
|--------------------------------------------------------|-------|--------|------|--------------|---|
| <i>Myiozetetes similis Cordia ecalyculata</i>          | 52.41 | -0.797 | high | Plant-skewed | 1 |
| <i>Trogon rufus Miconia tristis</i>                    | 52.34 | 0.913  | high | Bird-skewed  | 1 |
| <i>Saltator maximus Varronia curassavica</i>           | 52.34 | -0.781 | high | Plant-skewed | 1 |
| <i>Ramphastos vitellinus Annona neosericea</i>         | 52.32 | -0.769 | high | Plant-skewed | 1 |
| <i>Megarynchus pitangua Rubus urticifolius</i>         | 52.31 | -0.766 | high | Plant-skewed | 1 |
| <i>Pipile jacutinga Xylopia brasiliensis</i>           | 52.30 | 0.196  | high | Bird-skewed  | 1 |
| <i>Trogon rufus Miconia pusilliflora</i>               | 52.29 | 0.914  | high | Bird-skewed  | 1 |
| <i>Trichothraupis melanops Urera baccifera</i>         | 52.28 | -0.840 | high | Plant-skewed | 2 |
| <i>Myiodynastes maculatus Trema micrantha</i>          | 52.21 | -0.733 | high | Plant-skewed | 2 |
| <i>Oxyruncus cristatus Ocotea bicolor</i>              | 52.14 | 0.517  | high | Bird-skewed  | 1 |
| <i>Camptostoma obsoletum Erythroxylum<br/>deciduum</i> | 52.08 | -0.415 | high | Plant-skewed | 1 |
| <i>Stephanophorus diadematus Rubus urticifolius</i>    | 52.08 | -0.771 | high | Plant-skewed | 1 |
| <i>Tangara preciosa Styraax leprosus</i>               | 52.07 | -0.894 | high | Plant-skewed | 1 |
| <i>Myiodynastes maculatus Aegiphila integrifolia</i>   | 52.05 | -0.732 | high | Plant-skewed | 1 |
| <i>Pteroglossus bailloni Alchornea glandulosa</i>      | 52.03 | -0.668 | high | Plant-skewed | 1 |
| <i>Mionectes rufiventris Alchornea triplinervia</i>    | 51.94 | -0.696 | high | Plant-skewed | 1 |
| <i>Trogon rufus Ossaea amygdaloides</i>                | 51.90 | 0.922  | high | Bird-skewed  | 1 |
| <i>Myiozetetes similis Varronia curassavica</i>        | 51.76 | -0.794 | high | Plant-skewed | 1 |
| <i>Euphonia violacea Guapira opposita</i>              | 51.70 | -0.711 | high | Plant-skewed | 1 |
| <i>Trogon viridis Persea willdenovii</i>               | 51.67 | 0.291  | high | Bird-skewed  | 1 |
| <i>Nemosia pileata Citharexylum myrianthum</i>         | 51.64 | -0.661 | high | Plant-skewed | 1 |
| <i>Cacicus haemorrhous Varronia curassavica</i>        | 51.64 | -0.797 | high | Plant-skewed | 1 |
| <i>Pipile jacutinga Cupania vernalis</i>               | 51.64 | 0.218  | high | Bird-skewed  | 1 |
| <i>Turdus amaurochalinus Guapira opposita</i>          | 51.63 | -0.713 | high | Plant-skewed | 3 |
| <i>Procnias nudicollis Cupania oblongifolia</i>        | 51.59 | -0.457 | high | Plant-skewed | 1 |
| <i>Melanerpes flavifrons Virola bicuhyba</i>           | 51.59 | -0.577 | high | Plant-skewed | 1 |
| <i>Antilophia galeata Rubus rosifolius</i>             | 51.58 | -0.783 | high | Plant-skewed | 1 |
| <i>Fluvicola nengeta Citharexylum myrianthum</i>       | 51.55 | -0.663 | high | Plant-skewed | 1 |
| <i>Pteroglossus bailloni Maytenus gonoclada</i>        | 51.54 | -0.664 | high | Plant-skewed | 1 |
| <i>Arremon taciturnus Trema micrantha</i>              | 51.52 | -0.749 | high | Plant-skewed | 1 |

|                                                           |       |        |      |              |   |
|-----------------------------------------------------------|-------|--------|------|--------------|---|
| <i>Orthogonys chloricterus Pourouma guianensis</i>        | 51.49 | -0.795 | high | Plant-skewed | 1 |
| <i>Turdus amaurochalinus Alchornea triplinervia</i>       | 51.35 | -0.711 | high | Plant-skewed | 1 |
| <i>Turdus subalaris Virola bicuhyba</i>                   | 51.25 | -0.587 | high | Plant-skewed | 1 |
| <i>Penelope superciliaris Maytenus gonoclada</i>          | 51.24 | -0.672 | high | Plant-skewed | 1 |
| <i>Penelope sp Rubus urticifolius</i>                     | 51.23 | -0.791 | high | Plant-skewed | 1 |
| <i>Mionectes rufiventris Alchornea glandulosa</i>         | 51.18 | -0.690 | high | Plant-skewed | 1 |
| <i>Pitangus sulphuratus Citharexylum myrianthum</i>       | 51.17 | -0.673 | high | Plant-skewed | 3 |
| <i>Lipaugus lanioides Trema micrantha</i>                 | 51.15 | -0.759 | high | Plant-skewed | 1 |
| <i>Ramphastos vitellinus Neomitranthes glomerata</i>      | 51.14 | -0.762 | high | Plant-skewed | 1 |
| <i>Megarynchus pitangua Trema micrantha</i>               | 51.13 | -0.759 | high | Plant-skewed | 1 |
| <i>Pitangus sulphuratus Tabernaemontana catharinensis</i> | 51.11 | -0.673 | high | Plant-skewed | 1 |
| <i>Cacicus haemorrhous Rubus rosifolius</i>               | 51.10 | -0.794 | high | Plant-skewed | 1 |
| <i>Cnemotriccus fuscatus Trema micrantha</i>              | 51.05 | -0.761 | high | Plant-skewed | 1 |
| <i>Cissopis leverianus Rubus sp</i>                       | 51.05 | -0.843 | high | Plant-skewed | 1 |
| <i>Turdus rufiventris Rubus brasiliensis</i>              | 51.03 | -0.861 | high | Plant-skewed | 1 |
| <i>Turdus albicollis Cordia silvestris</i>                | 51.01 | -0.825 | high | Plant-skewed | 1 |
| <i>Crotophaga major Clusia hilariana</i>                  | 51.01 | 0.591  | high | Bird-skewed  | 1 |
| <i>Megarynchus pitangua Aegiphila integrifolia</i>        | 50.98 | -0.758 | high | Plant-skewed | 2 |
| <i>Pipile jacutinga Persea alba</i>                       | 50.90 | 0.244  | high | Bird-skewed  | 1 |
| <i>Elaenia sp Varronia curassavica</i>                    | 50.89 | -0.814 | high | Plant-skewed | 1 |
| <i>Cnemotriccus fuscatus Aegiphila integrifolia</i>       | 50.89 | -0.760 | high | Plant-skewed | 1 |
| <i>Ramphastos dicolorus Aegiphila integrifolia</i>        | 50.89 | -0.760 | high | Plant-skewed | 1 |
| <i>Coereba flaveola Trema micrantha</i>                   | 50.88 | -0.765 | high | Plant-skewed | 1 |
| <i>Trogon viridis Ficus sp</i>                            | 50.87 | 0.317  | high | Bird-skewed  | 1 |
| <i>Turdus albicollis Schefflera angustissima</i>          | 50.85 | -0.825 | high | Plant-skewed | 2 |
| <i>Pyroderus scutatus Cabralea canjerana</i>              | 50.84 | -0.338 | high | Plant-skewed | 1 |
| <i>Pipraeidea melanonota Alchornea triplinervia</i>       | 50.84 | -0.724 | high | Plant-skewed | 1 |
| <i>Myiodynastes maculatus Alchornea triplinervia</i>      | 50.84 | -0.724 | high | Plant-skewed | 2 |

|                                                               |       |        |      |              |   |
|---------------------------------------------------------------|-------|--------|------|--------------|---|
| <i>Selenidera maculirostris Geonoma gamiova</i>               | 50.79 | -0.134 | high | Plant-skewed | 1 |
| <i>Sporophila leucoptera Varronia curassavica</i>             | 50.74 | -0.818 | high | Plant-skewed | 1 |
| <i>Coereba flaveola Aegiphila integrifolia</i>                | 50.72 | -0.764 | high | Plant-skewed | 2 |
| <i>Tachyphonus coronatus Urera baccifera</i>                  | 50.64 | -0.877 | high | Plant-skewed | 2 |
| <i>Saltator maximus Trema micrantha</i>                       | 50.62 | -0.771 | high | Plant-skewed | 1 |
| <i>Pipile jacutinga Chomelia parvifolia</i>                   | 50.60 | 0.254  | high | Bird-skewed  | 1 |
| <i>Elaenia flavogaster Varronia curassavica</i>               | 50.49 | -0.823 | high | Plant-skewed | 1 |
| <i>Elaenia sp Annona neosericea</i>                           | 50.46 | -0.812 | high | Plant-skewed | 1 |
| <i>Saltator maximus Aegiphila integrifolia</i>                | 50.46 | -0.770 | high | Plant-skewed | 1 |
| <i>Parula pitayumi Citharexylum myrianthum</i>                | 50.39 | -0.693 | high | Plant-skewed | 1 |
| <i>Trogon rufus Myrcia brasiliensis</i>                       | 50.35 | 0.955  | high | Bird-skewed  | 1 |
| <i>Selenidera maculirostris Symplocos glandulosomarginata</i> | 50.34 | -0.119 | high | Plant-skewed | 1 |
| <i>Selenidera maculirostris Geonoma elegans</i>               | 50.33 | -0.119 | high | Plant-skewed | 1 |
| <i>Turdus flavipes Myriopus paniculatus</i>                   | 50.28 | -0.826 | high | Plant-skewed | 1 |
| <i>Trogon viridis Ficus glabra</i>                            | 50.26 | 0.337  | high | Bird-skewed  | 1 |
| <i>Tersina viridis Trema micrantha</i>                        | 50.23 | -0.781 | high | Plant-skewed | 1 |
| <i>Thlypopsis sordida Zanthoxylum fagara</i>                  | 50.23 | -0.792 | high | Plant-skewed | 1 |
| <i>Pipile jacutinga Myrsine coriacea</i>                      | 50.20 | 0.268  | high | Bird-skewed  | 1 |
| <i>Pitangus sulphuratus Alchornea sidifolia</i>               | 50.20 | -0.665 | high | Plant-skewed | 1 |
| <i>Tachyphonus cristatus Aegiphila integrifolia</i>           | 50.18 | -0.777 | high | Plant-skewed | 1 |
| <i>Euphonia violacea Citharexylum myrianthum</i>              | 50.17 | -0.699 | high | Plant-skewed | 1 |
| <i>Cyanerpes cyaneus Guapira opposita</i>                     | 50.14 | -0.750 | high | Plant-skewed | 1 |
| <i>Turdus amaurochalinus Citharexylum myrianthum</i>          | 50.09 | -0.701 | high | Plant-skewed | 2 |
| <i>Pipraeidea melanonota Alchornea glandulosa</i>             | 50.09 | -0.718 | high | Plant-skewed | 1 |
| <i>Myiodynastes maculatus Alchornea glandulosa</i>            | 50.08 | -0.718 | high | Plant-skewed | 1 |
| <i>Myiozetetes similis Trema micrantha</i>                    | 50.05 | -0.785 | high | Plant-skewed | 3 |
| <i>Dacnis cayana Varronia curassavica</i>                     | 50.04 | -0.834 | high | Plant-skewed | 1 |
| <i>Selenidera maculirostris Diploon sp</i>                    | 49.97 | -0.107 | high | Plant-skewed | 1 |
| <i>Oxyruncus cristatus Clusia criuva</i>                      | 49.96 | 0.579  | high | Bird-skewed  | 1 |

|                                                       |       |        |      |              |   |
|-------------------------------------------------------|-------|--------|------|--------------|---|
| <i>Vireo olivaceus Xylopia sericea</i>                | 49.96 | 0.141  | high | Bird-skewed  | 1 |
| <i>Elaenia flavogaster Rubus urticifolius</i>         | 49.95 | -0.821 | high | Plant-skewed | 1 |
| <i>Manacus manacus Maytenus aquifolia</i>             | 49.94 | -0.609 | high | Plant-skewed | 1 |
| <i>Conirostrum speciosum Citharexylum myrianthum</i>  | 49.90 | -0.706 | high | Plant-skewed | 1 |
| <i>Myiozetetes similis Aegiphila integrifolia</i>     | 49.89 | -0.784 | high | Plant-skewed | 2 |
| <i>Saltator similis Rubus sp</i>                      | 49.88 | -0.870 | high | Plant-skewed | 1 |
| <i>Thraupis sayaca Styraax leprosus</i>               | 49.87 | -0.941 | high | Plant-skewed | 1 |
| <i>Cyanerpes cyaneus Alchornea triplinervia</i>       | 49.87 | -0.748 | high | Plant-skewed | 1 |
| <i>Turdus albicollis Myrcia sp</i>                    | 49.85 | -0.821 | high | Plant-skewed | 1 |
| <i>Ramphocelus carbo Urera baccifera</i>              | 49.84 | -0.894 | high | Plant-skewed | 1 |
| <i>Thlypopsis sordida Trema micrantha</i>             | 49.83 | -0.790 | high | Plant-skewed | 1 |
| <i>Turdus rufiventris Cordia ecalyculata</i>          | 49.80 | -0.857 | high | Plant-skewed | 1 |
| <i>Coereba flaveola Guapira opposita</i>              | 49.78 | -0.759 | high | Plant-skewed | 1 |
| <i>Cacicus haemorrhous Aegiphila integrifolia</i>     | 49.77 | -0.787 | high | Plant-skewed | 1 |
| <i>Myiarchus tyrannulus Varronia curassavica</i>      | 49.75 | -0.841 | high | Plant-skewed | 1 |
| <i>Tachyphonus coronatus Rubus sp</i>                 | 49.68 | -0.874 | high | Plant-skewed | 1 |
| <i>Lathrotriccus euleri Alchornea triplinervia</i>    | 49.68 | -0.753 | high | Plant-skewed | 1 |
| <i>Myiodynastes maculatus Citharexylum myrianthum</i> | 49.58 | -0.715 | high | Plant-skewed | 3 |
| <i>Trichothraupis melanops Rubus rosifolius</i>       | 49.57 | -0.830 | high | Plant-skewed | 1 |
| <i>Trichothraupis melanops Rubus urticifolius</i>     | 49.57 | -0.830 | high | Plant-skewed | 1 |
| <i>Vireo olivaceus Cupania vernalis</i>               | 49.52 | 0.157  | high | Bird-skewed  | 2 |
| <i>Saltator maximus Guapira opposita</i>              | 49.52 | -0.765 | high | Plant-skewed | 1 |
| <i>Legatus leucophaeus Cupania oblongifolia</i>       | 49.50 | -0.520 | high | Plant-skewed | 1 |
| <i>Tangara mexicana Varronia curassavica</i>          | 49.49 | -0.847 | high | Plant-skewed | 1 |
| <i>Gnorimopsar chopi Trema micrantha</i>              | 49.46 | -0.800 | high | Plant-skewed | 1 |
| <i>Vireo olivaceus Zanthoxylum riedelianum</i>        | 49.45 | 0.159  | high | Bird-skewed  | 1 |
| <i>Tityra inquisitor Cabralea canjerana</i>           | 49.35 | -0.386 | high | Plant-skewed | 1 |
| <i>Tityra cayana Cabralea canjerana</i>               | 49.35 | -0.386 | high | Plant-skewed | 1 |
| <i>Tachyphonus coronatus Galium hypocarpium</i>       | 49.25 | -0.873 | high | Plant-skewed | 1 |

|                                                            |       |        |      |              |   |
|------------------------------------------------------------|-------|--------|------|--------------|---|
| <i>Pteroglossus bailloni</i> <i>Virola bicuhyba</i>        | 49.21 | -0.643 | high | Plant-skewed | 1 |
| <i>Elaenia sp</i> <i>Trema micrantha</i>                   | 49.18 | -0.806 | high | Plant-skewed | 1 |
| <i>Chiroxiphia caudate</i> <i>Schefflera angustissima</i>  | 49.12 | -0.865 | high | Plant-skewed | 1 |
| <i>Pipile jacutinga</i> <i>Nectandra megapotamica</i>      | 49.08 | 0.307  | high | Bird-skewed  | 1 |
| <i>Turdus rufiventris</i> <i>Myriopus paniculatus</i>      | 49.06 | -0.854 | high | Plant-skewed | 1 |
| <i>Celeus flavescens</i> <i>Maytenus aquifolia</i>         | 49.04 | -0.635 | high | Plant-skewed | 1 |
| <i>Lipaugus lanioides</i> <i>Alchornea glandulosa</i>      | 49.02 | -0.745 | high | Plant-skewed | 1 |
| <i>Megarynchus pitangua</i> <i>Alchornea glandulosa</i>    | 49.01 | -0.746 | high | Plant-skewed | 1 |
| <i>Penelope obscura</i> <i>Cordia myrciifolia</i>          | 48.96 | -0.668 | high | Plant-skewed | 1 |
| <i>Pipra rubrocapilla</i> <i>Aegiphila integrifolia</i>    | 48.89 | -0.809 | high | Plant-skewed | 1 |
| <i>Selenidera maculirostris</i> <i>Protium widgrenii</i>   | 48.88 | -0.069 | high | Plant-skewed | 1 |
| <i>Pachyramphus validus</i> <i>Cupania oblongifolia</i>    | 48.87 | -0.539 | high | Plant-skewed | 1 |
| <i>Pitangus sulphuratus</i> <i>Chiococca alba</i>          | 48.84 | -0.652 | high | Plant-skewed | 1 |
| <i>Cacicus haemorrhous</i> <i>Guapira opposita</i>         | 48.83 | -0.782 | high | Plant-skewed | 1 |
| <i>Turdus leucomelas</i> <i>Cordia ecalyculata</i>         | 48.79 | -0.880 | high | Plant-skewed | 1 |
| <i>Elaenia flavogaster</i> <i>Trema micrantha</i>          | 48.78 | -0.816 | high | Plant-skewed | 4 |
| <i>Procnias nudicollis</i> <i>Cabrlea canjerana</i>        | 48.73 | -0.407 | high | Plant-skewed | 1 |
| <i>Dacnis cayana</i> <i>Zanthoxylum fagara</i>             | 48.72 | -0.829 | high | Plant-skewed | 1 |
| <i>Ramphastos toco</i> <i>Copaifera langsdorffii</i>       | 48.70 | -0.474 | high | Plant-skewed | 1 |
| <i>Chiroxiphia caudate</i> <i>Myriopus paniculatus</i>     | 48.68 | -0.863 | high | Plant-skewed | 1 |
| <i>Turdus albicollis</i> <i>Aegiphila integrifolia</i>     | 48.63 | -0.815 | high | Plant-skewed | 1 |
| <i>Elaenia flavogaster</i> <i>Aegiphila integrifolia</i>   | 48.62 | -0.815 | high | Plant-skewed | 1 |
| <i>Turdus rufiventris</i> <i>Rubus urticifolius</i>        | 48.61 | -0.853 | high | Plant-skewed | 2 |
| <i>Turdus rufiventris</i> <i>Rubus rosifolius</i>          | 48.61 | -0.853 | high | Plant-skewed | 1 |
| <i>Penelope superciliaris</i> <i>Ilex theezans</i>         | 48.61 | -0.648 | high | Plant-skewed | 1 |
| <i>Cacicus haemorrhous</i> <i>Alchornea triplinervia</i>   | 48.55 | -0.781 | high | Plant-skewed | 1 |
| <i>Pipile jacutinga</i> <i>Matayba elaeagnoides</i>        | 48.55 | 0.325  | high | Bird-skewed  | 1 |
| <i>Megarynchus pitangua</i> <i>Citharexylum myrianthum</i> | 48.50 | -0.742 | high | Plant-skewed | 3 |
| <i>Tangara cyanocephala</i> <i>Urera sp</i>                | 48.45 | -0.925 | high | Plant-skewed | 1 |
| <i>Knipolegus nigerrimus</i> <i>Alchornea triplinervia</i> | 48.45 | -0.784 | high | Plant-skewed | 1 |

|                                                         |       |        |      |              |   |
|---------------------------------------------------------|-------|--------|------|--------------|---|
| <i>Selenidera maculirostris Cecropia pachystachya</i>   | 48.44 | -0.052 | high | Plant-skewed | 1 |
| <i>Hemithraupis ruficapilla Myriopus paniculatus</i>    | 48.44 | -0.869 | high | Plant-skewed | 1 |
| <i>Ramphastos dicolorus Maytenus gonoclada</i>          | 48.43 | -0.745 | high | Plant-skewed | 1 |
| <i>Ramphastos dicolorus Citharexylum myrianthum</i>     | 48.42 | -0.745 | high | Plant-skewed | 1 |
| <i>Ramphastos vitellinus Citharexylum myrianthum</i>    | 48.40 | -0.745 | high | Plant-skewed | 1 |
| <i>Trichothraupis melanops Trema micrantha</i>          | 48.39 | -0.825 | high | Plant-skewed | 2 |
| <i>Empidonomus varius Alchornea triplinervia</i>        | 48.38 | -0.785 | high | Plant-skewed | 1 |
| <i>Lipaugus lanioides Maytenus sp</i>                   | 48.38 | -0.741 | high | Plant-skewed | 1 |
| <i>Penelope obscura Coussarea contracta</i>             | 48.34 | -0.662 | high | Plant-skewed | 1 |
| <i>Dacnis cayana Trema micrantha</i>                    | 48.32 | -0.827 | high | Plant-skewed | 6 |
| <i>Pachyramphus validus Erythroxylum deciduum</i>       | 48.28 | -0.530 | high | Plant-skewed | 1 |
| <i>Coereba flaveola Citharexylum myrianthum</i>         | 48.25 | -0.749 | high | Plant-skewed | 1 |
| <i>Chiroxiphia caudate Rubus rosifolius</i>             | 48.23 | -0.862 | high | Plant-skewed | 1 |
| <i>Pachyramphus polychopterus Erythroxylum deciduum</i> | 48.22 | -0.532 | high | Plant-skewed | 1 |
| <i>Melanerpes candidus Erythroxylum deciduum</i>        | 48.18 | -0.533 | high | Plant-skewed | 1 |
| <i>Dacnis cayana Aegiphila integrifolia</i>             | 48.16 | -0.827 | high | Plant-skewed | 3 |
| <i>Vireo olivaceus Myrsine coriacea</i>                 | 48.08 | 0.210  | high | Bird-skewed  | 4 |
| <i>Myiarchus tyrannulus Trema micrantha</i>             | 48.03 | -0.834 | high | Plant-skewed | 1 |
| <i>Procnias nudicollis Symplocos uniflora</i>           | 48.02 | -0.393 | high | Plant-skewed | 1 |
| <i>Selenidera maculirostris Cecropia glaziovii</i>      | 48.01 | -0.035 | high | Plant-skewed | 1 |
| <i>Saltator maximus Citharexylum myrianthum</i>         | 47.99 | -0.756 | high | Plant-skewed | 1 |
| <i>Zonotrichia capensis Erythroxylum deciduum</i>       | 47.97 | -0.540 | high | Plant-skewed | 1 |
| <i>Carpornis melanocephala Cabralea canjerana</i>       | 47.96 | -0.432 | high | Plant-skewed | 1 |
| <i>Carpornis cucullata Cabralea canjerana</i>           | 47.96 | -0.432 | high | Plant-skewed | 1 |
| <i>Myiodynastes maculatus Syagrus romanzoffiana</i>     | 47.96 | -0.702 | high | Plant-skewed | 1 |
| <i>Pipra rubrocapilla Guapira opposita</i>              | 47.95 | -0.804 | high | Plant-skewed | 1 |
| <i>Cissopis leverianus Piper dilatatum</i>              | 47.94 | -0.831 | high | Plant-skewed | 1 |

|                                                        |       |        |      |              |   |
|--------------------------------------------------------|-------|--------|------|--------------|---|
| <i>Cissopis leverianus Piper aduncum</i>               | 47.94 | -0.831 | high | Plant-skewed | 1 |
| <i>Tachyphonus rufus Rubus rosifolius</i>              | 47.93 | -0.869 | high | Plant-skewed | 1 |
| <i>Tachyphonus coronatus Rubus rosifolius</i>          | 47.93 | -0.869 | high | Plant-skewed | 2 |
| <i>Tachyphonus coronatus Rubus urticifolius</i>        | 47.93 | -0.869 | high | Plant-skewed | 2 |
| <i>Orthogonys chloricterus Alchornea glandulosa</i>    | 47.85 | -0.776 | high | Plant-skewed | 1 |
| <i>Cacicus haemorrhous Alchornea glandulosa</i>        | 47.80 | -0.777 | high | Plant-skewed | 1 |
| <i>Cacicus chrysopterus Alchornea glandulosa</i>       | 47.80 | -0.777 | high | Plant-skewed | 1 |
| <i>Antilophia galeata Citharexylum myrianthum</i>      | 47.77 | -0.761 | high | Plant-skewed | 1 |
| <i>Trogon surrucura Cabralea canjerana</i>             | 47.72 | -0.440 | high | Plant-skewed | 1 |
| <i>Turdus albicollis Guapira opposita</i>              | 47.69 | -0.811 | high | Plant-skewed | 3 |
| <i>Ramphocelus bresilius Varronia curassavica</i>      | 47.68 | -0.889 | high | Plant-skewed | 1 |
| <i>Elaenia flavogaster Guapira opposita</i>            | 47.68 | -0.811 | high | Plant-skewed | 1 |
| <i>Troglodytes aedon Miconia tristis</i>               | 47.67 | 0.904  | high | Bird-skewed  | 1 |
| <i>Tangara mexicana Aegiphila integrifolia</i>         | 47.61 | -0.840 | high | Plant-skewed | 1 |
| <i>Turdus leucomelas Rubus urticifolius</i>            | 47.60 | -0.877 | high | Plant-skewed | 1 |
| <i>Turdus leucomelas Rubus rosifolius</i>              | 47.60 | -0.877 | high | Plant-skewed | 1 |
| <i>Turdus flavipes Guapira opposita</i>                | 47.56 | -0.814 | high | Plant-skewed | 2 |
| <i>Thraupis cyanoptera Schefflera angustissima</i>     | 47.53 | -0.901 | high | Plant-skewed | 1 |
| <i>Pipile jacutinga Ficus enormis</i>                  | 47.48 | 0.362  | high | Bird-skewed  | 1 |
| <i>Turdus amaurochalinus Ilex theezans</i>             | 47.47 | -0.679 | high | Plant-skewed | 1 |
| <i>Turdus rufiventris Trema micrantha</i>              | 47.43 | -0.849 | high | Plant-skewed | 1 |
| <i>Turdus albicollis Alchornea triplinervia</i>        | 47.41 | -0.810 | high | Plant-skewed | 3 |
| <i>Myiozetetes similis Citharexylum myrianthum</i>     | 47.41 | -0.771 | high | Plant-skewed | 2 |
| <i>Tangara cayana Rubus rosifolius</i>                 | 47.40 | -0.881 | high | Plant-skewed | 1 |
| <i>Oxyruncus cristatus Nectandra membranacea</i>       | 47.38 | 0.652  | high | Bird-skewed  | 1 |
| <i>Orthogonys chloricterus Citharexylum myrianthum</i> | 47.34 | -0.773 | high | Plant-skewed | 1 |
| <i>Turdus flavipes Alchornea triplinervia</i>          | 47.29 | -0.813 | high | Plant-skewed | 2 |
| <i>Coereba flaveola Alchornea sidifolia</i>            | 47.28 | -0.742 | high | Plant-skewed | 1 |
| <i>Turdus rufiventris Aegiphila integrifolia</i>       | 47.28 | -0.848 | high | Plant-skewed | 3 |
| <i>Dacnis cayana Guapira opposita</i>                  | 47.22 | -0.822 | high | Plant-skewed | 1 |



|                                                         |       |        |      |              |   |
|---------------------------------------------------------|-------|--------|------|--------------|---|
| <i>Celeus flavescens Marcgravia polyantha</i>           | 47.16 | -0.614 | high | Plant-skewed | 1 |
| <i>Oxyruncus cristatus Struthanthus martianus</i>       | 47.15 | 0.659  | high | Bird-skewed  | 1 |
| <i>Ramphocelus carbo Rubus rosifolius</i>               | 47.14 | -0.888 | high | Plant-skewed | 1 |
| <i>Ramphastos vitellinus Virola gardneri</i>            | 47.09 | -0.736 | high | Plant-skewed | 1 |
| <i>Thraupis cyanoptera Myriopus paniculatus</i>         | 47.08 | -0.900 | high | Plant-skewed | 1 |
| <i>Chiroxiphia caudata Trema micrantha</i>              | 47.06 | -0.858 | high | Plant-skewed | 2 |
| <i>Pyroderus scutatus Symplocos glandulosomarginata</i> | 47.03 | -0.243 | high | Plant-skewed | 1 |
| <i>Trichothraupis melanops Alchornea triplinervia</i>   | 47.02 | -0.819 | high | Plant-skewed | 1 |
| <i>Pipile jacutinga Myrsine venosa</i>                  | 46.98 | 0.379  | high | Bird-skewed  | 1 |
| <i>Myiarchus swainsoni Trema micrantha</i>              | 46.97 | -0.860 | high | Plant-skewed | 1 |
| <i>Saltator similis Trema micrantha</i>                 | 46.95 | -0.860 | high | Plant-skewed | 2 |
| <i>Dacnis cayana Alchornea triplinervia</i>             | 46.95 | -0.821 | high | Plant-skewed | 2 |
| <i>Sporophila caerulescens Varronia curassavica</i>     | 46.95 | -0.906 | high | Plant-skewed | 1 |
| <i>Chiroxiphia caudate Aegiphila integrifolia</i>       | 46.90 | -0.857 | high | Plant-skewed | 1 |
| <i>Chiroxiphia caudate Piper dilatatum</i>              | 46.88 | -0.857 | high | Plant-skewed | 1 |
| <i>Pipile jacutinga Myrsine umbellata</i>               | 46.83 | 0.384  | high | Bird-skewed  | 1 |
| <i>Hemithraupis ruficapilla Trema micrantha</i>         | 46.81 | -0.864 | high | Plant-skewed | 1 |
| <i>Saltator similis Aegiphila integrifolia</i>          | 46.79 | -0.860 | high | Plant-skewed | 1 |
| <i>Orthogonys chloricterus Myrtaceae sp</i>             | 46.77 | -0.769 | high | Plant-skewed | 1 |
| <i>Tachyphonus coronatus Trema micrantha</i>            | 46.75 | -0.865 | high | Plant-skewed | 3 |
| <i>Tangara mexicana Guapira opposita</i>                | 46.67 | -0.836 | high | Plant-skewed | 1 |
| <i>Turdus albicollis Alchornea glandulosa</i>           | 46.66 | -0.806 | high | Plant-skewed | 1 |
| <i>Thraupis sayaca Cordia sellowiana</i>                | 46.64 | -0.937 | high | Plant-skewed | 1 |
| <i>Thraupis cyanoptera Rubus urticifolius</i>           | 46.64 | -0.899 | high | Plant-skewed | 1 |
| <i>Legatus leucophaeus Cabralea canjerana</i>           | 46.64 | -0.475 | high | Plant-skewed | 1 |
| <i>Vireo olivaceus Myrsine lancifolia</i>               | 46.64 | 0.264  | high | Bird-skewed  | 1 |
| <i>Tangara cayana Zanthoxylum fagara</i>                | 46.62 | -0.879 | high | Plant-skewed | 1 |
| <i>Tachyphonus coronatus Aegiphila integrifolia</i>     | 46.60 | -0.865 | high | Plant-skewed | 2 |
| <i>Tachyphonus coronatus Piper dilatatum</i>            | 46.58 | -0.865 | high | Plant-skewed | 1 |
| <i>Tachyphonus coronatus Piper aduncum</i>              | 46.58 | -0.865 | high | Plant-skewed | 1 |

|                                                        |       |        |      |              |   |
|--------------------------------------------------------|-------|--------|------|--------------|---|
| <i>Pyroderus scutatus Chrysophyllum viride</i>         | 46.57 | -0.230 | high | Plant-skewed | 1 |
| <i>Elaenia sp Citharexylum myrianthum</i>              | 46.54 | -0.793 | high | Plant-skewed | 1 |
| <i>Turdus flavipes Alchornea glandulosa</i>            | 46.53 | -0.809 | high | Plant-skewed | 1 |
| <i>Nemosia pileata Cupania oblongifolia</i>            | 46.52 | -0.609 | high | Plant-skewed | 1 |
| <i>Pipile jacutinga Ocotea catharinensis</i>           | 46.47 | 0.397  | high | Bird-skewed  | 1 |
| <i>Pitangus sulphuratus Cupania emarginata</i>         | 46.46 | -0.628 | high | Plant-skewed | 1 |
| <i>Myiarchus ferox Trema micrantha</i>                 | 46.43 | -0.873 | high | Plant-skewed | 1 |
| <i>Turdus leucomelas Trema micrantha</i>               | 46.42 | -0.873 | high | Plant-skewed | 1 |
| <i>Pteroglossus bailloni Cupania oblongifolia</i>      | 46.40 | -0.613 | high | Plant-skewed | 1 |
| <i>Turdus rufiventris Guapira opposita</i>             | 46.33 | -0.845 | high | Plant-skewed | 1 |
| <i>Coryphospingus cucullatus Guapira opposita</i>      | 46.29 | -0.846 | high | Plant-skewed | 1 |
| <i>Myiarchus ferox Aegiphila integrifolia</i>          | 46.28 | -0.873 | high | Plant-skewed | 2 |
| <i>Turdus leucomelas Aegiphila integrifolia</i>        | 46.27 | -0.873 | high | Plant-skewed | 2 |
| <i>Thlypopsis sordida Alchornea sidifolia</i>          | 46.23 | -0.770 | high | Plant-skewed | 1 |
| <i>Tangara cayana Trema micrantha</i>                  | 46.22 | -0.878 | high | Plant-skewed | 2 |
| <i>Lipaugus lanioides Virola bicuhyba</i>              | 46.20 | -0.726 | high | Plant-skewed | 1 |
| <i>Dacnis cayana Alchornea glandulosa</i>              | 46.20 | -0.818 | high | Plant-skewed | 1 |
| <i>Turdus albicollis Maytenus gonoclada</i>            | 46.17 | -0.803 | high | Plant-skewed | 3 |
| <i>Selenidera maculirostris Zanthoxylum rhoifolium</i> | 46.16 | 0.042  | high | Bird-skewed  | 1 |
| <i>Turdus albicollis Citharexylum myrianthum</i>       | 46.15 | -0.803 | high | Plant-skewed | 1 |
| <i>Elaenia flavogaster Citharexylum myrianthum</i>     | 46.14 | -0.804 | high | Plant-skewed | 3 |
| <i>Thraupis palmarum Varronia curassavica</i>          | 46.14 | -0.925 | high | Plant-skewed | 1 |
| <i>Ramphastos sp Virola bicuhyba</i>                   | 46.13 | -0.728 | high | Plant-skewed | 1 |
| <i>Ramphastos dicolorus Virola bicuhyba</i>            | 46.10 | -0.728 | high | Plant-skewed | 2 |
| <i>Ramphastos vitellinus Virola bicuhyba</i>           | 46.09 | -0.729 | high | Plant-skewed | 3 |
| <i>Tangara cayana Aegiphila integrifolia</i>           | 46.07 | -0.878 | high | Plant-skewed | 1 |
| <i>Turdus rufiventris Alchornea triplinervia</i>       | 46.06 | -0.843 | high | Plant-skewed | 2 |
| <i>Tyrannus savana Trema micrantha</i>                 | 46.04 | -0.882 | high | Plant-skewed | 1 |
| <i>Tyrannus melancholicus Trema micrantha</i>          | 46.04 | -0.882 | high | Plant-skewed | 4 |
| <i>Pitangus sulphuratus Cupania oblongifolia</i>       | 46.04 | -0.623 | high | Plant-skewed | 2 |

|                                                             |       |        |      |              |   |
|-------------------------------------------------------------|-------|--------|------|--------------|---|
| <i>Turdus albicollis</i> <i>Maytenus</i> sp                 | 46.02 | -0.803 | high | Plant-skewed | 1 |
| <i>Pachyramphus validus</i> <i>Cabralea canjerana</i>       | 46.01 | -0.495 | high | Plant-skewed | 2 |
| <i>Cissopis leverianus</i> <i>Alchornea glandulosa</i>      | 45.99 | -0.823 | high | Plant-skewed | 1 |
| <i>Celeus flavescens</i> <i>Erythroxylum deciduum</i>       | 45.97 | -0.600 | high | Plant-skewed | 1 |
| <i>Pipile jacutinga</i> <i>Ocotea bicolor</i>               | 45.97 | 0.414  | high | Bird-skewed  | 1 |
| <i>Ramphocelus bresilius</i> <i>Trema micrantha</i>         | 45.96 | -0.884 | high | Plant-skewed | 1 |
| <i>Ramphocelus carbo</i> <i>Trema micrantha</i>             | 45.96 | -0.884 | high | Plant-skewed | 2 |
| <i>Chiroxiphia caudate</i> <i>Guapira opposita</i>          | 45.96 | -0.854 | high | Plant-skewed | 1 |
| <i>Melanerpes flavifrons</i> <i>Cabralea canjerana</i>      | 45.91 | -0.499 | high | Plant-skewed | 1 |
| <i>Tyrannus melancholicus</i> <i>Aegiphila integrifolia</i> | 45.89 | -0.882 | high | Plant-skewed | 1 |
| <i>Tangara preciosa</i> <i>Myrrhinium atropurpureum</i>     | 45.86 | -0.878 | high | Plant-skewed | 1 |
| <i>Vireo olivaceus</i> <i>Ilex brevicuspis</i>              | 45.83 | 0.294  | high | Bird-skewed  | 1 |
| <i>Ramphocelus bresilius</i> <i>Aegiphila integrifolia</i>  | 45.80 | -0.884 | high | Plant-skewed | 2 |
| <i>Tangara seledon</i> <i>Trema micrantha</i>               | 45.79 | -0.889 | high | Plant-skewed | 1 |
| <i>Elaenia mesoleuca</i> <i>Alchornea triplinervia</i>      | 45.79 | -0.850 | high | Plant-skewed | 1 |
| <i>Thraupis sayaca</i> <i>Varronia curassavica</i>          | 45.70 | -0.935 | high | Plant-skewed | 1 |
| <i>Dacnis cayana</i> <i>Citharexylum myrianthum</i>         | 45.69 | -0.815 | high | Plant-skewed | 1 |
| <i>Chiroxiphia caudate</i> <i>Alchornea triplinervia</i>    | 45.68 | -0.853 | high | Plant-skewed | 2 |
| <i>Vireo olivaceus</i> <i>Myrsine</i> sp                    | 45.61 | 0.302  | high | Bird-skewed  | 1 |
| <i>Myiarchus swainsoni</i> <i>Alchornea triplinervia</i>    | 45.60 | -0.855 | high | Plant-skewed | 1 |
| <i>Saltator similis</i> <i>Alchornea triplinervia</i>       | 45.58 | -0.856 | high | Plant-skewed | 2 |
| <i>Hemithraupis flavicollis</i> <i>Guapira opposita</i>     | 45.54 | -0.864 | high | Plant-skewed | 1 |
| <i>Thraupis cyanoptera</i> <i>Trema micrantha</i>           | 45.46 | -0.897 | high | Plant-skewed | 1 |
| <i>Pitangus sulphuratus</i> <i>Erythroxylum deciduum</i>    | 45.45 | -0.616 | high | Plant-skewed | 1 |
| <i>Tachyphonus coronatus</i> <i>Alchornea triplinervia</i>  | 45.38 | -0.861 | high | Plant-skewed | 2 |
| <i>Turdus rufiventris</i> <i>Alchornea glandulosa</i>       | 45.31 | -0.840 | high | Plant-skewed | 1 |
| <i>Tersina viridis</i> <i>Virola bicuhyba</i>               | 45.29 | -0.751 | high | Plant-skewed | 1 |
| <i>Sporophila caerulescens</i> <i>Trema micrantha</i>       | 45.23 | -0.902 | high | Plant-skewed | 1 |
| <i>Elaenia flavogaster</i> <i>Alchornea sidifolia</i>       | 45.17 | -0.799 | high | Plant-skewed | 1 |
| <i>Thraupis sayaca</i> <i>Rubus rosifolius</i>              | 45.16 | -0.934 | high | Plant-skewed | 1 |
| <i>Thraupis episcopus</i> <i>Rubus rosifolius</i>           | 45.15 | -0.935 | high | Plant-skewed | 1 |

|                                                      |       |        |      |              |   |
|------------------------------------------------------|-------|--------|------|--------------|---|
| <i>Mimus saturninus Opuntia monacantha</i>           | 45.15 | -0.201 | high | Plant-skewed | 1 |
| <i>Pitangus sulphuratus Erythroxylum ovalifolium</i> | 45.06 | -0.612 | high | Plant-skewed | 1 |
| <i>Thraupis sayaca Myrcia sp</i>                     | 45.05 | -0.934 | high | Plant-skewed | 1 |
| <i>Celeus flavescens Copaifera trapezifolia</i>      | 45.04 | -0.589 | high | Plant-skewed | 1 |
| <i>Selenidera maculirostris Persea willdenovii</i>   | 45.01 | 0.090  | high | Bird-skewed  | 1 |
| <i>Zonotrichia capensis Symplocos uniflora</i>       | 45.00 | -0.494 | high | Plant-skewed | 1 |
| <i>Turdus amaurochalinus Cupania oblongifolia</i>    | 44.97 | -0.655 | high | Plant-skewed | 2 |
| <i>Carpornis cucullata Symplocos tetrandra</i>       | 44.95 | -0.370 | high | Plant-skewed | 1 |
| <i>Tyrannus melancholicus Guapira opposita</i>       | 44.94 | -0.879 | high | Plant-skewed | 2 |
| <i>Chiroxiphia caudate Alchornea glandulosa</i>      | 44.93 | -0.850 | high | Plant-skewed | 1 |
| <i>Tangara preciosa Schaefferia argentinensis</i>    | 44.92 | -0.875 | high | Plant-skewed | 1 |
| <i>Turdus amaurochalinus Erythroxylum argentinum</i> | 44.88 | -0.654 | high | Plant-skewed | 1 |
| <i>Pteroglossus bailloni Copaifera trapezifolia</i>  | 44.87 | -0.594 | high | Plant-skewed | 1 |
| <i>Ramphocelus bresilius Guapira opposita</i>        | 44.86 | -0.881 | high | Plant-skewed | 1 |
| <i>Saltator similis Alchornea glandulosa</i>         | 44.83 | -0.853 | high | Plant-skewed | 1 |
| <i>Turdus rufiventris Citharexylum myrianthum</i>    | 44.80 | -0.838 | high | Plant-skewed | 2 |
| <i>Selenidera maculirostris Mollinedia uleana</i>    | 44.74 | 0.102  | high | Bird-skewed  | 1 |
| <i>Dacnis cayana Alchornea sidifolia</i>             | 44.72 | -0.811 | high | Plant-skewed | 1 |
| <i>Vireo olivaceus Myrsine umbellata</i>             | 44.71 | 0.336  | high | Bird-skewed  | 2 |
| <i>Hemithraupis ruficapilla Alchornea glandulosa</i> | 44.69 | -0.856 | high | Plant-skewed | 1 |
| <i>Tyrannus melancholicus Alchornea triplinervia</i> | 44.67 | -0.878 | high | Plant-skewed | 1 |
| <i>Pipile jacutinga Ocotea teleiandra</i>            | 44.64 | 0.460  | high | Bird-skewed  | 1 |
| <i>Tachyphonus coronatus Alchornea glandulosa</i>    | 44.63 | -0.858 | high | Plant-skewed | 1 |
| <i>Habia rubica Geonoma gamiova</i>                  | 44.62 | -0.360 | high | Plant-skewed | 1 |
| <i>Manacus manacus Cabralea canjerana</i>            | 44.61 | -0.541 | high | Plant-skewed | 1 |
| <i>Carpornis cucullata Geonoma gamiova</i>           | 44.59 | -0.361 | high | Plant-skewed | 1 |
| <i>Ramphocelus bresilius Alchornea triplinervia</i>  | 44.59 | -0.881 | high | Plant-skewed | 1 |
| <i>Tangara cyanocephala Trema micrantha</i>          | 44.57 | -0.918 | high | Plant-skewed | 1 |
| <i>Mimus saturninus Schinus terebinthifolia</i>      | 44.56 | -0.182 | high | Plant-skewed | 3 |
| <i>Picumnus nebulous Myrsine coriacea</i>            | 44.55 | 0.091  | high | Bird-skewed  | 1 |

|                                                          |       |        |      |              |   |
|----------------------------------------------------------|-------|--------|------|--------------|---|
| <i>Thraupis ornate Trema micrantha</i>                   | 44.46 | -0.921 | high | Plant-skewed | 1 |
| <i>Pipraeidea melanonota Cupania oblongifolia</i>        | 44.45 | -0.671 | high | Plant-skewed | 1 |
| <i>Myiodynastes maculatus Cupania oblongifolia</i>       | 44.45 | -0.671 | high | Plant-skewed | 2 |
| <i>Chiroxiphia caudate Maytenus gonoclada</i>            | 44.44 | -0.848 | high | Plant-skewed | 1 |
| <i>Chiroxiphia caudate Citharexylum myrianthum</i>       | 44.42 | -0.848 | high | Plant-skewed | 1 |
| <i>Thraupis palmarum Trema micrantha</i>                 | 44.42 | -0.922 | high | Plant-skewed | 2 |
| <i>Penelope obscura Inga marginata</i>                   | 44.42 | -0.621 | high | Plant-skewed | 1 |
| <i>Psarocolius decumanus Cupania oblongifolia</i>        | 44.40 | -0.672 | high | Plant-skewed | 1 |
| <i>Procnias nudicollis Protium heptaphyllum</i>          | 44.38 | -0.308 | high | Plant-skewed | 1 |
| <i>Turdus amaurochalinus Erythroxylum deciduum</i>       | 44.37 | -0.649 | high | Plant-skewed | 1 |
| <i>Thraupis cyanopectera Guapira opposita</i>            | 44.36 | -0.894 | high | Plant-skewed | 1 |
| <i>Saltator similis Citharexylum myrianthum</i>          | 44.32 | -0.851 | high | Plant-skewed | 1 |
| <i>Thraupis ornate Piper dilatatum</i>                   | 44.29 | -0.921 | high | Plant-skewed | 1 |
| <i>Thraupis palmarum Aegiphila integrifolia</i>          | 44.26 | -0.922 | high | Plant-skewed | 1 |
| <i>Volatinia jacarina Erythroxylum deciduum</i>          | 44.20 | -0.654 | high | Plant-skewed | 1 |
| <i>Carpornis cucullata Symplocos glandulosomarginata</i> | 44.15 | -0.351 | high | Plant-skewed | 1 |
| <i>Thraupis cyanopectera Alchornea triplinervia</i>      | 44.09 | -0.893 | high | Plant-skewed | 1 |
| <i>Mimus gilvus Ptilinopus arrabida</i>                  | 43.99 | -0.163 | high | Plant-skewed | 1 |
| <i>Thraupis sayaca Trema micrantha</i>                   | 43.98 | -0.932 | high | Plant-skewed | 2 |
| <i>Thraupis episcopus Trema micrantha</i>                | 43.97 | -0.933 | high | Plant-skewed | 2 |
| <i>Carpornis cucullata Geonoma pauciflora</i>            | 43.95 | -0.346 | high | Plant-skewed | 1 |
| <i>Tyrannus melancholicus Alchornea glandulosa</i>       | 43.92 | -0.876 | high | Plant-skewed | 1 |
| <i>Myiodynastes maculatus Erythroxylum deciduum</i>      | 43.86 | -0.665 | high | Plant-skewed | 1 |
| <i>Chiroxiphia caudate Myrtaceae sp</i>                  | 43.85 | -0.846 | high | Plant-skewed | 1 |
| <i>Turdus albicollis Virola bicuhyba</i>                 | 43.84 | -0.791 | high | Plant-skewed | 2 |
| <i>Turdus rufiventris Alchornea sidifolia</i>            | 43.83 | -0.834 | high | Plant-skewed | 1 |
| <i>Thraupis sayaca Aegiphila integrifolia</i>            | 43.82 | -0.932 | high | Plant-skewed | 2 |
| <i>Myiarchus ferox Citharexylum myrianthum</i>           | 43.80 | -0.864 | high | Plant-skewed | 3 |

|                                                         |       |        |      |              |   |
|---------------------------------------------------------|-------|--------|------|--------------|---|
| <i>Turdus leucomelas Citharexylum myrianthum</i>        | 43.79 | -0.865 | high | Plant-skewed | 4 |
| <i>Megarynchus pitangua Cupania emarginata</i>          | 43.79 | -0.707 | high | Plant-skewed | 1 |
| <i>Turdus flavipes Virola bicuhyba</i>                  | 43.71 | -0.794 | high | Plant-skewed | 3 |
| <i>Tangara desmaresti Trema micrantha</i>               | 43.67 | -0.940 | high | Plant-skewed | 1 |
| <i>Tangara seledon Alchornea glandulosa</i>             | 43.67 | -0.883 | high | Plant-skewed | 1 |
| <i>Tangara cayana Citharexylum myrianthum</i>           | 43.59 | -0.870 | high | Plant-skewed | 1 |
| <i>Euphonia chlorotica Cupania oblongifolia</i>         | 43.56 | -0.697 | high | Plant-skewed | 1 |
| <i>Pteroglossus bailloni Cabralea canjerana</i>         | 43.54 | -0.576 | high | Plant-skewed | 1 |
| <i>Turdus albicollis Ilex theezans</i>                  | 43.53 | -0.789 | high | Plant-skewed | 1 |
| <i>Carpornis cucullata Symplocos estrellensis</i>       | 43.52 | -0.335 | high | Plant-skewed | 1 |
| <i>Tyrannus melancholicus Citharexylum myrianthum</i>   | 43.41 | -0.874 | high | Plant-skewed | 4 |
| <i>Turdus flavipes Ilex theezans</i>                    | 43.40 | -0.793 | high | Plant-skewed | 1 |
| <i>Lipaugus lanioides Cupania oblongifolia</i>          | 43.39 | -0.703 | high | Plant-skewed | 1 |
| <i>Megarynchus pitangua Cupania oblongifolia</i>        | 43.38 | -0.703 | high | Plant-skewed | 2 |
| <i>Trogon surrucura Protium heptaphyllum</i>            | 43.37 | -0.347 | high | Plant-skewed | 1 |
| <i>Thraupis ornate Guapira opposita</i>                 | 43.36 | -0.919 | high | Plant-skewed | 1 |
| <i>Saltator similis Alchornea sidifolia</i>             | 43.35 | -0.847 | high | Plant-skewed | 1 |
| <i>Ramphocelus bresilius Citharexylum myrianthum</i>    | 43.33 | -0.877 | high | Plant-skewed | 1 |
| <i>Ramphocelus carbo Citharexylum myrianthum</i>        | 43.33 | -0.877 | high | Plant-skewed | 2 |
| <i>Ramphastos dicolorus Cupania oblongifolia</i>        | 43.29 | -0.706 | high | Plant-skewed | 1 |
| <i>Tityra cayana Schinus terebinthifolia</i>            | 43.27 | -0.234 | high | Plant-skewed | 1 |
| <i>Turdus rufiventris Erythroxylum pulchrum</i>         | 43.27 | -0.832 | high | Plant-skewed | 1 |
| <i>Schistochlamys ruficapillus Alchornea glandulosa</i> | 43.26 | -0.893 | high | Plant-skewed | 1 |
| <i>Orchesticus abeillei Marcgravia polyantha</i>        | 43.25 | -0.729 | high | Plant-skewed | 1 |
| <i>Tityra cayana Cecropia glaziovii</i>                 | 43.20 | -0.232 | high | Plant-skewed | 1 |
| <i>Pitangus sulphuratus Cabralea canjerana</i>          | 43.19 | -0.588 | high | Plant-skewed | 2 |
| <i>Icterus cayanensis Vitex megapotamica</i>            | 43.19 | -0.523 | high | Plant-skewed | 1 |
| <i>Ramphastos dicolorus Erythroxylum ambiguum</i>       | 43.11 | -0.704 | high | Plant-skewed | 1 |

|                                                        |       |        |      |              |   |
|--------------------------------------------------------|-------|--------|------|--------------|---|
| <i>Thraupis ornate Alchornea triplinervia</i>          | 43.09 | -0.918 | high | Plant-skewed | 1 |
| <i>Carpornis melanocephala Chrysophyllum flexuosum</i> | 43.05 | -0.323 | high | Plant-skewed | 1 |
| <i>Veniliornis spilogaster Cupania vernalis</i>        | 43.04 | -0.100 | high | Plant-skewed | 1 |
| <i>Xolmis velatus Erythroxylum deciduum</i>            | 43.03 | -0.690 | high | Plant-skewed | 1 |
| <i>Thraupis sayaca Guapira opposita</i>                | 42.88 | -0.931 | high | Plant-skewed | 2 |
| <i>Thraupis cyanoptera Maytenus gonoclada</i>          | 42.84 | -0.890 | high | Plant-skewed | 1 |
| <i>Turdus leucomelas Alchornea sidifolia</i>           | 42.82 | -0.861 | high | Plant-skewed | 1 |
| <i>Orthogonys chloricterus Norantea brasiliensis</i>   | 42.80 | -0.742 | high | Plant-skewed | 1 |
| <i>Cacicus haemorrhous Marcgravia polyantha</i>        | 42.76 | -0.744 | high | Plant-skewed | 1 |
| <i>Mionectes rufiventris Cabralea canjerana</i>        | 42.69 | -0.604 | high | Plant-skewed | 1 |
| <i>Orchesticus abeillei Cupania oblongifolia</i>       | 42.66 | -0.724 | high | Plant-skewed | 1 |
| <i>Tangara cayana Alchornea sidifolia</i>              | 42.62 | -0.866 | high | Plant-skewed | 1 |
| <i>Cacicus haemorrhous Cupania emarginata</i>          | 42.58 | -0.742 | high | Plant-skewed | 1 |
| <i>Turdus rufiventris Virola bicuhyba</i>              | 42.49 | -0.828 | high | Plant-skewed | 1 |
| <i>Tangara cyanocephala Alchornea glandulosa</i>       | 42.44 | -0.914 | high | Plant-skewed | 1 |
| <i>Tyrannus melancholicus Alchornea sidifolia</i>      | 42.44 | -0.871 | high | Plant-skewed | 1 |
| <i>Thraupis ornate Alchornea glandulosa</i>            | 42.34 | -0.917 | high | Plant-skewed | 1 |
| <i>Selenidera maculirostris Myrsine sp</i>             | 42.32 | 0.205  | high | Bird-skewed  | 1 |
| <i>Tangara desmaresti Alchornea triplinervia</i>       | 42.30 | -0.938 | high | Plant-skewed | 2 |
| <i>Myiozetetes similis Cupania oblongifolia</i>        | 42.29 | -0.735 | high | Plant-skewed | 2 |
| <i>Myiozetetes cayanensis Cupania oblongifolia</i>     | 42.29 | -0.735 | high | Plant-skewed | 1 |
| <i>Thraupis cyanoptera Myrtaceae sp</i>                | 42.26 | -0.888 | high | Plant-skewed | 1 |
| <i>Vireo olivaceus Trichilia clauseni</i>              | 42.26 | 0.427  | high | Bird-skewed  | 2 |
| <i>Turdus rufiventris Ilex theezans</i>                | 42.18 | -0.827 | high | Plant-skewed | 1 |
| <i>Cacicus haemorrhous Cupania oblongifolia</i>        | 42.17 | -0.739 | high | Plant-skewed | 1 |
| <i>Penelope obscura Symplocos uniflora</i>             | 42.09 | -0.591 | high | Plant-skewed | 1 |
| <i>Tityra cayana Xylopia brasiliensis</i>              | 42.08 | -0.195 | high | Plant-skewed | 1 |
| <i>Empidonomus varius Cupania oblongifolia</i>         | 41.99 | -0.744 | high | Plant-skewed | 1 |
| <i>Camptostoma obsoletum Cupania vernalis</i>          | 41.88 | -0.151 | high | Plant-skewed | 1 |
| <i>Tersina viridis Erythroxylum deciduum</i>           | 41.88 | -0.725 | high | Plant-skewed | 1 |

|                                                     |       |        |      |              |   |
|-----------------------------------------------------|-------|--------|------|--------------|---|
| <i>Lipaugus lanioides Copaifera trapezifolia</i>    | 41.86 | -0.688 | high | Plant-skewed | 1 |
| <i>Thraupis sayaca Alchornea glandulosa</i>         | 41.86 | -0.929 | high | Plant-skewed | 1 |
| <i>Pitangus sulphuratus Vitex megapotamica</i>      | 41.84 | -0.569 | high | Plant-skewed | 1 |
| <i>Attila phoenicurus Cabralea canjerana</i>        | 41.83 | -0.632 | high | Plant-skewed | 1 |
| <i>Attila rufus Cabralea canjerana</i>              | 41.83 | -0.632 | high | Plant-skewed | 1 |
| <i>Ramphastos dicolorus Copaifera trapezifolia</i>  | 41.76 | -0.691 | high | Plant-skewed | 1 |
| <i>Ramphastos vitellinus Copaifera trapezifolia</i> | 41.75 | -0.692 | high | Plant-skewed | 1 |
| <i>Pyroderus scutatus Persea willdenovii</i>        | 41.70 | -0.055 | high | Plant-skewed | 1 |
| <i>Myiozetetes similis Erythroxylum deciduum</i>    | 41.69 | -0.731 | high | Plant-skewed | 1 |
| <i>Vireo olivaceus Clusia criuva</i>                | 41.67 | 0.449  | high | Bird-skewed  | 2 |
| <i>Zonotrichia capensis Protium icicariba</i>       | 41.62 | -0.429 | high | Plant-skewed | 1 |
| <i>Turdus albicollis Marcgravia polyantha</i>       | 41.62 | -0.777 | high | Plant-skewed | 1 |
| <i>Pipraeidea melanonota Cabralea canjerana</i>     | 41.60 | -0.640 | high | Plant-skewed | 1 |
| <i>Myiodynastes maculatus Cabralea canjerana</i>    | 41.59 | -0.640 | high | Plant-skewed | 2 |
| <i>Trogon sarrucura Cecropia glaziovii</i>          | 41.57 | -0.299 | high | Plant-skewed | 1 |
| <i>Pipile jacutinga Nectandra grandiflora</i>       | 41.51 | 0.568  | high | Bird-skewed  | 1 |
| <i>Turdus flavipes Marcgravia polyantha</i>         | 41.49 | -0.781 | high | Plant-skewed | 1 |
| <i>Turdus leucomelas Virola bicuhyba</i>            | 41.48 | -0.856 | high | Plant-skewed | 1 |
| <i>Tityra cayana Cupania vernalis</i>               | 41.42 | -0.172 | high | Plant-skewed | 1 |
| <i>Empidonomus varius Erythroxylum deciduum</i>     | 41.40 | -0.740 | high | Plant-skewed | 1 |
| <i>Pipile jacutinga Allophylus edulis</i>           | 41.35 | 0.573  | high | Bird-skewed  | 1 |
| <i>Thraupis episcopus Maytenus gonoclada</i>        | 41.35 | -0.928 | high | Plant-skewed | 1 |
| <i>Thraupis sayaca Citharexylum myrianthum</i>      | 41.35 | -0.928 | high | Plant-skewed | 2 |
| <i>Thraupis episcopus Citharexylum myrianthum</i>   | 41.34 | -0.928 | high | Plant-skewed | 1 |
| <i>Trichothraupis melanops Marcgravia polyantha</i> | 41.22 | -0.789 | high | Plant-skewed | 1 |
| <i>Pipile jacutinga Nectandra membranacea</i>       | 41.21 | 0.578  | high | Bird-skewed  | 1 |
| <i>Colaptes campestris Erythroxylum deciduum</i>    | 41.16 | -0.747 | high | Plant-skewed | 1 |
| <i>Colaptes melanochloros Erythroxylum deciduum</i> | 41.16 | -0.747 | high | Plant-skewed | 1 |
| <i>Phibalura flavirostris Symplocos</i>             | 41.14 | -0.463 | high | Plant-skewed | 1 |



*glandulosomarginata*

|                                                            |       |        |      |              |   |
|------------------------------------------------------------|-------|--------|------|--------------|---|
| <i>Tyrannus melancholicus Chiococca alba</i>               | 41.09 | -0.866 | high | Plant-skewed | 1 |
| <i>Turdus albicollis Cupania oblongifolia</i>              | 41.03 | -0.773 | high | Plant-skewed | 2 |
| <i>Elaenia flavogaster Cupania oblongifolia</i>            | 41.02 | -0.773 | high | Plant-skewed | 1 |
| <i>Ramphocelus bresilius Chiococca alba</i>                | 41.00 | -0.869 | high | Plant-skewed | 1 |
| <i>Turdus flavipes Cupania oblongifolia</i>                | 40.90 | -0.777 | high | Plant-skewed | 1 |
| <i>Elaenia sp Erythroxylum deciduum</i>                    | 40.82 | -0.757 | high | Plant-skewed | 1 |
| <i>Procnias nudicollis Cupania vernalis</i>                | 40.80 | -0.199 | high | Plant-skewed | 1 |
| <i>Turdus amaurochalinus Vitex megapotamica</i>            | 40.76 | -0.606 | high | Plant-skewed | 1 |
| <i>Habia rubica Xylopia brasiliensis</i>                   | 40.72 | -0.253 | high | Plant-skewed | 1 |
| <i>Dacnis cayana Cupania oblongifolia</i>                  | 40.56 | -0.787 | high | Plant-skewed | 1 |
| <i>Megarynchus pitangua Cabralea canjerana</i>             | 40.52 | -0.675 | high | Plant-skewed | 2 |
| <i>Camptostoma obsoletum Myrsine coriacea</i>              | 40.45 | -0.094 | high | Plant-skewed | 1 |
| <i>Ramphastos dicolorus Cabralea canjerana</i>             | 40.43 | -0.678 | high | Plant-skewed | 1 |
| <i>Elaenia flavogaster Erythroxylum deciduum</i>           | 40.42 | -0.769 | high | Plant-skewed | 1 |
| <i>Thraupis sayaca Alchornea sidifolia</i>                 | 40.38 | -0.926 | high | Plant-skewed | 1 |
| <i>Pyroderus scutatus Nectandra megapotamica</i>           | 40.36 | 0.008  | high | Bird-skewed  | 1 |
| <i>Manacus manacus Protium heptaphyllum</i>                | 40.27 | -0.465 | high | Plant-skewed | 1 |
| <i>Thraupis palmarum Syagrus romanzoffiana</i>             | 40.17 | -0.913 | high | Plant-skewed | 1 |
| <i>Habia rubica Cupania vernalis</i>                       | 40.06 | -0.231 | high | Plant-skewed | 1 |
| <i>Elaenia flavogaster Erythroxylum ovalifolium</i>        | 40.03 | -0.767 | high | Plant-skewed | 1 |
| <i>Zonotrichia capensis Cecropia pachystachya</i>          | 39.99 | -0.392 | high | Plant-skewed | 1 |
| <i>Tityra cayana Myrsine coriacea</i>                      | 39.98 | -0.116 | high | Plant-skewed | 1 |
| <i>Dacnis cayana Erythroxylum deciduum</i>                 | 39.97 | -0.783 | high | Plant-skewed | 1 |
| <i>Chiroxiphia caudate Marcgravia polyantha</i>            | 39.89 | -0.828 | high | Plant-skewed | 1 |
| <i>Thraupis episcopus Erythroxylum pulchrum</i>            | 39.80 | -0.925 | high | Plant-skewed | 1 |
| <i>Melanerpes flavifrons Cecropia glaziovii</i>            | 39.77 | -0.373 | high | Plant-skewed | 1 |
| <i>Melanerpes candidus Cecropia glaziovii</i>              | 39.77 | -0.373 | high | Plant-skewed | 1 |
| <i>Schiffornis virescens Clusia criuva</i>                 | 39.75 | 0.407  | high | Bird-skewed  | 1 |
| <i>Pteroglossus bailloni Symplocos glandulosomarginata</i> | 39.73 | -0.516 | high | Plant-skewed | 1 |

|                                                            |       |        |      |              |   |
|------------------------------------------------------------|-------|--------|------|--------------|---|
| <i>Ramphastos dicolorus Symplocos uniflora</i>             | 39.72 | -0.670 | high | Plant-skewed | 1 |
| <i>Ramphastos vitellinus Symplocos uniflora</i>            | 39.71 | -0.671 | high | Plant-skewed | 1 |
| <i>Conopias trivirgatus Myrsine lancifolia</i>             | 39.68 | 0.007  | high | Bird-skewed  | 1 |
| <i>Turdus rufiventris Cupania oblongifolia</i>             | 39.67 | -0.814 | high | Plant-skewed | 2 |
| <i>Zonotrichia capensis Schinus terebinthifolia</i>        | 39.63 | -0.383 | high | Plant-skewed | 2 |
| <i>Zonotrichia capensis Lithraea molleoides</i>            | 39.63 | -0.383 | high | Plant-skewed | 1 |
| <i>Procnias nudicollis Persea willdenovii</i>              | 39.59 | -0.154 | high | Plant-skewed | 1 |
| <i>Stephanophorus diadematus Symplocos uniflora</i>        | 39.58 | -0.675 | high | Plant-skewed | 1 |
| <i>Oxyruncus cristatus Miconia latecrenata</i>             | 39.57 | 0.875  | high | Bird-skewed  | 1 |
| <i>Schistochlamys ruficapillus Erythroxylum gonocladum</i> | 39.54 | -0.882 | high | Plant-skewed | 1 |
| <i>Turdus rufiventris Erythroxylum ambiguum</i>            | 39.50 | -0.813 | high | Plant-skewed | 1 |
| <i>Ramphastos dicolorus Symplocos sp</i>                   | 39.49 | -0.668 | high | Plant-skewed | 1 |
| <i>Myiozetetes similis Cabralea canjerana</i>              | 39.43 | -0.711 | high | Plant-skewed | 1 |
| <i>Penelope obscura Geonoma gamiova</i>                    | 39.43 | -0.551 | high | Plant-skewed | 1 |
| <i>Celeus flavescens Protium heptaphyllum</i>              | 39.36 | -0.500 | high | Plant-skewed | 1 |
| <i>Euphonia chlorotica Vitex megapotamica</i>              | 39.35 | -0.654 | high | Plant-skewed | 1 |
| <i>Mionectes rufiventris Geonoma gamiova</i>               | 39.32 | -0.555 | high | Plant-skewed | 1 |
| <i>Cacicus haemorrhous Cabralea canjerana</i>              | 39.31 | -0.715 | high | Plant-skewed | 1 |
| <i>Cacicus chrysopterus Cabralea canjerana</i>             | 39.31 | -0.715 | high | Plant-skewed | 1 |
| <i>Pyroderus scutatus Ilex brevicuspis</i>                 | 39.23 | 0.064  | high | Bird-skewed  | 1 |
| <i>Tolmomyias flaviventris Xylopi sericea</i>              | 39.21 | -0.302 | high | Plant-skewed | 1 |
| <i>Empidonomus varius Cabralea canjerana</i>               | 39.14 | -0.720 | high | Plant-skewed | 2 |
| <i>Chiroxiphia caudate Erythroxylum ambiguum</i>           | 39.12 | -0.824 | high | Plant-skewed | 1 |
| <i>Turdus rufiventris Erythroxylum deciduum</i>            | 39.08 | -0.810 | high | Plant-skewed | 1 |
| <i>Ramphastos dicolorus Vitex polygama</i>                 | 39.08 | -0.663 | high | Plant-skewed | 1 |
| <i>Stephanophorus diadematus Gaylussacia brasiliensis</i>  | 39.07 | -0.670 | high | Plant-skewed | 1 |
| <i>Trogon viridis Psychotria mapourioides</i>              | 39.06 | 0.708  | high | Bird-skewed  | 1 |
| <i>Zonotrichia capensis Ptilosocereus arrabidae</i>        | 39.06 | -0.368 | high | Plant-skewed | 1 |

|                                                         |       |        |      |              |   |
|---------------------------------------------------------|-------|--------|------|--------------|---|
| <i>Penelope obscura Symplocos glandulosomarginata</i>   | 38.98 | -0.544 | high | Plant-skewed | 1 |
| <i>Manacus manacus Cecropia pachystachya</i>            | 38.90 | -0.436 | high | Plant-skewed | 1 |
| <i>Pitangus sulphuratus Protium heptaphyllum</i>        | 38.84 | -0.520 | high | Plant-skewed | 1 |
| <i>Carpornis cucullata Persea willdenovii</i>           | 38.82 | -0.189 | high | Plant-skewed | 1 |
| <i>Icterus cayanensis Cecropia pachystachya</i>         | 38.82 | -0.439 | high | Plant-skewed | 1 |
| <i>Mimus saturninus Myrsine sp</i>                      | 38.79 | 0.065  | high | Bird-skewed  | 1 |
| <i>Procnias nudicollis Ficus sp</i>                     | 38.79 | -0.121 | high | Plant-skewed | 1 |
| <i>Pachyramphus validus Xylopia brasiliensis</i>        | 38.74 | -0.338 | high | Plant-skewed | 1 |
| <i>Tyrannus melancholicus Cupania emarginata</i>        | 38.70 | -0.857 | high | Plant-skewed | 1 |
| <i>Turdus leucomelas Cupania oblongifolia</i>           | 38.66 | -0.844 | high | Plant-skewed | 2 |
| <i>Schistochlamys ruficapillus Byrsonima variabilis</i> | 38.65 | -0.878 | high | Plant-skewed | 1 |
| <i>Coryphospingus pileatus Erythroxylum ovalifolium</i> | 38.64 | -0.809 | high | Plant-skewed | 1 |
| <i>Myiarchus swainsoni Erythroxylum deciduum</i>        | 38.62 | -0.824 | high | Plant-skewed | 1 |
| <i>Myiopagis caniceps Myrsine lancifolia</i>            | 38.60 | -0.047 | high | Plant-skewed | 1 |
| <i>Cacicus chrysopterus Symplocos uniflora</i>          | 38.60 | -0.708 | high | Plant-skewed | 1 |
| <i>Saltator similis Erythroxylum deciduum</i>           | 38.60 | -0.825 | high | Plant-skewed | 1 |
| <i>Carpornis cucullata Myrsine coriacea</i>             | 38.60 | -0.181 | high | Plant-skewed | 1 |
| <i>Tityra inquisitor Myrsine lancifolia</i>             | 38.54 | -0.051 | high | Plant-skewed | 1 |
| <i>Penelope sp Symplocos sp</i>                         | 38.50 | -0.701 | high | Plant-skewed | 1 |
| <i>Turdus leucomelas Erythroxylum ambiguum</i>          | 38.48 | -0.843 | high | Plant-skewed | 1 |
| <i>Pachyramphus polychopterus Xylopia sericea</i>       | 38.46 | -0.335 | high | Plant-skewed | 1 |
| <i>Pipile jacutinga Guarea macrophylla</i>              | 38.39 | 0.675  | high | Bird-skewed  | 1 |
| <i>Selenidera maculirostris Clusia criuva</i>           | 38.38 | 0.372  | high | Bird-skewed  | 1 |
| <i>Tityra cayana Matayba guianensis</i>                 | 38.33 | -0.041 | high | Plant-skewed | 1 |
| <i>Thraupis cyanoptera Marcgravia polyantha</i>         | 38.29 | -0.875 | high | Plant-skewed | 1 |
| <i>Tyrannus melancholicus Cupania oblongifolia</i>      | 38.29 | -0.855 | high | Plant-skewed | 2 |
| <i>Stephanophorus diadematus Gaylussacia pulchra</i>    | 38.25 | -0.660 | high | Plant-skewed | 1 |
| <i>Procnias nudicollis Nectandra megapotamica</i>       | 38.24 | -0.097 | high | Plant-skewed | 1 |

|                                                     |       |        |      |              |   |
|-----------------------------------------------------|-------|--------|------|--------------|---|
| <i>Saltator fuliginosus Cabralea canjerana</i>      | 38.22 | -0.750 | high | Plant-skewed | 1 |
| <i>Ramphocelus bresilius Cupania oblongifolia</i>   | 38.20 | -0.858 | high | Plant-skewed | 1 |
| <i>Turdus albicollis Cabralea canjerana</i>         | 38.17 | -0.752 | high | Plant-skewed | 2 |
| <i>Pyroderus scutatus Myrsine umbellata</i>         | 38.11 | 0.119  | high | Bird-skewed  | 1 |
| <i>Mimus gilvus Myrsine parvifolia</i>              | 38.09 | 0.100  | high | Bird-skewed  | 1 |
| <i>Pachyramphus validus Cupania vernalis</i>        | 38.08 | -0.319 | high | Plant-skewed | 1 |
| <i>Myiarchus ferox Erythroxylum deciduum</i>        | 38.08 | -0.841 | high | Plant-skewed | 1 |
| <i>Turdus leucomelas Erythroxylum deciduum</i>      | 38.07 | -0.841 | high | Plant-skewed | 1 |
| <i>Chiroxiphia caudate Inga marginata</i>           | 38.06 | -0.818 | high | Plant-skewed | 1 |
| <i>Turdus flavipes Cabralea canjerana</i>           | 38.04 | -0.756 | high | Plant-skewed | 1 |
| <i>Carpornis cucullata Ficus sp</i>                 | 38.02 | -0.158 | high | Plant-skewed | 1 |
| <i>Hylophilus poicilotis Cupania vernalis</i>       | 38.01 | -0.322 | high | Plant-skewed | 1 |
| <i>Celeus flavescens Cecropia pachystachya</i>      | 37.99 | -0.472 | high | Plant-skewed | 1 |
| <i>Nemosia pileata Cecropia pachystachya</i>        | 37.94 | -0.474 | high | Plant-skewed | 1 |
| <i>Poospiza lateralis Symplocos uniflora</i>        | 37.93 | -0.730 | high | Plant-skewed | 1 |
| <i>Tangara cayana Erythroxylum deciduum</i>         | 37.87 | -0.847 | high | Plant-skewed | 1 |
| <i>Oxyruncus cristatus Myrcia splendens</i>         | 37.87 | 0.923  | high | Bird-skewed  | 1 |
| <i>Elaenia sp Symplocos uniflora</i>                | 37.85 | -0.733 | high | Plant-skewed | 2 |
| <i>Volatinia jacarina Protium icicariba</i>         | 37.85 | -0.572 | high | Plant-skewed | 1 |
| <i>Euphonia violacea Protium heptaphyllum</i>       | 37.84 | -0.558 | high | Plant-skewed | 1 |
| <i>Pteroglossus bailloni Cecropia pachystachya</i>  | 37.82 | -0.479 | high | Plant-skewed | 1 |
| <i>Myiarchus sp Erythroxylum deciduum</i>           | 37.82 | -0.849 | high | Plant-skewed | 1 |
| <i>Trogon surrucura Ficus sp</i>                    | 37.78 | -0.170 | high | Plant-skewed | 1 |
| <i>Turdus amaurochalinus Protium heptaphyllum</i>   | 37.76 | -0.561 | high | Plant-skewed | 1 |
| <i>Procnias nudicollis Matayba elaeagnoides</i>     | 37.71 | -0.073 | high | Plant-skewed | 1 |
| <i>Dacnis cayana Cabralea canjerana</i>             | 37.70 | -0.767 | high | Plant-skewed | 2 |
| <i>Tyrannus savana Erythroxylum deciduum</i>        | 37.69 | -0.853 | high | Plant-skewed | 1 |
| <i>Tyrannus melancholicus Erythroxylum deciduum</i> | 37.69 | -0.853 | high | Plant-skewed | 1 |
| <i>Celeus flavescens Cecropia glaziovii</i>         | 37.56 | -0.463 | high | Plant-skewed | 1 |
| <i>Phylloscartes ventralis Myrsine coriacea</i>     | 37.53 | -0.231 | high | Plant-skewed | 1 |

|                                                           |       |        |      |              |   |
|-----------------------------------------------------------|-------|--------|------|--------------|---|
| <i>Elaenia obscura Schinus terebinthifolia</i>            | 37.51 | -0.469 | high | Plant-skewed | 1 |
| <i>Cissopis leverianus Cabralea canjerana</i>             | 37.50 | -0.774 | high | Plant-skewed | 1 |
| <i>Carpornis cucullata Nectandra megapotamica</i>         | 37.47 | -0.135 | high | Plant-skewed | 1 |
| <i>Pitangus sulphuratus Cecropia pachystachya</i>         | 37.47 | -0.493 | high | Plant-skewed | 2 |
| <i>Turdus albicollis Symplocos uniflora</i>               | 37.46 | -0.746 | high | Plant-skewed | 2 |
| <i>Elaenia flavogaster Symplocos uniflora</i>             | 37.45 | -0.746 | high | Plant-skewed | 1 |
| <i>Pteroglossus bailloni Cecropia glaziovii</i>           | 37.39 | -0.470 | high | Plant-skewed | 2 |
| <i>Mimus saturninus Ficus organensis</i>                  | 37.39 | 0.135  | high | Bird-skewed  | 1 |
| <i>Trogon viridis Amaioua intermedia</i>                  | 37.38 | 0.763  | high | Bird-skewed  | 1 |
| <i>Turdus flavipes Symplocos uniflora</i>                 | 37.33 | -0.750 | high | Plant-skewed | 1 |
| <i>Turdus albicollis Symplocos sp</i>                     | 37.23 | -0.744 | high | Plant-skewed | 1 |
| <i>Carpornis cucullata Myrsine lancifolia</i>             | 37.15 | -0.121 | high | Plant-skewed | 1 |
| <i>Manacus manacus Xylopia sericea</i>                    | 37.12 | -0.392 | high | Plant-skewed | 1 |
| <i>Pitangus sulphuratus Schinus terebinthifolia</i>       | 37.11 | -0.486 | high | Plant-skewed | 3 |
| <i>Camptostoma obsoletum Myrsine umbellata</i>            | 37.07 | 0.072  | high | Bird-skewed  | 1 |
| <i>Ramphastos dicolorus Geonoma gamiova</i>               | 37.06 | -0.638 | high | Plant-skewed | 1 |
| <i>Pitangus sulphuratus Cecropia glaziovii</i>            | 37.04 | -0.484 | high | Plant-skewed | 1 |
| <i>Carpornis melanocephala Matayba elaeagnoides</i>       | 36.95 | -0.112 | high | Plant-skewed | 1 |
| <i>Neopelma aurifrons Coccocypselum hasslerianum</i>      | 36.82 | -0.263 | high | Plant-skewed | 1 |
| <i>Turdus albicollis Vitex megapotamica</i>               | 36.82 | -0.741 | high | Plant-skewed | 1 |
| <i>Turdus rufiventris Cabralea canjerana</i>              | 36.82 | -0.796 | high | Plant-skewed | 1 |
| <i>Thraupis ornate Cupania oblongifolia</i>               | 36.70 | -0.903 | high | Plant-skewed | 1 |
| <i>Thraupis palmarum Cupania oblongifolia</i>             | 36.66 | -0.904 | high | Plant-skewed | 1 |
| <i>Penelope obscura Cecropia glaziovii</i>                | 36.65 | -0.500 | high | Plant-skewed | 1 |
| <i>Euphonia chlorotica Protium icicariba</i>              | 36.62 | -0.618 | high | Plant-skewed | 1 |
| <i>Ramphastos dicolorus Symplocos glandulosomarginata</i> | 36.62 | -0.632 | high | Plant-skewed | 1 |
| <i>Pachyramphus polychopterus Myrsine coriacea</i>        | 36.58 | -0.276 | high | Plant-skewed | 2 |
| <i>Hylophilus poicilotis Myrsine coriacea</i>             | 36.58 | -0.276 | high | Plant-skewed | 1 |

|                                                                |       |        |      |              |   |
|----------------------------------------------------------------|-------|--------|------|--------------|---|
| <i>Melanerpes flavifrons Myrsine coriacea</i>                  | 36.55 | -0.277 | high | Plant-skewed | 1 |
| <i>Cyanerpes cyaneus Protium icariba</i>                       | 36.54 | -0.621 | high | Plant-skewed | 1 |
| <i>Euphonia pectoralis Cecropia glaziovii</i>                  | 36.50 | -0.506 | high | Plant-skewed | 1 |
| <i>Stephanophorus diadematus Symplocos glandulosomarginata</i> | 36.47 | -0.638 | high | Plant-skewed | 1 |
| <i>Euphonia violacea Cecropia pachystachya</i>                 | 36.47 | -0.533 | high | Plant-skewed | 1 |
| <i>Chiroxiphia caudate Cabralea canjerana</i>                  | 36.44 | -0.809 | high | Plant-skewed | 2 |
| <i>Turdus amaurochalinus Cecropia pachystachya</i>             | 36.39 | -0.537 | high | Plant-skewed | 1 |
| <i>Chiroxiphia caudate Guatteria australis</i>                 | 36.39 | -0.808 | high | Plant-skewed | 1 |
| <i>Euphonia chlorotica Protium heptaphyllum</i>                | 36.36 | -0.614 | high | Plant-skewed | 1 |
| <i>Zonotrichia capensis Myrsine coriacea</i>                   | 36.34 | -0.287 | high | Plant-skewed | 2 |
| <i>Saltator similis Cabralea canjerana</i>                     | 36.33 | -0.812 | high | Plant-skewed | 2 |
| <i>Parula pitiayumi Schinus terebinthifolia</i>                | 36.33 | -0.518 | high | Plant-skewed | 2 |
| <i>Lipaugus lanioides Mollinedia sp</i>                        | 36.32 | -0.623 | high | Plant-skewed | 1 |
| <i>Vireo olivaceus Guarea guidonia</i>                         | 36.28 | 0.650  | high | Bird-skewed  | 1 |
| <i>Cyanerpes cyaneus Protium heptaphyllum</i>                  | 36.27 | -0.617 | high | Plant-skewed | 1 |
| <i>Pteroglossus bailloni Xylopia brasiliensis</i>              | 36.27 | -0.444 | high | Plant-skewed | 1 |
| <i>Thraupis sayaca Cupania oblongifolia</i>                    | 36.22 | -0.917 | high | Plant-skewed | 1 |
| <i>Volatinia jacarina Cecropia pachystachya</i>                | 36.22 | -0.544 | high | Plant-skewed | 1 |
| <i>Turdus subalaris Myrsine coriacea</i>                       | 36.21 | -0.294 | high | Plant-skewed | 1 |
| <i>Turdus rufiventris Symplocos uniflora</i>                   | 36.11 | -0.791 | high | Plant-skewed | 1 |
| <i>Euphonia violacea Schinus terebinthifolia</i>               | 36.11 | -0.527 | high | Plant-skewed | 2 |
| <i>Trogon surrucura Ilex brevicuspis</i>                       | 36.10 | -0.096 | high | Plant-skewed | 1 |
| <i>Selenidera maculirostris Ocotea odorifera</i>               | 36.08 | 0.469  | high | Bird-skewed  | 1 |
| <i>Euphonia violacea Cecropia glaziovii</i>                    | 36.04 | -0.525 | high | Plant-skewed | 1 |
| <i>Turdus amaurochalinus Schinus terebinthifolia</i>           | 36.03 | -0.530 | high | Plant-skewed | 2 |
| <i>Phylloscartes oustaleti Myrsine lancifolia</i>              | 35.95 | -0.181 | high | Plant-skewed | 1 |
| <i>Coereba flaveola Protium heptaphyllum</i>                   | 35.92 | -0.631 | high | Plant-skewed | 1 |
| <i>Pitangus sulphuratus Xylopia brasiliensis</i>               | 35.92 | -0.459 | high | Plant-skewed | 1 |
| <i>Tangara desmaresti Cupania oblongifolia</i>                 | 35.92 | -0.926 | high | Plant-skewed | 1 |
| <i>Trogon viridis Miconia valtheri</i>                         | 35.89 | 0.813  | high | Bird-skewed  | 1 |

|                                                       |       |        |      |              |   |
|-------------------------------------------------------|-------|--------|------|--------------|---|
| <i>Turdus rufiventris Symplocos sp</i>                | 35.88 | -0.790 | high | Plant-skewed | 1 |
| <i>Volatinia jacarina Schinus terebinthifolia</i>     | 35.86 | -0.537 | high | Plant-skewed | 1 |
| <i>Elaenia mesoleuca Symplocos uniflora</i>           | 35.83 | -0.801 | high | Plant-skewed | 1 |
| <i>Myiarchus ferox Cabralea canjerana</i>             | 35.82 | -0.829 | high | Plant-skewed | 1 |
| <i>Turdus leucomelas Cabralea canjerana</i>           | 35.81 | -0.829 | high | Plant-skewed | 1 |
| <i>Trogon viridis Myrcia spectabilis</i>              | 35.71 | 0.819  | high | Bird-skewed  | 1 |
| <i>Saltator maximus Protium heptaphyllum</i>          | 35.66 | -0.641 | high | Plant-skewed | 1 |
| <i>Thraupis sayaca Erythroxylum deciduum</i>          | 35.63 | -0.915 | high | Plant-skewed | 1 |
| <i>Saltator similis Symplocos uniflora</i>            | 35.63 | -0.807 | high | Plant-skewed | 1 |
| <i>Phibalura flavirostris Myrsine coriacea</i>        | 35.59 | -0.323 | high | Plant-skewed | 1 |
| <i>Myiarchus sp Cabralea canjerana</i>                | 35.56 | -0.837 | high | Plant-skewed | 1 |
| <i>Mimus gilvus Ocotea notata</i>                     | 35.54 | 0.227  | high | Bird-skewed  | 1 |
| <i>Myiodynastes maculatus Schinus terebinthifolia</i> | 35.52 | -0.551 | high | Plant-skewed | 1 |
| <i>Turdus albicollis Mollinedia schottiana</i>        | 35.51 | -0.728 | high | Plant-skewed | 2 |
| <i>Ramphastos vitellinus Chrysophyllum flexuosum</i>  | 35.50 | -0.617 | high | Plant-skewed | 1 |
| <i>Ilicura militaris Myrsine coriacea</i>             | 35.49 | -0.327 | high | Plant-skewed | 1 |
| <i>Turdus rufiventris Vitex megapotamica</i>          | 35.47 | -0.787 | high | Plant-skewed | 1 |
| <i>Tyrannus savana Cabralea canjerana</i>             | 35.43 | -0.842 | high | Plant-skewed | 1 |
| <i>Tyrannus melancholicus Cabralea canjerana</i>      | 35.43 | -0.842 | high | Plant-skewed | 1 |
| <i>Trogon viridis Myrcia pubipetala</i>               | 35.40 | 0.829  | high | Bird-skewed  | 1 |
| <i>Euphonia pectoralis Xylopiya brasiliensis</i>      | 35.38 | -0.483 | high | Plant-skewed | 1 |
| <i>Carpornis cucullata Myrsine venosa</i>             | 35.37 | -0.034 | high | Plant-skewed | 1 |
| <i>Volatinia jacarina Pilosocereus arrabidae</i>      | 35.29 | -0.526 | high | Plant-skewed | 1 |
| <i>Trogon viridis Ficus luschnathiana</i>             | 35.29 | 0.833  | high | Bird-skewed  | 1 |
| <i>Lipaugus lanioides Mollinedia triflora</i>         | 35.28 | -0.607 | high | Plant-skewed | 1 |
| <i>Lipaugus lanioides Protium widgrenii</i>           | 35.25 | -0.607 | high | Plant-skewed | 1 |
| <i>Manacus manacus Myrsine coriacea</i>               | 35.25 | -0.339 | high | Plant-skewed | 1 |
| <i>Carpornis cucullata Myrsine umbellata</i>          | 35.22 | -0.026 | high | Plant-skewed | 1 |
| <i>Mionectes oleaginous Xylopiya sericea</i>          | 35.20 | -0.476 | high | Plant-skewed | 1 |

|                                                          |       |        |      |              |   |
|----------------------------------------------------------|-------|--------|------|--------------|---|
| <i>Contopus cinereus Myrsine coriacea</i>                | 35.19 | -0.341 | high | Plant-skewed | 1 |
| <i>Turdus albicollis Symplocos tetrandra</i>             | 35.16 | -0.725 | high | Plant-skewed | 1 |
| <i>Ramphastos vitellinus Protium widgrenii</i>           | 35.14 | -0.611 | high | Plant-skewed | 1 |
| <i>Pachyramphus castaneus Myrsine lancifolia</i>         | 35.14 | -0.223 | high | Plant-skewed | 1 |
| <i>Hylophilus poicilotis Myrsine lancifolia</i>          | 35.13 | -0.223 | high | Plant-skewed | 1 |
| <i>Melanerpes flavifrons Myrsine lancifolia</i>          | 35.10 | -0.225 | high | Plant-skewed | 1 |
| <i>Pachyramphus validus Matayba guianensis</i>           | 35.00 | -0.211 | high | Plant-skewed | 1 |
| <i>Euphonia chlorotica Cecropia pachystachya</i>         | 34.99 | -0.593 | high | Plant-skewed | 1 |
| <i>Cacicus haemorrhous Protium heptaphyllum</i>          | 34.96 | -0.667 | high | Plant-skewed | 1 |
| <i>Tangara preciosa Symplocos uniflora</i>               | 34.85 | -0.833 | high | Plant-skewed | 1 |
| <i>Mimus gilvus Clusia hilariana</i>                     | 34.85 | 0.262  | high | Bird-skewed  | 1 |
| <i>Turdus albicollis Geonoma gamiova</i>                 | 34.80 | -0.721 | high | Plant-skewed | 2 |
| <i>Ramphastos vitellinus Cecropia pachystachya</i>       | 34.70 | -0.605 | high | Plant-skewed | 1 |
| <i>Coereba flaveola Cecropia pachystachya</i>            | 34.55 | -0.611 | high | Plant-skewed | 3 |
| <i>Basileuterus flaveolus Cecropia pachystachya</i>      | 34.42 | -0.616 | high | Plant-skewed | 1 |
| <i>Lipaugus lanioides Cecropia glaziovii</i>             | 34.38 | -0.593 | high | Plant-skewed | 1 |
| <i>Turdus albicollis Symplocos glandulosomarginata</i>   | 34.36 | -0.717 | high | Plant-skewed | 1 |
| <i>Elaenia flavogaster Symplocos glandulosomarginata</i> | 34.35 | -0.717 | high | Plant-skewed | 1 |
| <i>Celeus flavescens Myrsine coriacea</i>                | 34.34 | -0.381 | high | Plant-skewed | 2 |
| <i>Myiodynastes maculatus Xylopia brasiliensis</i>       | 34.32 | -0.528 | high | Plant-skewed | 1 |
| <i>Turdus amaurochalinus Xylopia langsdorfiana</i>       | 34.28 | -0.494 | high | Plant-skewed | 1 |
| <i>Ramphastos dicolorus Cecropia glaziovii</i>           | 34.28 | -0.597 | high | Plant-skewed | 2 |
| <i>Trogon viridisLeandra variabilis</i>                  | 34.27 | 0.866  | high | Bird-skewed  | 1 |
| <i>Ramphastos vitellinus Cecropia glaziovii</i>          | 34.27 | -0.598 | high | Plant-skewed | 1 |
| <i>Pitangus sulphuratus Persea major</i>                 | 34.23 | -0.417 | high | Plant-skewed | 1 |
| <i>Elaenia obscura Myrsine coriacea</i>                  | 34.22 | -0.387 | high | Plant-skewed | 1 |
| <i>Stephanophorus diadematus Schinus terebinthifolia</i> | 34.21 | -0.604 | high | Plant-skewed | 1 |
| <i>Coereba flaveola Schinus terebinthifolia</i>          | 34.19 | -0.605 | high | Plant-skewed | 2 |



|                                                             |       |        |      |              |   |
|-------------------------------------------------------------|-------|--------|------|--------------|---|
| <i>Pteroglossus bailloni Myrsine coriacea</i>               | 34.17 | -0.389 | high | Plant-skewed | 1 |
| <i>Stephanophorus diadematus Cecropia glaziovii</i>         | 34.13 | -0.603 | high | Plant-skewed | 1 |
| <i>Coereba flaveola Cecropia glaziovii</i>                  | 34.12 | -0.604 | high | Plant-skewed | 1 |
| <i>Pipra pipra Protium heptaphyllum</i>                     | 34.08 | -0.701 | high | Plant-skewed | 1 |
| <i>Tyrannus melancholicus Vitex megapotamica</i>            | 34.08 | -0.834 | high | Plant-skewed | 1 |
| <i>Pipile jacutinga Miconia inconspicua</i>                 | 34.07 | 0.824  | high | Bird-skewed  | 1 |
| <i>Antilophia galeata Cecropia pachystachya</i>             | 34.07 | -0.630 | high | Plant-skewed | 1 |
| <i>Euphonia chlorotica Pilosocereus arrabidae</i>           | 34.06 | -0.577 | high | Plant-skewed | 1 |
| <i>Schiffornis virescens Psychotria vellosiana</i>          | 34.06 | 0.635  | high | Bird-skewed  | 1 |
| <i>Ilicura militaris Myrsine lancifolia</i>                 | 34.05 | -0.278 | high | Plant-skewed | 1 |
| <i>Pipile jacutinga Ficus pertusa</i>                       | 34.05 | 0.825  | high | Bird-skewed  | 1 |
| <i>Pipile jacutinga Ficus luschnathiana</i>                 | 34.05 | 0.825  | high | Bird-skewed  | 1 |
| <i>Camptostoma obsoletum Clusia criuva</i>                  | 34.03 | 0.230  | high | Bird-skewed  | 1 |
| <i>Tachyphonus cristatus Cecropia pachystachya</i>          | 34.01 | -0.632 | high | Plant-skewed | 1 |
| <i>Trogon viridis Eugenia mosenii</i>                       | 33.96 | 0.877  | high | Bird-skewed  | 1 |
| <i>Tersina viridis Cecropia pachystachya</i>                | 33.90 | -0.637 | high | Plant-skewed | 1 |
| <i>Attila rufus Cupania vernalis</i>                        | 33.90 | -0.504 | high | Plant-skewed | 1 |
| <i>Schiffornis virescens Psychotria suterella</i>           | 33.90 | 0.641  | high | Bird-skewed  | 1 |
| <i>Zonotrichia capensis Myrsine sp</i>                      | 33.87 | -0.193 | high | Plant-skewed | 1 |
| <i>Pitangus sulphuratus Myrsine coriacea</i>                | 33.82 | -0.406 | high | Plant-skewed | 2 |
| <i>Chiroxiphia caudate Mollinedia schottiana</i>            | 33.78 | -0.790 | high | Plant-skewed | 1 |
| <i>Myiozetetes similis Cecropia pachystachya</i>            | 33.71 | -0.644 | high | Plant-skewed | 3 |
| <i>Antilophia galeata Schinus terebinthifolia</i>           | 33.71 | -0.624 | high | Plant-skewed | 1 |
| <i>Turdus flavipes Protium heptaphyllum</i>                 | 33.69 | -0.716 | high | Plant-skewed | 2 |
| <i>Myiodynastes maculatus Cupania vernalis</i>              | 33.66 | -0.514 | high | Plant-skewed | 1 |
| <i>Penelope obscura Persea willdenovii</i>                  | 33.65 | -0.430 | high | Plant-skewed | 1 |
| <i>Attila rufus Mollinedia boracensis</i>                   | 33.59 | -0.497 | high | Plant-skewed | 1 |
| <i>Tangara cayana Gaylussacia pulchra</i>                   | 33.57 | -0.824 | high | Plant-skewed | 1 |
| <i>Schistochlamys ruficapillus Gaylussacia brasiliensis</i> | 33.56 | -0.857 | high | Plant-skewed | 1 |
| <i>Icterus cayanensis Matayba guianensis</i>                | 33.52 | -0.287 | high | Plant-skewed | 1 |

|                                                               |       |        |      |              |   |
|---------------------------------------------------------------|-------|--------|------|--------------|---|
| <i>Thlypopsis sordida</i> <i>Cecropia pachystachya</i>        | 33.50 | -0.653 | high | Plant-skewed | 1 |
| <i>Penelope obscura</i> <i>Myrsine coriacea</i>               | 33.43 | -0.424 | high | Plant-skewed | 1 |
| <i>Penelope obscura</i> <i>Coccocypselum hasslerianum</i>     | 33.41 | -0.424 | high | Plant-skewed | 1 |
| <i>Dacnis cayana</i> <i>Protium heptaphyllum</i>              | 33.36 | -0.729 | high | Plant-skewed | 1 |
| <i>Myiozetetes similis</i> <i>Schinus terebinthifolia</i>     | 33.35 | -0.639 | high | Plant-skewed | 3 |
| <i>Mionectes rufiventris</i> <i>Myrsine coriacea</i>          | 33.32 | -0.429 | high | Plant-skewed | 1 |
| <i>Mionectes oleaginous</i> <i>Myrsine coriacea</i>           | 33.32 | -0.429 | high | Plant-skewed | 1 |
| <i>Euphonia pectoralis</i> <i>Myrsine coriacea</i>            | 33.28 | -0.431 | high | Plant-skewed | 1 |
| <i>Lipaugus lanioides</i> <i>Xylopia brasiliensis</i>         | 33.26 | -0.573 | high | Plant-skewed | 1 |
| <i>Cacicus haemorrhous</i> <i>Schinus terebinthifolia</i>     | 33.23 | -0.644 | high | Plant-skewed | 1 |
| <i>Orthogonys chloricterus</i> <i>Cecropia glaziovii</i>      | 33.21 | -0.641 | high | Plant-skewed | 1 |
| <i>Melanerpes flavifrons</i> <i>Myrsine umbellata</i>         | 33.17 | -0.141 | high | Plant-skewed | 1 |
| <i>Cacicus haemorrhous</i> <i>Cecropia glaziovii</i>          | 33.16 | -0.643 | high | Plant-skewed | 1 |
| <i>Cyanerpes cyaneus</i> <i>Xylopia sericea</i>               | 33.13 | -0.565 | high | Plant-skewed | 1 |
| <i>Carpornis cucullata</i> <i>Ocotea teleiandra</i>           | 33.03 | 0.099  | high | Bird-skewed  | 1 |
| <i>Tangara desmaresti</i> <i>Guatteria australis</i>          | 33.01 | -0.919 | high | Plant-skewed | 1 |
| <i>Pteroglossus bailloni</i> <i>Ficus glabra</i>              | 32.99 | -0.353 | high | Plant-skewed | 1 |
| <i>Pipile jacutinga</i> <i>Eugenia brasiliensis</i>           | 32.97 | 0.863  | high | Bird-skewed  | 1 |
| <i>Conirostrum speciosum</i> <i>Guettarda viburnoides</i>     | 32.94 | -0.476 | high | Plant-skewed | 1 |
| <i>Turdus sp</i> <i>Protium heptaphyllum</i>                  | 32.93 | -0.745 | high | Plant-skewed | 1 |
| <i>Dacnis cayana</i> <i>Clusia organensis</i>                 | 32.85 | -0.723 | high | Plant-skewed | 1 |
| <i>Pipile jacutinga</i> <i>Endlicheria paniculata</i>         | 32.83 | 0.867  | high | Bird-skewed  | 1 |
| <i>Euphonia violacea</i> <i>Myrsine coriacea</i>              | 32.82 | -0.453 | high | Plant-skewed | 1 |
| <i>Tangara mexicana</i> <i>Protium heptaphyllum</i>           | 32.81 | -0.750 | high | Plant-skewed | 1 |
| <i>Habia rubica</i> <i>Trichilia clauseni</i>                 | 32.80 | 0.116  | high | Bird-skewed  | 1 |
| <i>Coereba flaveola</i> <i>Xylopia sericea</i>                | 32.77 | -0.581 | high | Plant-skewed | 1 |
| <i>Turdus amaurochalinus</i> <i>Myrsine coriacea</i>          | 32.74 | -0.457 | low  | Plant-skewed | 4 |
| <i>Elaenia mesoleuca</i> <i>Symplocos glandulosomarginata</i> | 32.73 | -0.778 | low  | Plant-skewed | 1 |
| <i>Selenidera maculirostris</i> <i>Psychotria nuda</i>        | 32.71 | 0.612  | low  | Bird-skewed  | 1 |
| <i>Euphonia pectoralis</i> <i>Ficus sp</i>                    | 32.71 | -0.416 | low  | Plant-skewed | 1 |

|                                                          |       |        |     |              |   |
|----------------------------------------------------------|-------|--------|-----|--------------|---|
| <i>Pitangus sulphuratus Nectandra megapotamica</i>       | 32.70 | -0.373 | low | Plant-skewed | 1 |
| <i>Coryphospingus pileatus Protium icicariba</i>         | 32.69 | -0.767 | low | Plant-skewed | 1 |
| <i>Chiroxiphia caudate Symplocos glandulosomarginata</i> | 32.63 | -0.781 | low | Plant-skewed | 1 |
| <i>Pipile jacutinga Eugenia involucrata</i>              | 32.62 | 0.875  | low | Bird-skewed  | 1 |
| <i>Lipaugus lanioides Cupania vernalis</i>               | 32.60 | -0.561 | low | Plant-skewed | 1 |
| <i>Trogon viridis Paullinia sp</i>                       | 32.60 | 0.922  | low | Bird-skewed  | 1 |
| <i>Megarynchus pitangua Cupania vernalis</i>             | 32.59 | -0.562 | low | Plant-skewed | 1 |
| <i>Conirostrum speciosum Myrsine coriacea</i>            | 32.55 | -0.466 | low | Plant-skewed | 1 |
| <i>Myiarchus swainsoni Symplocos glandulosomarginata</i> | 32.54 | -0.784 | low | Plant-skewed | 1 |
| <i>Orchesticus abeillei Xylopia brasiliensis</i>         | 32.54 | -0.604 | low | Plant-skewed | 1 |
| <i>Pteroglossus bailloni Matayba elaeagnoides</i>        | 32.53 | -0.338 | low | Plant-skewed | 1 |
| <i>Saltator maximus Xylopia sericea</i>                  | 32.51 | -0.592 | low | Plant-skewed | 1 |
| <i>Pyroderus scutatus Nectandra membranacea</i>          | 32.49 | 0.397  | low | Bird-skewed  | 1 |
| <i>Elaenia sp Schinus terebinthifolia</i>                | 32.48 | -0.675 | low | Plant-skewed | 2 |
| <i>Turdus rufiventris Protium heptaphyllum</i>           | 32.47 | -0.762 | low | Plant-skewed | 2 |
| <i>Zonotrichia capensis Ficus organensis</i>             | 32.46 | -0.128 | low | Plant-skewed | 1 |
| <i>Elaenia flavogaster Cecropia pachystachya</i>         | 32.44 | -0.695 | low | Plant-skewed | 1 |
| <i>Coryphospingus cucullatus Protium heptaphyllum</i>    | 32.42 | -0.764 | low | Plant-skewed | 1 |
| <i>Chiroxiphia caudate Geonoma pauciflora</i>            | 32.42 | -0.780 | low | Plant-skewed | 1 |
| <i>Selenidera maculirostris Psychotria mapourioides</i>  | 32.41 | 0.625  | low | Bird-skewed  | 1 |
| <i>Ilicura militaris Myrsine venosa</i>                  | 32.27 | -0.207 | low | Plant-skewed | 1 |
| <i>Euphonia violacea Ficus sp</i>                        | 32.24 | -0.438 | low | Plant-skewed | 1 |
| <i>Myiodynastes maculatus Myrsine coriacea</i>           | 32.22 | -0.481 | low | Plant-skewed | 4 |
| <i>Turdus albicollis Schinus terebinthifolia</i>         | 32.09 | -0.691 | low | Plant-skewed | 1 |
| <i>Chiroxiphia caudate Protium heptaphyllum</i>          | 32.09 | -0.777 | low | Plant-skewed | 1 |
| <i>Orthogonys chloricterus Xylopia brasiliensis</i>      | 32.09 | -0.624 | low | Plant-skewed | 1 |

|                                                        |       |        |     |              |   |
|--------------------------------------------------------|-------|--------|-----|--------------|---|
| <i>Elaenia flavogaster Schinus terebinthifolia</i>     | 32.08 | -0.691 | low | Plant-skewed | 2 |
| <i>Trichothraupis melanops Cecropia pachystachya</i>   | 32.06 | -0.711 | low | Plant-skewed | 1 |
| <i>Cacicus haemorrhous Xylopia brasiliensis</i>        | 32.04 | -0.626 | low | Plant-skewed | 1 |
| <i>Turdus albicollis Cecropia glaziovii</i>            | 32.02 | -0.690 | low | Plant-skewed | 1 |
| <i>Thraupis sayaca Vitex polygama</i>                  | 32.01 | -0.905 | low | Plant-skewed | 1 |
| <i>Thraupis sayaca Vitex megapotamica</i>              | 32.01 | -0.905 | low | Plant-skewed | 1 |
| <i>Euphonia chalybea Ficus sp</i>                      | 32.00 | -0.450 | low | Plant-skewed | 1 |
| <i>Chiroxiphia caudate Symplocos estrellensis</i>      | 31.99 | -0.776 | low | Plant-skewed | 1 |
| <i>Saltator similis Protium heptaphyllum</i>           | 31.99 | -0.781 | low | Plant-skewed | 2 |
| <i>Dacnis cayana Cecropia pachystachya</i>             | 31.99 | -0.714 | low | Plant-skewed | 2 |
| <i>Penelope obscura Myrsine lancifolia</i>             | 31.98 | -0.382 | low | Plant-skewed | 1 |
| <i>Elaenia obscura Ilex brevicuspis</i>                | 31.97 | -0.314 | low | Plant-skewed | 1 |
| <i>Trogon sarrucura Clusia criuva</i>                  | 31.94 | 0.136  | low | Bird-skewed  | 1 |
| <i>Vireo olivaceus Myrcia ferruginea</i>               | 31.93 | 0.812  | low | Bird-skewed  | 1 |
| <i>Mionectes rufiventris Myrsine lancifolia</i>        | 31.88 | -0.388 | low | Plant-skewed | 1 |
| <i>Celeus flavescens Myrsine sp</i>                    | 31.87 | -0.300 | low | Plant-skewed | 1 |
| <i>Tangara desmaresti Gaylussacia brasiliensis</i>     | 31.85 | -0.916 | low | Plant-skewed | 1 |
| <i>Pitangus sulphuratus Ficus insipida</i>             | 31.84 | -0.345 | low | Plant-skewed | 1 |
| <i>Cacicus haemorrhous Xylopia sericea</i>             | 31.82 | -0.622 | low | Plant-skewed | 1 |
| <i>Tachyphonus coronatus Protium heptaphyllum</i>      | 31.79 | -0.788 | low | Plant-skewed | 1 |
| <i>Trichothraupis melanops Schinus terebinthifolia</i> | 31.70 | -0.707 | low | Plant-skewed | 1 |
| <i>Tachyphonus coronatus Symplocos pubescens</i>       | 31.68 | -0.787 | low | Plant-skewed | 1 |
| <i>Dacnis cayana Schinus terebinthifolia</i>           | 31.63 | -0.709 | low | Plant-skewed | 5 |
| <i>Trichothraupis melanops Cecropia glaziovii</i>      | 31.63 | -0.706 | low | Plant-skewed | 1 |
| <i>Trogon viridis Miconia cabucu</i>                   | 31.61 | 0.954  | low | Bird-skewed  | 1 |
| <i>Tolmomyias sulphurescens Ocotea notata</i>          | 31.61 | 0.039  | low | Bird-skewed  | 1 |
| <i>Carpornis cucullata Ixora gardneriana</i>           | 31.57 | 0.183  | low | Bird-skewed  | 1 |
| <i>Turdus fumigatus Protium heptaphyllum</i>           | 31.48 | -0.800 | low | Plant-skewed | 1 |
| <i>Myiarchus ferox Protium heptaphyllum</i>            | 31.47 | -0.801 | low | Plant-skewed | 1 |

|                                                          |       |        |     |              |   |
|----------------------------------------------------------|-------|--------|-----|--------------|---|
| <i>Turdus leucomelas Protium heptaphyllum</i>            | 31.46 | -0.801 | low | Plant-skewed | 2 |
| <i>Cissopis leverianus Schinus terebinthifolia</i>       | 31.42 | -0.718 | low | Plant-skewed | 1 |
| <i>Xolmis velatus Myrsine coriacea</i>                   | 31.40 | -0.520 | low | Plant-skewed | 1 |
| <i>Cacicus haemorrhous Cupania vernalis</i>              | 31.38 | -0.615 | low | Plant-skewed | 1 |
| <i>Tangara seledon Symplocos glandulosomarginata</i>     | 31.36 | -0.829 | low | Plant-skewed | 1 |
| <i>Cissopis leverianus Cecropia glaziovii</i>            | 31.35 | -0.717 | low | Plant-skewed | 1 |
| <i>Pitangus sulphuratus Myrsine sp</i>                   | 31.35 | -0.328 | low | Plant-skewed | 1 |
| <i>Ramphastos dicolorus Persea willdenovii</i>           | 31.29 | -0.541 | low | Plant-skewed | 1 |
| <i>Pipile jacutinga Marlierea reitzii</i>                | 31.27 | 0.921  | low | Bird-skewed  | 1 |
| <i>Tangara cayana Protium heptaphyllum</i>               | 31.26 | -0.809 | low | Plant-skewed | 2 |
| <i>Selenidera maculirostris Rudgea recurva</i>           | 31.22 | 0.676  | low | Bird-skewed  | 1 |
| <i>Selenidera maculirostris Rudgea jasminoides</i>       | 31.22 | 0.676  | low | Bird-skewed  | 1 |
| <i>Penelope obscura Ilex brevicuspis</i>                 | 31.18 | -0.356 | low | Plant-skewed | 1 |
| <i>Lipaugus lanioides Myrsine coriacea</i>               | 31.16 | -0.531 | low | Plant-skewed | 1 |
| <i>Megarynchus pitangua Myrsine coriacea</i>             | 31.15 | -0.532 | low | Plant-skewed | 1 |
| <i>Tityra cayana Allophylus edulis</i>                   | 31.13 | 0.341  | low | Bird-skewed  | 1 |
| <i>Manacus manacus Ocotea sp</i>                         | 31.11 | -0.179 | low | Plant-skewed | 1 |
| <i>Turdus rufiventris Cecropia pachystachya</i>          | 31.10 | -0.749 | low | Plant-skewed | 1 |
| <i>Schiffornis virescens Psychotria gracilentia</i>      | 31.09 | 0.754  | low | Bird-skewed  | 1 |
| <i>Tangara mexicana Schinus terebinthifolia</i>          | 31.08 | -0.732 | low | Plant-skewed | 1 |
| <i>Euphonia pectoralis Phoradendron sp</i>               | 31.07 | -0.365 | low | Plant-skewed | 1 |
| <i>Lathrotriccus euleri Myrsine coriacea</i>             | 31.07 | -0.536 | low | Plant-skewed | 1 |
| <i>Ramphastos dicolorus Myrsine coriacea</i>             | 31.06 | -0.536 | low | Plant-skewed | 1 |
| <i>Vireo olivaceus Miconia tristis</i>                   | 31.04 | 0.845  | low | Bird-skewed  | 1 |
| <i>Thraupis cyanoptera Symplocos glandulosomarginata</i> | 31.03 | -0.841 | low | Plant-skewed | 1 |
| <i>Tangara desmaresti Gaylussacia pulchra</i>            | 31.02 | -0.913 | low | Plant-skewed | 1 |
| <i>Tityra cayana Nectandra membranacea</i>               | 30.99 | 0.349  | low | Bird-skewed  | 1 |
| <i>Vireo olivaceus Miconia pusilliflora</i>              | 30.99 | 0.847  | low | Bird-skewed  | 1 |
| <i>Tangara peruviana Schinus terebinthifolia</i>         | 30.97 | -0.736 | low | Plant-skewed | 1 |

|                                                    |       |        |     |              |   |
|----------------------------------------------------|-------|--------|-----|--------------|---|
| <i>Celeus flavescens Myrsine umbellata</i>         | 30.97 | -0.265 | low | Plant-skewed | 1 |
| <i>Pipra pipra Xylopia sericea</i>                 | 30.94 | -0.660 | low | Plant-skewed | 1 |
| <i>Tolmomyias flaviventris Clusia hilariana</i>    | 30.92 | 0.082  | low | Bird-skewed  | 1 |
| <i>Stephanophorus diadematus Myrsine coriacea</i>  | 30.91 | -0.543 | low | Plant-skewed | 2 |
| <i>Turdus albicollis Xylopia brasiliensis</i>      | 30.90 | -0.675 | low | Plant-skewed | 1 |
| <i>Mionectes rufiventris Myrsine sp</i>            | 30.85 | -0.354 | low | Plant-skewed | 1 |
| <i>Myiodynastes maculatus Myrsine lancifolia</i>   | 30.78 | -0.443 | low | Plant-skewed | 1 |
| <i>Cranioleuca pallida Eugenia cerasiflora</i>     | 30.78 | 0.932  | low | Bird-skewed  | 1 |
| <i>Turdus flavipes Xylopia brasiliensis</i>        | 30.77 | -0.680 | low | Plant-skewed | 1 |
| <i>Turdus amaurochalinus Ficus insipida</i>        | 30.76 | -0.401 | low | Plant-skewed | 1 |
| <i>Turdus rufiventris Schinus terebinthifolia</i>  | 30.74 | -0.746 | low | Plant-skewed | 4 |
| <i>Selenidera maculirostris Amaioua intermedia</i> | 30.73 | 0.697  | low | Bird-skewed  | 1 |
| <i>Selenidera maculirostris Amaioua guianensis</i> | 30.73 | 0.697  | low | Bird-skewed  | 1 |
| <i>Chiroxiphia caudate Cecropia pachystachya</i>   | 30.72 | -0.765 | low | Plant-skewed | 1 |
| <i>Penelope obscura Ficus enormis</i>              | 30.71 | -0.340 | low | Plant-skewed | 1 |
| <i>Turdus rufiventris Cecropia glaziovii</i>       | 30.67 | -0.745 | low | Plant-skewed | 1 |
| <i>Saltator maximus Myrsine coriacea</i>           | 30.64 | -0.556 | low | Plant-skewed | 1 |
| <i>Pipile jacutinga Campomanesia xanthocarpa</i>   | 30.63 | 0.943  | low | Bird-skewed  | 1 |
| <i>Schiffornis virescens Miconia valtheri</i>      | 30.61 | 0.773  | low | Bird-skewed  | 1 |
| <i>Lipaugus lanioides Ficus sp</i>                 | 30.59 | -0.518 | low | Plant-skewed | 1 |
| <i>Myiodynastes maculatus Matayba guianensis</i>   | 30.58 | -0.437 | low | Plant-skewed | 1 |
| <i>Thraupis cyanoptera Protium heptaphyllum</i>    | 30.50 | -0.838 | low | Plant-skewed | 1 |
| <i>Turdus amaurochalinus Ilex brevicuspis</i>      | 30.49 | -0.392 | low | Plant-skewed | 1 |
| <i>Pitangus sulphuratus Myrsine umbellata</i>      | 30.45 | -0.294 | low | Plant-skewed | 1 |
| <i>Orchesticus abeillei Myrsine coriacea</i>       | 30.44 | -0.565 | low | Plant-skewed | 1 |
| <i>Tachyphonus coronatus Cecropia pachystachya</i> | 30.42 | -0.777 | low | Plant-skewed | 2 |
| <i>Procnias nudicollis Nectandra membranacea</i>   | 30.37 | 0.326  | low | Bird-skewed  | 2 |
| <i>Pipile jacutinga Miconia cabucu</i>             | 30.37 | 0.952  | low | Bird-skewed  | 1 |
| <i>Chiroxiphia caudate Schinus terebinthifolia</i> | 30.36 | -0.761 | low | Plant-skewed | 1 |
| <i>Turdus albicollis Xylopia langsdorfiana</i>     | 30.35 | -0.667 | low | Plant-skewed | 1 |
| <i>Chiroxiphia caudate Cecropia glaziovii</i>      | 30.29 | -0.760 | low | Plant-skewed | 2 |

|                                                           |       |        |     |              |   |
|-----------------------------------------------------------|-------|--------|-----|--------------|---|
| <i>Myiozetetes similis Persea willdenovii</i>             | 30.29 | -0.587 | low | Plant-skewed | 1 |
| <i>Saltator similis Schinus terebinthifolia</i>           | 30.26 | -0.765 | low | Plant-skewed | 1 |
| <i>Chiroxiphia caudate Pereskia aculeata</i>              | 30.26 | -0.760 | low | Plant-skewed | 1 |
| <i>Turdus albicollis Cupania vernalis</i>                 | 30.24 | -0.665 | low | Plant-skewed | 1 |
| <i>Dacnis cayana Xylopia sericea</i>                      | 30.21 | -0.692 | low | Plant-skewed | 1 |
| <i>Penelope obscura Myrsine venosa</i>                    | 30.21 | -0.321 | low | Plant-skewed | 1 |
| <i>Pachyramphus castaneus Clusia criuva</i>               | 30.17 | 0.037  | low | Bird-skewed  | 1 |
| <i>Saltator similis Pereskia aculeata</i>                 | 30.15 | -0.764 | low | Plant-skewed | 1 |
| <i>Tangara cyanocephala Symplocos glandulosomarginata</i> | 30.14 | -0.874 | low | Plant-skewed | 1 |
| <i>Coryphospingus pileatus Pilosocereus arrabidae</i>     | 30.13 | -0.742 | low | Plant-skewed | 1 |
| <i>Turdus flavipes Cupania vernalis</i>                   | 30.11 | -0.671 | low | Plant-skewed | 1 |
| <i>Euphonia violacea Ficus enormis</i>                    | 30.10 | -0.373 | low | Plant-skewed | 1 |
| <i>Turdus leucomelas Cecropia pachystachya</i>            | 30.09 | -0.790 | low | Plant-skewed | 4 |
| <i>Tachyphonus coronatus Schinus terebinthifolia</i>      | 30.06 | -0.773 | low | Plant-skewed | 3 |
| <i>Myiozetetes similis Myrsine coriacea</i>               | 30.06 | -0.583 | low | Plant-skewed | 3 |
| <i>Hemithraupis ruficapilla Cecropia glaziovii</i>        | 30.05 | -0.770 | low | Plant-skewed | 1 |
| <i>Lipaugus lanioides Nectandra megapotamica</i>          | 30.04 | -0.505 | low | Plant-skewed | 1 |
| <i>Thraupis ornate Symplocos glandulosomarginata</i>      | 30.03 | -0.878 | low | Plant-skewed | 1 |
| <i>Tachyphonus coronatus Cecropia glaziovii</i>           | 29.99 | -0.773 | low | Plant-skewed | 2 |
| <i>Penelope superciliaris Ocotea corymbosa</i>            | 29.97 | -0.269 | low | Plant-skewed | 1 |
| <i>Tachyphonus coronatus Pereskia aculeata</i>            | 29.96 | -0.772 | low | Plant-skewed | 1 |
| <i>Mionectes rufiventris Myrsine umbellata</i>            | 29.95 | -0.322 | low | Plant-skewed | 1 |
| <i>Pitangus sulphuratus Ficus organensis</i>              | 29.94 | -0.273 | low | Plant-skewed | 1 |
| <i>Cacicus haemorrhous Myrsine coriacea</i>               | 29.94 | -0.589 | low | Plant-skewed | 2 |
| <i>Cacicus chrysopterus Myrsine coriacea</i>              | 29.94 | -0.589 | low | Plant-skewed | 3 |
| <i>Zonotrichia capensis Clusia criuva</i>                 | 29.92 | 0.021  | low | Bird-skewed  | 1 |
| <i>Zonotrichia capensis Clusia hilariana</i>              | 29.92 | 0.021  | low | Bird-skewed  | 1 |
| <i>Pitangus sulphuratus Ocotea corymbosa</i>              | 29.91 | -0.272 | low | Plant-skewed | 1 |

|                                                     |       |        |     |              |   |
|-----------------------------------------------------|-------|--------|-----|--------------|---|
| <i>Euphonia pectoralis Myrsine umbellata</i>        | 29.91 | -0.324 | low | Plant-skewed | 1 |
| <i>Carpornis cucullata Ocotea odorifera</i>         | 29.89 | 0.280  | low | Bird-skewed  | 1 |
| <i>Tangara cayana Cecropia pachystachya</i>         | 29.89 | -0.798 | low | Plant-skewed | 1 |
| <i>Euphonia chalybea Ficus enormis</i>              | 29.85 | -0.386 | low | Plant-skewed | 1 |
| <i>Habia rubica Allophylus edulis</i>               | 29.78 | 0.290  | low | Bird-skewed  | 1 |
| <i>Empidonomus varius Myrsine coriacea</i>          | 29.77 | -0.597 | low | Plant-skewed | 1 |
| <i>Myiodynastes maculatus Myrsine sp</i>            | 29.75 | -0.413 | low | Plant-skewed | 1 |
| <i>Myiarchus ferox Schinus terebinthifolia</i>      | 29.74 | -0.787 | low | Plant-skewed | 1 |
| <i>Turdus leucomelas Schinus terebinthifolia</i>    | 29.73 | -0.787 | low | Plant-skewed | 3 |
| <i>Lipaugus lanioides Myrsine lancifolia</i>        | 29.72 | -0.497 | low | Plant-skewed | 1 |
| <i>Tyrannus melancholicus Cecropia pachystachya</i> | 29.71 | -0.805 | low | Plant-skewed | 1 |
| <i>Pitangus sulphuratus Ocotea sp</i>               | 29.68 | -0.262 | low | Plant-skewed | 1 |
| <i>Ramphocelus bresilius Cecropia pachystachya</i>  | 29.63 | -0.809 | low | Plant-skewed | 1 |
| <i>Ramphocelus carbo Cecropia pachystachya</i>      | 29.63 | -0.809 | low | Plant-skewed | 3 |
| <i>Vireo olivaceus Myrcia splendens</i>             | 29.58 | 0.899  | low | Bird-skewed  | 1 |
| <i>Turdus amaurochalinus Myrsine parvifolia</i>     | 29.57 | -0.361 | low | Plant-skewed | 1 |
| <i>Tangara cayana Schinus terebinthifolia</i>       | 29.53 | -0.795 | low | Plant-skewed | 4 |
| <i>Colaptes campestris Myrsine coriacea</i>         | 29.53 | -0.608 | low | Plant-skewed | 1 |
| <i>Colaptes melanochloros Myrsine coriacea</i>      | 29.53 | -0.608 | low | Plant-skewed | 2 |
| <i>Euphonia violacea Phoradendron piperoides</i>    | 29.53 | -0.353 | low | Plant-skewed | 1 |
| <i>Trogon surrucura Allophylus edulis</i>           | 29.50 | 0.278  | low | Bird-skewed  | 1 |
| <i>Thraupis ornate Protium heptaphyllum</i>         | 29.50 | -0.876 | low | Plant-skewed | 1 |
| <i>Pitangus sulphuratus Cestrum mariquitense</i>    | 29.49 | -0.254 | low | Plant-skewed | 1 |
| <i>Tangara cayana Cecropia glaziovii</i>            | 29.46 | -0.794 | low | Plant-skewed | 1 |
| <i>Thraupis palmarum Protium heptaphyllum</i>       | 29.45 | -0.877 | low | Plant-skewed | 1 |
| <i>Euphonia violacea Myrsine umbellata</i>          | 29.45 | -0.350 | low | Plant-skewed | 1 |
| <i>Orthogonys chloricterus Ficus sp</i>             | 29.41 | -0.575 | low | Plant-skewed | 1 |
| <i>Ramphastos vitellinus Matayba elaeagnoides</i>   | 29.40 | -0.497 | low | Plant-skewed | 1 |
| <i>Turdus amaurochalinus Myrsine umbellata</i>      | 29.37 | -0.354 | low | Plant-skewed | 2 |
| <i>Cacicus haemorrhous Ficus sp</i>                 | 29.37 | -0.577 | low | Plant-skewed | 1 |
| <i>Schiffornis virescens Miconia latecrenata</i>    | 29.36 | 0.823  | low | Bird-skewed  | 1 |



|                                                         |       |        |     |              |   |
|---------------------------------------------------------|-------|--------|-----|--------------|---|
| <i>Tyrannus melancholicus Schinus terebinthifolia</i>   | 29.35 | -0.802 | low | Plant-skewed | 1 |
| <i>Schiffornis virescens Miconia discolor</i>           | 29.32 | 0.825  | low | Bird-skewed  | 1 |
| <i>Ramphocelus bresilius Schinus terebinthifolia</i>    | 29.27 | -0.806 | low | Plant-skewed | 1 |
| <i>Ramphocelus carbo Schinus terebinthifolia</i>        | 29.27 | -0.806 | low | Plant-skewed | 1 |
| <i>Tangara desmaresti Symplocos glandulosomarginata</i> | 29.25 | -0.908 | low | Plant-skewed | 1 |
| <i>Ramphocelus bresilius Cecropia glaziovii</i>         | 29.20 | -0.805 | low | Plant-skewed | 1 |
| <i>Elaenia sp Myrsine coriacea</i>                      | 29.19 | -0.624 | low | Plant-skewed | 2 |
| <i>Schiffornis virescens Miconia racemifera</i>         | 29.17 | 0.831  | low | Bird-skewed  | 1 |
| <i>Schiffornis virescens Leandra acutiflora</i>         | 29.17 | 0.831  | low | Bird-skewed  | 1 |
| <i>Schiffornis virescens Miconia tristis</i>            | 29.12 | 0.833  | low | Bird-skewed  | 1 |
| <i>Tangara seledon Schinus terebinthifolia</i>          | 29.10 | -0.813 | low | Plant-skewed | 1 |
| <i>Pyroderus scutatus Psychotria mapourioides</i>       | 29.10 | 0.564  | low | Bird-skewed  | 1 |
| <i>Attila phoenicurus Myrsine umbellata</i>             | 29.09 | -0.370 | low | Plant-skewed | 1 |
| <i>Schiffornis virescens Miconia pusilliflora</i>       | 29.07 | 0.835  | low | Bird-skewed  | 1 |
| <i>Pipra rubrocapilla Myrsine coriacea</i>              | 29.06 | -0.630 | low | Plant-skewed | 1 |
| <i>Pipra pipra Myrsine coriacea</i>                     | 29.06 | -0.630 | low | Plant-skewed | 1 |
| <i>Selenidera maculirostris Myrcia spectabilis</i>      | 29.05 | 0.767  | low | Bird-skewed  | 2 |
| <i>Euphonia violacea Ficus hirsuta</i>                  | 29.03 | -0.334 | low | Plant-skewed | 1 |
| <i>Tangara seledon Cecropia glaziovii</i>               | 29.03 | -0.812 | low | Plant-skewed | 1 |
| <i>Turdus albicollis Persea willdenovii</i>             | 29.03 | -0.646 | low | Plant-skewed | 1 |
| <i>Thraupis sayaca Protium heptaphyllum</i>             | 29.02 | -0.894 | low | Plant-skewed | 2 |
| <i>Schiffornis virescens Leandra variabilis</i>         | 28.99 | 0.838  | low | Bird-skewed  | 1 |
| <i>Laniisoma elegans Miconia pusilliflora</i>           | 28.98 | 0.834  | low | Bird-skewed  | 1 |
| <i>Schiffornis virescens Leandra laevigata</i>          | 28.92 | 0.841  | low | Bird-skewed  | 1 |
| <i>Turdus rufiventris Cupania vernalis</i>              | 28.89 | -0.725 | low | Plant-skewed | 1 |
| <i>Selenidera maculirostris Myrcia pulchra</i>          | 28.87 | 0.775  | low | Bird-skewed  | 1 |
| <i>Turdus amaurochalinus Ficus organensis</i>           | 28.86 | -0.335 | low | Plant-skewed | 1 |
| <i>Myiodynastes maculatus Myrsine umbellata</i>         | 28.85 | -0.383 | low | Plant-skewed | 2 |
| <i>Manacus manacus Ixora venulosa</i>                   | 28.84 | -0.053 | low | Plant-skewed | 1 |
| <i>Euphonia sp Phoradendron sp</i>                      | 28.82 | -0.484 | low | Plant-skewed | 1 |

|                                                                  |       |        |     |              |   |
|------------------------------------------------------------------|-------|--------|-----|--------------|---|
| <i>Turdus albicollis</i> <i>Myrsine coriacea</i>                 | 28.80 | -0.642 | low | Plant-skewed | 3 |
| <i>Carpornis cucullata</i> <i>Psittacanthus sp</i>               | 28.80 | 0.343  | low | Bird-skewed  | 1 |
| <i>Elaenia flavogaster</i> <i>Myrsine coriacea</i>               | 28.79 | -0.643 | low | Plant-skewed | 2 |
| <i>Thraupis cyanoptera</i> <i>Schinus terebinthifolia</i>        | 28.77 | -0.826 | low | Plant-skewed | 1 |
| <i>Selenidera maculirostris</i> <i>Myrcia pubipetala</i>         | 28.74 | 0.781  | low | Bird-skewed  | 1 |
| <i>Pitangus sulphuratus</i> <i>Inga laurina</i>                  | 28.73 | -0.219 | low | Plant-skewed | 1 |
| <i>Schiffornis virescens</i> <i>Leandra pilonensis</i>           | 28.72 | 0.849  | low | Bird-skewed  | 1 |
| <i>Mionectes rufiventris</i> <i>Myrsine gardneriana</i>          | 28.71 | -0.271 | low | Plant-skewed | 1 |
| <i>Thraupis cyanoptera</i> <i>Cecropia glaziovii</i>             | 28.70 | -0.826 | low | Plant-skewed | 1 |
| <i>Schiffornis virescens</i> <i>Ossaea amygdaloides</i>          | 28.68 | 0.850  | low | Bird-skewed  | 1 |
| <i>Turdus flavipes</i> <i>Myrsine coriacea</i>                   | 28.67 | -0.649 | low | Plant-skewed | 1 |
| <i>Stephanophorus diadematus</i> <i>Ilex brevicuspis</i>         | 28.66 | -0.489 | low | Plant-skewed | 2 |
| <i>Tachyphonus coronatus</i> <i>Xylopi sericea</i>               | 28.65 | -0.759 | low | Plant-skewed | 1 |
| <i>Selenidera maculirostris</i> <i>Ficus luschnathiana</i>       | 28.63 | 0.785  | low | Bird-skewed  | 1 |
| <i>Schistochlamys ruficapillus</i> <i>Cecropia glaziovii</i>     | 28.62 | -0.829 | low | Plant-skewed | 1 |
| <i>Elaenia mesoleuca</i> <i>Cupania vernalis</i>                 | 28.61 | -0.737 | low | Plant-skewed | 1 |
| <i>Turdus amaurochalinus</i> <i>Ocotea sp</i>                    | 28.61 | -0.325 | low | Plant-skewed | 1 |
| <i>Nemosia pileata</i> <i>Ocotea notata</i>                      | 28.56 | -0.156 | low | Plant-skewed | 1 |
| <i>Orthogonys chloricterus</i> <i>Myrsine lancifolia</i>         | 28.54 | -0.556 | low | Plant-skewed | 1 |
| <i>Hemithraupis flavicollis</i> <i>Xylopi sericea</i>            | 28.53 | -0.765 | low | Plant-skewed | 1 |
| <i>Chiroxiphia caudate</i> <i>Cupania vernalis</i>               | 28.51 | -0.742 | low | Plant-skewed | 1 |
| <i>Cacicus haemorrhous</i> <i>Myrsine lancifolia</i>             | 28.49 | -0.559 | low | Plant-skewed | 1 |
| <i>Lipaugus lanioides</i> <i>Ocotea dispersa</i>                 | 28.47 | -0.463 | low | Plant-skewed | 1 |
| <i>Stephanophorus diadematus</i> <i>Myrsine sp</i>               | 28.44 | -0.483 | low | Plant-skewed | 1 |
| <i>Lipaugus lanioides</i> <i>Ficus enormis</i>                   | 28.44 | -0.462 | low | Plant-skewed | 1 |
| <i>Trichothraupis melanops</i> <i>Coccocypselum geophiloides</i> | 28.39 | -0.661 | low | Plant-skewed | 1 |
| <i>Ramphastos dicolorus</i> <i>Ficus enormis</i>                 | 28.34 | -0.468 | low | Plant-skewed | 1 |
| <i>Dacnis cayana</i> <i>Myrsine coriacea</i>                     | 28.34 | -0.664 | low | Plant-skewed | 3 |
| <i>Myiarchus ferox</i> <i>Xylopi sericea</i>                     | 28.32 | -0.773 | low | Plant-skewed | 1 |
| <i>Empidonomus varius</i> <i>Myrsine lancifolia</i>              | 28.32 | -0.567 | low | Plant-skewed | 1 |

|                                                      |       |        |     |              |   |
|------------------------------------------------------|-------|--------|-----|--------------|---|
| <i>Hemithraupis ruficapilla Cupania vernalis</i>     | 28.27 | -0.752 | low | Plant-skewed | 1 |
| <i>Turdus albicollis Ficus sp</i>                    | 28.23 | -0.633 | low | Plant-skewed | 1 |
| <i>Tachyphonus coronatus Cupania vernalis</i>        | 28.21 | -0.755 | low | Plant-skewed | 1 |
| <i>Chiroxiphia caudate Mollinedia boracensis</i>     | 28.20 | -0.738 | low | Plant-skewed | 1 |
| <i>Tangara desmaresti Clusia organensis</i>          | 28.20 | -0.904 | low | Plant-skewed | 1 |
| <i>Vireo olivaceus Miconia cinnamomifolia</i>        | 28.18 | 0.951  | low | Bird-skewed  | 1 |
| <i>Tyrannus melancholicus Xylopia brasiliensis</i>   | 28.16 | -0.792 | low | Plant-skewed | 1 |
| <i>Cissopis leverianus Myrsine coriacea</i>          | 28.13 | -0.674 | low | Plant-skewed | 1 |
| <i>Turdus flavipes Ficus sp</i>                      | 28.10 | -0.639 | low | Plant-skewed | 1 |
| <i>Thraupis palmarum Cecropia pachystachya</i>       | 28.08 | -0.871 | low | Plant-skewed | 3 |
| <i>Elaenia parvirostris Myrsine coriacea</i>         | 28.08 | -0.677 | low | Plant-skewed | 1 |
| <i>Euphonia chlorotica Phoradendron piperoides</i>   | 28.05 | -0.436 | low | Plant-skewed | 1 |
| <i>Pitangus sulphuratus Trichilia clauseni</i>       | 27.99 | -0.181 | low | Plant-skewed | 1 |
| <i>Celeus flavescens Clusia criuva</i>               | 27.93 | -0.113 | low | Plant-skewed | 2 |
| <i>Cyanerpes cyaneus Myrsine umbellata</i>           | 27.88 | -0.437 | low | Plant-skewed | 1 |
| <i>Tangara cyanocephala Schinus terebinthifolia</i>  | 27.88 | -0.863 | low | Plant-skewed | 3 |
| <i>Ramphocelus bresilius Xylopia sericea</i>         | 27.85 | -0.794 | low | Plant-skewed | 1 |
| <i>Ramphastos dicolorus Myrsine venosa</i>           | 27.84 | -0.453 | low | Plant-skewed | 1 |
| <i>Selenidera maculirostris Miconia budlejoides</i>  | 27.84 | 0.819  | low | Bird-skewed  | 1 |
| <i>Attila rufus Myrsine gardneriana</i>              | 27.84 | -0.323 | low | Plant-skewed | 1 |
| <i>Tangara cyanocephala Cecropia glaziovii</i>       | 27.80 | -0.862 | low | Plant-skewed | 1 |
| <i>Selenidera maculirostris Miconia racemifera</i>   | 27.80 | 0.821  | low | Bird-skewed  | 1 |
| <i>Thraupis ornate Schinus terebinthifolia</i>       | 27.77 | -0.867 | low | Plant-skewed | 1 |
| <i>Dacnis cayana Ficus sp</i>                        | 27.76 | -0.655 | low | Plant-skewed | 1 |
| <i>Thraupis palmarum Schinus terebinthifolia</i>     | 27.73 | -0.869 | low | Plant-skewed | 2 |
| <i>Pipraeidea melanonota Cestrum schlechtendalii</i> | 27.71 | -0.341 | low | Plant-skewed | 1 |
| <i>Thraupis ornate Cecropia glaziovii</i>            | 27.70 | -0.867 | low | Plant-skewed | 1 |
| <i>Lathrotriccus euleri Myrsine umbellata</i>        | 27.69 | -0.448 | low | Plant-skewed | 1 |
| <i>Ramphastos dicolorus Myrsine umbellata</i>        | 27.69 | -0.448 | low | Plant-skewed | 1 |
| <i>Cacicus chrysopterus Ilex brevicuspis</i>         | 27.69 | -0.540 | low | Plant-skewed | 1 |

|                                                      |       |        |     |              |   |
|------------------------------------------------------|-------|--------|-----|--------------|---|
| <i>Turdus rufiventris Persea willdenovii</i>         | 27.67 | -0.709 | low | Plant-skewed | 1 |
| <i>Schiffornis virescens Myrcia splendens</i>        | 27.66 | 0.891  | low | Bird-skewed  | 1 |
| <i>Thraupis sayaca Cecropia pachystachya</i>         | 27.65 | -0.888 | low | Plant-skewed | 2 |
| <i>Thraupis episcopus Cecropia pachystachya</i>      | 27.64 | -0.889 | low | Plant-skewed | 3 |
| <i>Thraupis cyanoptera Xylopia brasiliensis</i>      | 27.58 | -0.817 | low | Plant-skewed | 1 |
| <i>Turdus leucomelas Mollinedia boracensis</i>       | 27.57 | -0.766 | low | Plant-skewed | 1 |
| <i>Stephanophorus diadematus Myrsine umbellata</i>   | 27.54 | -0.457 | low | Plant-skewed | 1 |
| <i>Carpornis cucullata Ilex microdonta</i>           | 27.45 | 0.420  | low | Bird-skewed  | 1 |
| <i>Turdus rufiventris Myrsine coriacea</i>           | 27.45 | -0.706 | low | Plant-skewed | 3 |
| <i>Pitangus sulphuratus Clusia criuva</i>            | 27.41 | -0.149 | low | Plant-skewed | 1 |
| <i>Hylophilus poicilotis Struthanthus concinnus</i>  | 27.40 | 0.216  | low | Bird-skewed  | 1 |
| <i>Saltator similis Guettarda viburnoides</i>        | 27.37 | -0.734 | low | Plant-skewed | 1 |
| <i>Pachyramphus castaneus Struthanthus martianus</i> | 27.35 | 0.220  | low | Bird-skewed  | 1 |
| <i>Selenidera maculirostris Eugenia handroi</i>      | 27.29 | 0.842  | low | Bird-skewed  | 1 |
| <i>Thraupis sayaca Schinus terebinthifolia</i>       | 27.29 | -0.887 | low | Plant-skewed | 4 |
| <i>Thraupis episcopus Schinus terebinthifolia</i>    | 27.28 | -0.887 | low | Plant-skewed | 3 |
| <i>Saltator maximus Myrsine umbellata</i>            | 27.26 | -0.472 | low | Plant-skewed | 1 |
| <i>Tangara seledon Cupania vernalis</i>              | 27.24 | -0.797 | low | Plant-skewed | 1 |
| <i>Selenidera maculirostris Eugenia oblongata</i>    | 27.23 | 0.845  | low | Bird-skewed  | 1 |
| <i>Turdus flavipes Myrsine lancifolia</i>            | 27.23 | -0.623 | low | Plant-skewed | 1 |
| <i>Thraupis sayaca Cecropia glaziovii</i>            | 27.22 | -0.886 | low | Plant-skewed | 4 |
| <i>Elaenia mesoleuca Myrsine coriacea</i>            | 27.17 | -0.719 | low | Plant-skewed | 2 |
| <i>Selenidera maculirostris Eugenia expansa</i>      | 27.15 | 0.848  | low | Bird-skewed  | 1 |
| <i>Chiroxiphia caudate Myrsine coriacea</i>          | 27.07 | -0.724 | low | Plant-skewed | 1 |
| <i>Colaptes campestris Myrsine sp</i>                | 27.06 | -0.556 | low | Plant-skewed | 1 |
| <i>Turdus amaurochalinus Ocotea notata</i>           | 27.01 | -0.256 | low | Plant-skewed | 1 |
| <i>Myiarchus swainsoni Myrsine coriacea</i>          | 26.99 | -0.728 | low | Plant-skewed | 2 |
| <i>Saltator similis Myrsine coriacea</i>             | 26.97 | -0.729 | low | Plant-skewed | 1 |
| <i>Turdus amaurochalinus Trichilia clauseni</i>      | 26.92 | -0.251 | low | Plant-skewed | 1 |

|                                                         |       |        |     |              |   |
|---------------------------------------------------------|-------|--------|-----|--------------|---|
| <i>Thraupis cyanoptera Cupania vernalis</i>             | 26.92 | -0.812 | low | Plant-skewed | 1 |
| <i>Tangara desmaresti Cecropia glaziovii</i>            | 26.91 | -0.899 | low | Plant-skewed | 1 |
| <i>Tangara cyanoventris Cecropia glaziovii</i>          | 26.90 | -0.899 | low | Plant-skewed | 1 |
| <i>Dacnis cayana Myrsine lancifolia</i>                 | 26.89 | -0.640 | low | Plant-skewed | 1 |
| <i>Tachyphonus coronatus Myrsine coriacea</i>           | 26.77 | -0.738 | low | Plant-skewed | 2 |
| <i>Conirostrum speciosum Trichilia clauseni</i>         | 26.72 | -0.264 | low | Plant-skewed | 1 |
| <i>Selenidera maculirostris Psidium cattleianum</i>     | 26.69 | 0.868  | low | Bird-skewed  | 1 |
| <i>Selenidera maculirostris Siphoneugena densiflora</i> | 26.69 | 0.868  | low | Bird-skewed  | 1 |
| <i>Myiozetetes similis Myrsine umbellata</i>            | 26.69 | -0.504 | low | Plant-skewed | 3 |
| <i>Turdus leucomelas Persea willdenovii</i>             | 26.66 | -0.756 | low | Plant-skewed | 1 |
| <i>Tangara cayana Guettarda viburnoides</i>             | 26.64 | -0.768 | low | Plant-skewed | 1 |
| <i>Turdus albicollis Ilex brevicuspis</i>               | 26.55 | -0.600 | low | Plant-skewed | 1 |
| <i>Chiroxiphia caudate Ficus sp</i>                     | 26.50 | -0.716 | low | Plant-skewed | 1 |
| <i>Carpornis cucullata Psychotria vellosiana</i>        | 26.49 | 0.476  | low | Bird-skewed  | 1 |
| <i>Tyrannus melancholicus Persea major</i>              | 26.47 | -0.776 | low | Plant-skewed | 1 |
| <i>Myiarchus ferox Myrsine coriacea</i>                 | 26.45 | -0.753 | low | Plant-skewed | 1 |
| <i>Turdus leucomelas Myrsine coriacea</i>               | 26.44 | -0.754 | low | Plant-skewed | 3 |
| <i>Turdus flavipes Ilex brevicuspis</i>                 | 26.42 | -0.607 | low | Plant-skewed | 1 |
| <i>Myiodynastes maculatus Trichilia clauseni</i>        | 26.40 | -0.285 | low | Plant-skewed | 1 |
| <i>Empidonomus varius Myrsine umbellata</i>             | 26.40 | -0.521 | low | Plant-skewed | 1 |
| <i>Turdus amaurochalinus Ixora venulosa</i>             | 26.33 | -0.222 | low | Plant-skewed | 1 |
| <i>Turdus amaurochalinus Clusia criuva</i>              | 26.33 | -0.222 | low | Plant-skewed | 1 |
| <i>Carpornis melanocephala Psychotria suterella</i>     | 26.33 | 0.485  | low | Bird-skewed  | 2 |
| <i>Ilicura militaris Struthanthus concinnus</i>         | 26.32 | 0.157  | low | Bird-skewed  | 1 |
| <i>Thraupis palmarum Xylopia sericea</i>                | 26.31 | -0.861 | low | Plant-skewed | 1 |
| <i>Stephanophorus diadematus Myrsine gardneriana</i>    | 26.30 | -0.416 | low | Plant-skewed | 1 |
| <i>Selenidera maculirostris Myrcia splendens</i>        | 26.28 | 0.885  | low | Bird-skewed  | 1 |
| <i>Tyrannus melancholicus Persea willdenovii</i>        | 26.28 | -0.774 | low | Plant-skewed | 1 |
| <i>Tangara cayana Myrsine coriacea</i>                  | 26.24 | -0.763 | low | Plant-skewed | 3 |

|                                                     |       |        |     |              |   |
|-----------------------------------------------------|-------|--------|-----|--------------|---|
| <i>Euphonia pectoralis Ixora burchelliana</i>       | 26.22 | -0.148 | low | Plant-skewed | 1 |
| <i>Pteroglossus aracari Inga edulis</i>             | 26.20 | -0.375 | low | Plant-skewed | 1 |
| <i>Tangara preciosa Myrsine coriacea</i>            | 26.19 | -0.765 | low | Plant-skewed | 2 |
| <i>Antilophia galeata Cestrum mariquitense</i>      | 26.09 | -0.455 | low | Plant-skewed | 1 |
| <i>Trogon surrucura Psychotria suterella</i>        | 26.08 | 0.478  | low | Bird-skewed  | 1 |
| <i>Tyrannus savana Myrsine coriacea</i>             | 26.06 | -0.772 | low | Plant-skewed | 1 |
| <i>Tyrannus melancholicus Myrsine coriacea</i>      | 26.06 | -0.772 | low | Plant-skewed | 4 |
| <i>Tangara cyanocephala Cupania vernalis</i>        | 26.02 | -0.851 | low | Plant-skewed | 1 |
| <i>Turdus rufiventris Myrsine lancifolia</i>        | 26.00 | -0.685 | low | Plant-skewed | 1 |
| <i>Ramphocelus bresilius Myrsine coriacea</i>       | 25.98 | -0.776 | low | Plant-skewed | 1 |
| <i>Ramphocelus carbo Myrsine coriacea</i>           | 25.98 | -0.776 | low | Plant-skewed | 1 |
| <i>Ramphastos vitellinus Inga edulis</i>            | 25.96 | -0.390 | low | Plant-skewed | 1 |
| <i>Thraupis sayaca Xylopia sericea</i>              | 25.87 | -0.880 | low | Plant-skewed | 1 |
| <i>Dacnis nigripes Myrsine sp</i>                   | 25.87 | -0.620 | low | Plant-skewed | 1 |
| <i>Elaenia sp Myrsine umbellata</i>                 | 25.82 | -0.553 | low | Plant-skewed | 1 |
| <i>Myiodynastes maculatus Clusia criuva</i>         | 25.81 | -0.256 | low | Plant-skewed | 1 |
| <i>Tangara seledon Myrsine coriacea</i>             | 25.81 | -0.784 | low | Plant-skewed | 2 |
| <i>Turdus rufiventris Matayba guianensis</i>        | 25.80 | -0.681 | low | Plant-skewed | 1 |
| <i>Euphonia violacea Ixora burchelliana</i>         | 25.76 | -0.181 | low | Plant-skewed | 1 |
| <i>Selenidera maculirostris Myrcia brasiliensis</i> | 25.76 | 0.907  | low | Bird-skewed  | 1 |
| <i>Thraupis bonariensis Ficus organensis</i>        | 25.74 | -0.516 | low | Plant-skewed | 1 |
| <i>Tangara cyanocephala Mollinedia boracensis</i>   | 25.72 | -0.849 | low | Plant-skewed | 1 |
| <i>Cacicus haemorrhous Ocotea bicolor</i>           | 25.71 | -0.486 | low | Plant-skewed | 1 |
| <i>Chiroxiphia caudate Myrsine lancifolia</i>       | 25.62 | -0.704 | low | Plant-skewed | 1 |
| <i>Selenidera maculirostris Ocotea spixiana</i>     | 25.62 | 0.913  | low | Bird-skewed  | 1 |
| <i>Elaenia flavogaster Myrsine parvifolia</i>       | 25.62 | -0.580 | low | Plant-skewed | 1 |
| <i>Myiarchus swainsoni Myrsine lancifolia</i>       | 25.54 | -0.708 | low | Plant-skewed | 1 |
| <i>Cyanerpes cyaneus Ocotea notata</i>              | 25.53 | -0.352 | low | Plant-skewed | 1 |
| <i>Saltator similis Myrsine lancifolia</i>          | 25.52 | -0.709 | low | Plant-skewed | 1 |
| <i>Thraupis cyanopectera Myrsine coriacea</i>       | 25.48 | -0.799 | low | Plant-skewed | 1 |
| <i>Legatus leucophaeus Guarea guidonia</i>          | 25.47 | 0.414  | low | Bird-skewed  | 1 |

|                                                        |       |        |     |              |   |
|--------------------------------------------------------|-------|--------|-----|--------------|---|
| <i>Turdus albicollis Aiouea saligna</i>                | 25.46 | -0.576 | low | Plant-skewed | 1 |
| <i>Turdus albicollis Myrsine umbellata</i>             | 25.43 | -0.575 | low | Plant-skewed | 2 |
| <i>Elaenia flavogaster Myrsine umbellata</i>           | 25.42 | -0.575 | low | Plant-skewed | 1 |
| <i>Hemithraupis ruficapilla Myrsine lancifolia</i>     | 25.38 | -0.716 | low | Plant-skewed | 1 |
| <i>Tangara cyanoptera Ficus enormis</i>                | 25.36 | -0.629 | low | Plant-skewed | 1 |
| <i>Stephanophorus diadematus Ocotea teleiandra</i>     | 25.35 | -0.380 | low | Plant-skewed | 1 |
| <i>Tachyphonus coronatus Myrsine lancifolia</i>        | 25.32 | -0.719 | low | Plant-skewed | 1 |
| <i>Saltator similis Matayba guianensis</i>             | 25.32 | -0.706 | low | Plant-skewed | 1 |
| <i>Turdus leucomelas Nectandra megapotamica</i>        | 25.32 | -0.740 | low | Plant-skewed | 1 |
| <i>Turdus flavipes Myrsine umbellata</i>               | 25.30 | -0.582 | low | Plant-skewed | 2 |
| <i>Tangara seledon Ficus sp</i>                        | 25.23 | -0.778 | low | Plant-skewed | 2 |
| <i>Selenidera maculirostris Campomanesia guaviroba</i> | 25.22 | 0.930  | low | Bird-skewed  | 1 |
| <i>Turdus rufiventris Ilex brevicuspis</i>             | 25.20 | -0.671 | low | Plant-skewed | 2 |
| <i>Tangara desmaresti Cupania vernalis</i>             | 25.13 | -0.891 | low | Plant-skewed | 1 |
| <i>Tachyphonus coronatus Matayba guianensis</i>        | 25.12 | -0.716 | low | Plant-skewed | 1 |
| <i>Coereba flaveola Trichilia clausseni</i>            | 25.07 | -0.371 | low | Plant-skewed | 1 |
| <i>Pteroglossus bailloni Nectandra reticulata</i>      | 25.03 | 0.069  | low | Bird-skewed  | 1 |
| <i>Carpornis cucullata Rudgea jasminoides</i>          | 25.02 | 0.560  | low | Bird-skewed  | 1 |
| <i>Turdus rufiventris Myrsine sp</i>                   | 24.98 | -0.667 | low | Plant-skewed | 1 |
| <i>Dacnis cayana Myrsine umbellata</i>                 | 24.97 | -0.601 | low | Plant-skewed | 3 |
| <i>Turdus albicollis Ficus organensis</i>              | 24.92 | -0.563 | low | Plant-skewed | 1 |
| <i>Thraupis cyanoptera Ficus sp</i>                    | 24.90 | -0.794 | low | Plant-skewed | 1 |
| <i>Selenidera maculirostris Miconia cinnamomifolia</i> | 24.88 | 0.945  | low | Bird-skewed  | 2 |
| <i>Cyanerpes cyaneus Clusia hilariana</i>              | 24.84 | -0.322 | low | Plant-skewed | 2 |
| <i>Penelope obscura Nectandra grandiflora</i>          | 24.73 | -0.025 | low | Plant-skewed | 1 |
| <i>Turdus rufiventris Ficus enormis</i>                | 24.73 | -0.663 | low | Plant-skewed | 1 |
| <i>Saltator similis Ilex brevicuspis</i>               | 24.72 | -0.697 | low | Plant-skewed | 1 |
| <i>Elaenia mesoleuca Myrsine sp</i>                    | 24.70 | -0.682 | low | Plant-skewed | 1 |
| <i>Pitangus sulphuratus Struthanthus martianus</i>     | 24.59 | 0.049  | low | Bird-skewed  | 1 |

|                                                            |       |        |     |              |   |
|------------------------------------------------------------|-------|--------|-----|--------------|---|
| <i>Tangara cyanocephala</i> <i>Myrsine coriacea</i>        | 24.58 | -0.841 | low | Plant-skewed | 2 |
| <i>Penelope obscura</i> <i>Allophylus edulis</i>           | 24.58 | -0.012 | low | Plant-skewed | 1 |
| <i>Turdus albicollis</i> <i>Ocotea bicolor</i>             | 24.57 | -0.553 | low | Plant-skewed | 1 |
| <i>Dacnis cayana</i> <i>Ficus hirsuta</i>                  | 24.55 | -0.591 | low | Plant-skewed | 1 |
| <i>Tachyphonus coronatus</i> <i>Ilex brevicuspis</i>       | 24.52 | -0.707 | low | Plant-skewed | 1 |
| <i>Tangara peruviana</i> <i>Myrsine parvifolia</i>         | 24.51 | -0.642 | low | Plant-skewed | 1 |
| <i>Trichothraupis melanops</i> <i>Ocotea corymbosa</i>     | 24.50 | -0.585 | low | Plant-skewed | 1 |
| <i>Thraupis ornate</i> <i>Myrsine coriacea</i>             | 24.48 | -0.846 | low | Plant-skewed | 2 |
| <i>Turdus flavipes</i> <i>Ocotea bicolor</i>               | 24.44 | -0.561 | low | Plant-skewed | 1 |
| <i>Thraupis palmarum</i> <i>Myrsine coriacea</i>           | 24.44 | -0.848 | low | Plant-skewed | 3 |
| <i>Tangara mexicana</i> <i>Myrsine umbellata</i>           | 24.41 | -0.632 | low | Plant-skewed | 1 |
| <i>Thraupis sayaca</i> <i>Guettarda viburnoides</i>        | 24.40 | -0.871 | low | Plant-skewed | 1 |
| <i>Tangara seledon</i> <i>Myrsine lancifolia</i>           | 24.36 | -0.768 | low | Plant-skewed | 1 |
| <i>Hemithraupis ruficapilla</i> <i>Myrsine sp</i>          | 24.36 | -0.701 | low | Plant-skewed | 1 |
| <i>Trichothraupis melanops</i> <i>Ocotea sp</i>            | 24.27 | -0.579 | low | Plant-skewed | 1 |
| <i>Myiozetetes similis</i> <i>Trichilia clauseni</i>       | 24.24 | -0.425 | low | Plant-skewed | 1 |
| <i>Saltator maximus</i> <i>Clusia hilariana</i>            | 24.22 | -0.364 | low | Plant-skewed | 1 |
| <i>Penelope obscura</i> <i>Nectandra lanceolata</i>        | 24.20 | 0.018  | low | Bird-skewed  | 1 |
| <i>Turdus leucomelas</i> <i>Ilex brevicuspis</i>           | 24.19 | -0.725 | low | Plant-skewed | 1 |
| <i>Turdus albicollis</i> <i>Myrsine gardneriana</i>        | 24.18 | -0.543 | low | Plant-skewed | 1 |
| <i>Mionectes rufiventris</i> <i>Struthanthus concinnus</i> | 24.15 | 0.005  | low | Bird-skewed  | 1 |
| <i>Mionectes rufiventris</i> <i>Struthanthus martianus</i> | 24.09 | 0.010  | low | Bird-skewed  | 1 |
| <i>Turdus rufiventris</i> <i>Myrsine umbellata</i>         | 24.08 | -0.651 | low | Plant-skewed | 2 |
| <i>Tachyphonus coronatus</i> <i>Ficus enormis</i>          | 24.05 | -0.700 | low | Plant-skewed | 1 |
| <i>Thraupis cyanoptera</i> <i>Myrsine lancifolia</i>       | 24.03 | -0.784 | low | Plant-skewed | 1 |
| <i>Thlypopsis sordida</i> <i>Trichilia clauseni</i>        | 24.03 | -0.439 | low | Plant-skewed | 2 |
| <i>Tangara cyanocephala</i> <i>Ficus sp</i>                | 24.01 | -0.837 | low | Plant-skewed | 1 |
| <i>Thraupis sayaca</i> <i>Myrsine coriacea</i>             | 24.00 | -0.869 | low | Plant-skewed | 2 |
| <i>Tangara mexicana</i> <i>Ficus hirsuta</i>               | 24.00 | -0.623 | low | Plant-skewed | 1 |
| <i>Thraupis episcopus</i> <i>Myrsine coriacea</i>          | 23.99 | -0.869 | low | Plant-skewed | 1 |
| <i>Turdus leucomelas</i> <i>Myrsine sp</i>                 | 23.97 | -0.721 | low | Plant-skewed | 1 |



|                                                   |       |        |     |              |   |
|---------------------------------------------------|-------|--------|-----|--------------|---|
| <i>Empidonomus varius Trichilia clauseni</i>      | 23.95 | -0.444 | low | Plant-skewed | 1 |
| <i>Tangara preciosa Ilex brevicuspis</i>          | 23.94 | -0.738 | low | Plant-skewed | 1 |
| <i>Euphonia violacea Lantana pohliana</i>         | 23.93 | -0.059 | low | Plant-skewed | 1 |
| <i>Thraupis palmarum Ficus sp</i>                 | 23.86 | -0.844 | low | Plant-skewed | 1 |
| <i>Tityra cayana Miconia inconspicua</i>          | 23.85 | 0.729  | low | Bird-skewed  | 1 |
| <i>Mimus gilvus Eugenia astringens</i>            | 23.84 | 0.811  | low | Bird-skewed  | 1 |
| <i>Mimus saturninus Ossaea amygdaloides</i>       | 23.78 | 0.814  | low | Bird-skewed  | 1 |
| <i>Myiarchus sp Myrsine sp</i>                    | 23.72 | -0.735 | low | Plant-skewed | 1 |
| <i>Chiroxiphia caudate Myrsine umbellata</i>      | 23.70 | -0.672 | low | Plant-skewed | 2 |
| <i>Tangara desmaresti Myrsine coriacea</i>        | 23.69 | -0.883 | low | Plant-skewed | 2 |
| <i>Myiozetetes similis Clusia criuva</i>          | 23.65 | -0.402 | low | Plant-skewed | 1 |
| <i>Saltator similis Myrsine umbellata</i>         | 23.60 | -0.678 | low | Plant-skewed | 1 |
| <i>Euphonia violacea Struthanthus martianus</i>   | 23.59 | -0.032 | low | Plant-skewed | 1 |
| <i>Tyrannus savana Myrsine sp</i>                 | 23.59 | -0.742 | low | Plant-skewed | 1 |
| <i>Turdus rufiventris Ficus organensis</i>        | 23.57 | -0.641 | low | Plant-skewed | 1 |
| <i>Habia rubica Psychotria gracilentia</i>        | 23.55 | 0.647  | low | Bird-skewed  | 1 |
| <i>Cacicus haemorrhous Clusia criuva</i>          | 23.53 | -0.411 | low | Plant-skewed | 2 |
| <i>Cacicus haemorrhous Clusia hilariana</i>       | 23.53 | -0.411 | low | Plant-skewed | 1 |
| <i>Coryphospingus cucullatus Ficus organensis</i> | 23.53 | -0.643 | low | Plant-skewed | 1 |
| <i>Hemithraupis ruficapilla Myrsine umbellata</i> | 23.46 | -0.685 | low | Plant-skewed | 1 |
| <i>Manacus manacus Guarea guidonia</i>            | 23.44 | 0.329  | low | Bird-skewed  | 1 |
| <i>Habia rubica Rhipsalis camposportoana</i>      | 23.43 | 0.654  | low | Bird-skewed  | 1 |
| <i>Camptostoma obsoletum Miconia tristis</i>      | 23.40 | 0.783  | low | Bird-skewed  | 1 |
| <i>Tachyphonus coronatus Myrsine umbellata</i>    | 23.40 | -0.689 | low | Plant-skewed | 2 |
| <i>Ilicura militaris Psychotria vellosiana</i>    | 23.38 | 0.362  | low | Bird-skewed  | 1 |
| <i>Myiodynastes maculatus Allophylus edulis</i>   | 23.37 | -0.110 | low | Plant-skewed | 1 |
| <i>Elaenia sp Trichilia clauseni</i>              | 23.37 | -0.482 | low | Plant-skewed | 1 |
| <i>Empidonomus varius Clusia criuva</i>           | 23.36 | -0.422 | low | Plant-skewed | 1 |
| <i>Tangara seledon Myrsine sp</i>                 | 23.33 | -0.755 | low | Plant-skewed | 1 |
| <i>Turdus albicollis Ocotea teleiandra</i>        | 23.24 | -0.515 | low | Plant-skewed | 1 |
| <i>Thraupis cyanoptera Ilex brevicuspis</i>       | 23.23 | -0.775 | low | Plant-skewed | 1 |

|                                                       |       |        |     |              |   |
|-------------------------------------------------------|-------|--------|-----|--------------|---|
| <i>Phibalura flavirostris Psychotria mapourioides</i> | 23.21 | 0.385  | low | Bird-skewed  | 1 |
| <i>Procnias nudicollis Ficus luschnathiana</i>        | 23.21 | 0.721  | low | Bird-skewed  | 1 |
| <i>Manacus manacus Psychotria vellosiana</i>          | 23.14 | 0.351  | low | Bird-skewed  | 1 |
| <i>Tangara cyanocephala Myrsine lancifolia</i>        | 23.14 | -0.830 | low | Plant-skewed | 1 |
| <i>Carpornis cucullata Rhipsalis teres</i>            | 23.13 | 0.669  | low | Bird-skewed  | 1 |
| <i>Saltator similis Ficus organensis</i>              | 23.09 | -0.668 | low | Plant-skewed | 1 |
| <i>Tangara seledon Ficus enormis</i>                  | 23.08 | -0.752 | low | Plant-skewed | 1 |
| <i>Habia rubica Miconia valtheri</i>                  | 23.07 | 0.675  | low | Bird-skewed  | 1 |
| <i>Turdus leucomelas Myrsine umbellata</i>            | 23.07 | -0.707 | low | Plant-skewed | 3 |
| <i>Elaenia flavogaster Ocotea notata</i>              | 23.06 | -0.511 | low | Plant-skewed | 1 |
| <i>Carpornis cucullata Miconia valtheri</i>           | 23.04 | 0.674  | low | Bird-skewed  | 1 |
| <i>Pteroglossus bailloni Ilex microdonta</i>          | 23.03 | 0.222  | low | Bird-skewed  | 1 |
| <i>Thraupis ornate Myrsine lancifolia</i>             | 23.03 | -0.835 | low | Plant-skewed | 1 |
| <i>Elaenia flavogaster Trichilia clauseni</i>         | 22.97 | -0.508 | low | Plant-skewed | 2 |
| <i>Chiroxiphia caudate Ocotea sp</i>                  | 22.94 | -0.657 | low | Plant-skewed | 1 |
| <i>Tangara cyanocephala Matayba guianensis</i>        | 22.93 | -0.828 | low | Plant-skewed | 1 |
| <i>Phyllomyias fasciatus Struthanthus sp</i>          | 22.91 | 0.016  | low | Bird-skewed  | 1 |
| <i>Tangara cayana Myrsine umbellata</i>               | 22.87 | -0.719 | low | Plant-skewed | 1 |
| <i>Carpornis cucullata Myrcia spectabilis</i>         | 22.86 | 0.685  | low | Bird-skewed  | 2 |
| <i>Carpornis melanocephala Myrcia spectabilis</i>     | 22.86 | 0.685  | low | Bird-skewed  | 2 |
| <i>Turdus leucomelas Guarea kunthiana</i>             | 22.71 | -0.701 | low | Plant-skewed | 1 |
| <i>Tyrannus melancholicus Myrsine umbellata</i>       | 22.69 | -0.729 | low | Plant-skewed | 1 |
| <i>Carpornis melanocephala Myrcia pulchra</i>         | 22.68 | 0.695  | low | Bird-skewed  | 1 |
| <i>Mimus gilvus Paullinia weinmanniifolia</i>         | 22.67 | 0.869  | low | Bird-skewed  | 1 |
| <i>Pipra pipra Clusia hilariana</i>                   | 22.65 | -0.470 | low | Plant-skewed | 1 |
| <i>Procnias nudicollis Myrcia ilheosensis</i>         | 22.63 | 0.753  | low | Bird-skewed  | 1 |
| <i>Ramphocelus bresilius Myrsine umbellata</i>        | 22.60 | -0.733 | low | Plant-skewed | 1 |
| <i>Trichothraupis melanops Trichilia clauseni</i>     | 22.58 | -0.533 | low | Plant-skewed | 1 |
| <i>Pyroderus scutatus Marlierea obscura</i>           | 22.56 | 0.887  | low | Bird-skewed  | 1 |
| <i>Carpornis melanocephala Myrcia pubipetala</i>      | 22.55 | 0.703  | low | Bird-skewed  | 1 |
| <i>Carpornis cucullata Myrcia pubipetala</i>          | 22.55 | 0.703  | low | Bird-skewed  | 1 |

|                                                      |       |        |     |              |   |
|------------------------------------------------------|-------|--------|-----|--------------|---|
| <i>Pyroderus scutatus Marlierea reitzii</i>          | 22.54 | 0.887  | low | Bird-skewed  | 1 |
| <i>Celeus flavescens Guarea guidonia</i>             | 22.53 | 0.283  | low | Bird-skewed  | 1 |
| <i>Dacnis cayana Trichilia claussoni</i>             | 22.51 | -0.537 | low | Plant-skewed | 2 |
| <i>Nemosia pileata Guarea guidonia</i>               | 22.48 | 0.280  | low | Bird-skewed  | 1 |
| <i>Procnias nudicollis Miconia chartacea</i>         | 22.47 | 0.762  | low | Bird-skewed  | 1 |
| <i>Habia rubica Ficus luschnathiana</i>              | 22.47 | 0.709  | low | Bird-skewed  | 1 |
| <i>Pyroderus scutatus Myrcia brasiliensis</i>        | 22.45 | 0.892  | low | Bird-skewed  | 1 |
| <i>Carpornis cucullata Ficus luschnathiana</i>       | 22.44 | 0.709  | low | Bird-skewed  | 1 |
| <i>Tangara seledon Myrsine umbellata</i>             | 22.43 | -0.743 | low | Plant-skewed | 1 |
| <i>Turdus albicollis Clusia criuva</i>               | 22.39 | -0.488 | low | Plant-skewed | 1 |
| <i>Tityra cayana Ocotea puberula</i>                 | 22.37 | 0.808  | low | Bird-skewed  | 1 |
| <i>Thraupis ornate Ilex brevicuspis</i>              | 22.22 | -0.828 | low | Plant-skewed | 1 |
| <i>Ramphastos dicolorus Allophylus edulis</i>        | 22.21 | -0.204 | low | Plant-skewed | 1 |
| <i>Trogon surrucura Ficus luschnathiana</i>          | 22.20 | 0.705  | low | Bird-skewed  | 1 |
| <i>Lipaugus lanioides Alibertia sp</i>               | 22.16 | -0.186 | low | Plant-skewed | 1 |
| <i>Penelope obscura Vassobia breviflora</i>          | 22.16 | 0.185  | low | Bird-skewed  | 1 |
| <i>Tyrannus melancholicus Ocotea corymbosa</i>       | 22.16 | -0.720 | low | Plant-skewed | 1 |
| <i>Carpornis melanocephala Myrcia anacardiifolia</i> | 22.12 | 0.727  | low | Bird-skewed  | 2 |
| <i>Carpornis cucullata Myrcia anacardiifolia</i>     | 22.12 | 0.727  | low | Bird-skewed  | 2 |
| <i>Turdus leucomelas Cestrum mariquitense</i>        | 22.11 | -0.691 | low | Plant-skewed | 2 |
| <i>Tangara cyanocephala Myrsine sp</i>               | 22.11 | -0.820 | low | Plant-skewed | 1 |
| <i>Mimus saturninus Ocotea pulchella</i>             | 22.10 | 0.898  | low | Bird-skewed  | 1 |
| <i>Ramphastos dicolorus Nectandra membranacea</i>    | 22.07 | -0.195 | low | Plant-skewed | 1 |
| <i>Pteroglossus aracari Nectandra lanceolata</i>     | 22.07 | -0.160 | low | Plant-skewed | 1 |
| <i>Pteroglossus bailloni Psychotria vellosiana</i>   | 22.07 | 0.297  | low | Bird-skewed  | 1 |
| <i>Ramphastos vitellinus Nectandra membranacea</i>   | 22.06 | -0.196 | low | Plant-skewed | 1 |
| <i>Thraupis sayaca Ficus insipida</i>                | 22.01 | -0.855 | low | Plant-skewed | 1 |
| <i>Pitangus sulphuratus Guarea guidonia</i>          | 22.01 | 0.253  | low | Bird-skewed  | 2 |
| <i>Thraupis ornate Myrsine sp</i>                    | 22.00 | -0.826 | low | Plant-skewed | 1 |

|                                                    |       |        |     |              |   |
|----------------------------------------------------|-------|--------|-----|--------------|---|
| <i>Carpornis melanocephala Miconia sp</i>          | 21.98 | 0.735  | low | Bird-skewed  | 1 |
| <i>Thraupis palmarum Myrsine sp</i>                | 21.96 | -0.828 | low | Plant-skewed | 1 |
| <i>Procnias nudicollis Eugenia astringens</i>      | 21.94 | 0.791  | low | Bird-skewed  | 1 |
| <i>Dacnis cayana Clusia criuva</i>                 | 21.93 | -0.519 | low | Plant-skewed | 4 |
| <i>Dacnis cayana Clusia hilariana</i>              | 21.93 | -0.519 | low | Plant-skewed | 1 |
| <i>Pyroderus scutatus Campomanesia xanthocarpa</i> | 21.91 | 0.919  | low | Bird-skewed  | 1 |
| <i>Tangara cyanocephala Ficus enormis</i>          | 21.86 | -0.818 | low | Plant-skewed | 1 |
| <i>Habia rubica Miconia discolor</i>               | 21.78 | 0.749  | low | Bird-skewed  | 1 |
| <i>Turdus albicollis Ixora gardneriana</i>         | 21.78 | -0.466 | low | Plant-skewed | 1 |
| <i>Thraupis ornate Ficus enormis</i>               | 21.75 | -0.824 | low | Plant-skewed | 1 |
| <i>Thraupis sayaca Ilex brevicuspis</i>            | 21.75 | -0.853 | low | Plant-skewed | 1 |
| <i>Turdus leucomelas Trichilia catigua</i>         | 21.74 | -0.684 | low | Plant-skewed | 1 |
| <i>Thraupis palmarum Ficus enormis</i>             | 21.71 | -0.826 | low | Plant-skewed | 1 |
| <i>Carpornis cucullata Miconia chartacea</i>       | 21.71 | 0.751  | low | Bird-skewed  | 1 |
| <i>Carpornis cucullata Leandra regnellii</i>       | 21.67 | 0.753  | low | Bird-skewed  | 1 |
| <i>Habia rubica Leandra australis</i>              | 21.66 | 0.756  | low | Bird-skewed  | 1 |
| <i>Ramphocelus carbo Cestrum mariquitense</i>      | 21.65 | -0.718 | low | Plant-skewed | 1 |
| <i>Carpornis cucullata Miconia budlejoides</i>     | 21.65 | 0.754  | low | Bird-skewed  | 1 |
| <i>Habia rubica Miconia racemifera</i>             | 21.64 | 0.757  | low | Bird-skewed  | 1 |
| <i>Habia rubica Leandra acutiflora</i>             | 21.63 | 0.757  | low | Bird-skewed  | 1 |
| <i>Carpornis cucullata Leandra australis</i>       | 21.63 | 0.755  | low | Bird-skewed  | 1 |
| <i>Turdus amaurochalinus Ilex pseudobuxus</i>      | 21.60 | 0.126  | low | Bird-skewed  | 1 |
| <i>Habia rubica Miconia pusilliflora</i>           | 21.53 | 0.763  | low | Bird-skewed  | 1 |
| <i>Mionectes oleaginous Guarea guidonia</i>        | 21.51 | 0.223  | low | Bird-skewed  | 1 |
| <i>Carpornis cucullata Miconia pusilliflora</i>    | 21.50 | 0.763  | low | Bird-skewed  | 1 |
| <i>Turdus sp Clusia criuva</i>                     | 21.50 | -0.548 | low | Plant-skewed | 1 |
| <i>Tityra cayana Myrcia splendens</i>              | 21.48 | 0.855  | low | Bird-skewed  | 1 |
| <i>Tangara desmaresti Phoradendron sp</i>          | 21.48 | -0.870 | low | Plant-skewed | 1 |
| <i>Turdus amaurochalinus Acnistus arborescens</i>  | 21.48 | 0.137  | low | Bird-skewed  | 1 |
| <i>Habia rubica Leandra variabilis</i>             | 21.45 | 0.768  | low | Bird-skewed  | 1 |

|                                                     |       |        |     |              |   |
|-----------------------------------------------------|-------|--------|-----|--------------|---|
| <i>Carpornis cucullata Leandra variabilis</i>       | 21.42 | 0.767  | low | Bird-skewed  | 1 |
| <i>Trogon sarrucura Miconia budlejoides</i>         | 21.41 | 0.751  | low | Bird-skewed  | 1 |
| <i>Pteroglossus bailloni Psychotria leiocarpa</i>   | 21.40 | 0.348  | low | Bird-skewed  | 1 |
| <i>Thraupis episcopus Genipa americana</i>          | 21.36 | -0.851 | low | Plant-skewed | 1 |
| <i>Mimus gilvus Miconia cinnamomifolia</i>          | 21.36 | 0.935  | low | Bird-skewed  | 1 |
| <i>Carpornis cucullata Leandra sp</i>               | 21.33 | 0.773  | low | Bird-skewed  | 1 |
| <i>Habia rubica Leandra refracta</i>                | 21.29 | 0.777  | low | Bird-skewed  | 1 |
| <i>Conirostrum speciosum Acnistus arborescens</i>   | 21.28 | 0.122  | low | Bird-skewed  | 1 |
| <i>Ramphocelus carbo Trichilia catigua</i>          | 21.27 | -0.712 | low | Plant-skewed | 1 |
| <i>Thraupis episcopus Ficus enormis</i>             | 21.27 | -0.850 | low | Plant-skewed | 1 |
| <i>Chiroxiphia caudate Trichilia clauseni</i>       | 21.25 | -0.620 | low | Plant-skewed | 1 |
| <i>Tangara cyanocephala Myrsine umbellata</i>       | 21.21 | -0.811 | low | Plant-skewed | 2 |
| <i>Euphonia pectoralis Psychotria vellosiana</i>    | 21.17 | 0.245  | low | Bird-skewed  | 1 |
| <i>Penelope obscura Psychotria suterella</i>        | 21.16 | 0.267  | low | Bird-skewed  | 1 |
| <i>Habia rubica Leandra melastomoides</i>           | 21.16 | 0.785  | low | Bird-skewed  | 1 |
| <i>Carpornis cucullata Leandra pilonensis</i>       | 21.15 | 0.783  | low | Bird-skewed  | 1 |
| <i>Habia rubica Ossaea amygdaloides</i>             | 21.15 | 0.785  | low | Bird-skewed  | 1 |
| <i>Saltator similis Trichilia clauseni</i>          | 21.14 | -0.626 | low | Plant-skewed | 1 |
| <i>Carpornis cucullata Eugenia melanogyna</i>       | 21.12 | 0.785  | low | Bird-skewed  | 1 |
| <i>Carpornis melanocephala Eugenia mosenii</i>      | 21.11 | 0.785  | low | Bird-skewed  | 2 |
| <i>Carpornis cucullata Eugenia mosenii</i>          | 21.11 | 0.785  | low | Bird-skewed  | 1 |
| <i>Carpornis melanocephala Eugenia neoglomerata</i> | 21.11 | 0.786  | low | Bird-skewed  | 2 |
| <i>Thraupis ornate Myrsine umbellata</i>            | 21.10 | -0.817 | low | Plant-skewed | 2 |
| <i>Pteroglossus bailloni Ficus eximia</i>           | 21.08 | 0.373  | low | Bird-skewed  | 1 |
| <i>Thraupis palmarum Myrsine umbellata</i>          | 21.06 | -0.820 | low | Plant-skewed | 1 |
| <i>Turdus rufiventris Clusia criuva</i>             | 21.04 | -0.579 | low | Plant-skewed | 1 |
| <i>Coryphospingus pileatus Clusia hilariana</i>     | 20.99 | -0.582 | low | Plant-skewed | 1 |
| <i>Carpornis cucullata Nectandra cuspidata</i>      | 20.98 | 0.793  | low | Bird-skewed  | 1 |
| <i>Cacicus haemorrhous Nectandra membranacea</i>    | 20.95 | -0.286 | low | Plant-skewed | 1 |
| <i>Tachyphonus coronatus Trichilia clauseni</i>     | 20.95 | -0.639 | low | Plant-skewed | 2 |

|                                                    |       |        |     |              |   |
|----------------------------------------------------|-------|--------|-----|--------------|---|
| <i>Turdus amaurochalinus Guarea guidonia</i>       | 20.93 | 0.184  | low | Bird-skewed  | 1 |
| <i>Procnias nudicollis Myrcia splendens</i>        | 20.86 | 0.851  | low | Bird-skewed  | 1 |
| <i>Dacnis cayana Lantana camara</i>                | 20.80 | -0.479 | low | Plant-skewed | 1 |
| <i>Trogon surrucura Ocotea puberula</i>            | 20.74 | 0.790  | low | Bird-skewed  | 1 |
| <i>Chiroxiphia caudate Ixora venulosa</i>          | 20.66 | -0.605 | low | Plant-skewed | 1 |
| <i>Chiroxiphia caudate Clusia criuva</i>           | 20.66 | -0.605 | low | Plant-skewed | 1 |
| <i>Thraupis sayaca Myrsine umbellata</i>           | 20.63 | -0.844 | low | Plant-skewed | 2 |
| <i>Myiarchus ferox Trichilia claussoni</i>         | 20.62 | -0.660 | low | Plant-skewed | 1 |
| <i>Thraupis episcopus Myrsine umbellata</i>        | 20.61 | -0.845 | low | Plant-skewed | 1 |
| <i>Turdus leucomelas Trichilia claussoni</i>       | 20.61 | -0.661 | low | Plant-skewed | 2 |
| <i>Myiarchus swainsoni Clusia criuva</i>           | 20.58 | -0.610 | low | Plant-skewed | 1 |
| <i>Saltator similis Ixora venulosa</i>             | 20.56 | -0.612 | low | Plant-skewed | 1 |
| <i>Carpornis cucullata Siphoneugena densiflora</i> | 20.50 | 0.820  | low | Bird-skewed  | 1 |
| <i>Myiodynastes maculatus Guarea guidonia</i>      | 20.42 | 0.145  | low | Bird-skewed  | 1 |
| <i>Tangara cayana Trichilia claussoni</i>          | 20.42 | -0.674 | low | Plant-skewed | 2 |
| <i>Tachyphonus coronatus Clusia criuva</i>         | 20.36 | -0.625 | low | Plant-skewed | 1 |
| <i>Procnias nudicollis Myrcia brasiliensis</i>     | 20.33 | 0.879  | low | Bird-skewed  | 1 |
| <i>Tangara desmaresti Myrsine umbellata</i>        | 20.32 | -0.861 | low | Plant-skewed | 1 |
| <i>Tyrannus melancholicus Trichilia claussoni</i>  | 20.24 | -0.685 | low | Plant-skewed | 1 |
| <i>Ramphocelus carbo Trichilia claussoni</i>       | 20.15 | -0.691 | low | Plant-skewed | 2 |
| <i>Thraupis sayaca Ficus organensis</i>            | 20.12 | -0.840 | low | Plant-skewed | 1 |
| <i>Pteroglossus bailloni Amaioua intermedia</i>    | 20.11 | 0.448  | low | Bird-skewed  | 1 |
| <i>Carpornis cucullata Myrcia splendens</i>        | 20.09 | 0.844  | low | Bird-skewed  | 1 |
| <i>Turdus subalaris Miconia inconspicua</i>        | 20.08 | 0.661  | low | Bird-skewed  | 1 |
| <i>Myiarchus ferox Clusia criuva</i>               | 20.04 | -0.647 | low | Plant-skewed | 2 |
| <i>Turdus albicollis Allophylus edulis</i>         | 19.95 | -0.387 | low | Plant-skewed | 1 |
| <i>Ramphastos dicolorus Ilex microdonta</i>        | 19.92 | -0.023 | low | Plant-skewed | 1 |
| <i>Trogon surrucura Myrcia splendens</i>           | 19.85 | 0.842  | low | Bird-skewed  | 1 |
| <i>Turdus albicollis Nectandra membranacea</i>     | 19.81 | -0.380 | low | Plant-skewed | 2 |
| <i>Tangara desmaresti Ocotea corymbosa</i>         | 19.79 | -0.857 | low | Plant-skewed | 1 |
| <i>Machaeropterus regulus Guarea guidonia</i>      | 19.77 | 0.092  | low | Bird-skewed  | 1 |

|                                                      |       |        |     |              |   |
|------------------------------------------------------|-------|--------|-----|--------------|---|
| <i>Stephanophorus diadematus Ilex microdonta</i>     | 19.77 | -0.037 | low | Plant-skewed | 1 |
| <i>Carpornis cucullata Paullinia sp</i>              | 19.75 | 0.864  | low | Bird-skewed  | 1 |
| <i>Turdus flavipes Nectandra membranacea</i>         | 19.68 | -0.390 | low | Plant-skewed | 1 |
| <i>Carpornis melanocephala Marlierea obscura</i>     | 19.68 | 0.868  | low | Bird-skewed  | 2 |
| <i>Thraupis sayaca Cestrum mariquitense</i>          | 19.67 | -0.835 | low | Plant-skewed | 1 |
| <i>Stephanophorus diadematus Vassobia breviflora</i> | 19.65 | -0.025 | low | Plant-skewed | 1 |
| <i>Tyrannus melancholicus Clusia criuva</i>          | 19.65 | -0.673 | low | Plant-skewed | 3 |
| <i>Carpornis cucullata Miconia sellowiana</i>        | 19.64 | 0.870  | low | Bird-skewed  | 2 |
| <i>Coereba flaveola Acnistus arborescens</i>         | 19.63 | -0.027 | low | Plant-skewed | 1 |
| <i>Carpornis melanocephala Marlierea suaveolens</i>  | 19.60 | 0.872  | low | Bird-skewed  | 1 |
| <i>Turdus albicollis Nectandra lanceolata</i>        | 19.58 | -0.367 | low | Plant-skewed | 1 |
| <i>Carpornis cucullata Myrcia hebeptala</i>          | 19.57 | 0.874  | low | Bird-skewed  | 1 |
| <i>Ramphocelus bresilius Clusia criuva</i>           | 19.56 | -0.679 | low | Plant-skewed | 1 |
| <i>Melanerpes flavifrons Miconia tristis</i>         | 19.51 | 0.728  | low | Bird-skewed  | 1 |
| <i>Hylophilus poicilotis Miconia pusilliflora</i>    | 19.48 | 0.732  | low | Bird-skewed  | 1 |
| <i>Dacnis cayana Lantana pohliana</i>                | 19.45 | -0.423 | low | Plant-skewed | 1 |
| <i>Carpornis cucullata Ocotea pulchella</i>          | 19.43 | 0.882  | low | Bird-skewed  | 1 |
| <i>Carpornis cucullata Ocotea spixiana</i>           | 19.43 | 0.882  | low | Bird-skewed  | 1 |
| <i>Ilicura militaris Miconia theizans</i>            | 19.40 | 0.641  | low | Bird-skewed  | 1 |
| <i>Tangara seledon Clusia criuva</i>                 | 19.39 | -0.690 | low | Plant-skewed | 1 |
| <i>Megarynchus pitangua Guarea guidonia</i>          | 19.34 | 0.053  | low | Bird-skewed  | 1 |
| <i>Ilicura militaris Ficus luschnathiana</i>         | 19.34 | 0.646  | low | Bird-skewed  | 1 |
| <i>Zonotrichia capensis Miconia tristis</i>          | 19.30 | 0.724  | low | Bird-skewed  | 1 |
| <i>Thraupis episcopus Trichilia catigua</i>          | 19.29 | -0.832 | low | Plant-skewed | 1 |
| <i>Cnemotriccus fuscatus Guarea guidonia</i>         | 19.26 | 0.045  | low | Bird-skewed  | 1 |
| <i>Tachyphonus coronatus Lantana camara</i>          | 19.23 | -0.594 | low | Plant-skewed | 1 |
| <i>Ilicura militaris Miconia tentaculifera</i>       | 19.14 | 0.659  | low | Bird-skewed  | 1 |
| <i>Chlorophonia cyanea Miconia pusilliflora</i>      | 19.10 | 0.725  | low | Bird-skewed  | 1 |
| <i>Coereba flaveola Guarea guidonia</i>              | 19.09 | 0.028  | low | Bird-skewed  | 2 |
| <i>Trogon surrucura Eugenia uniflora</i>             | 19.09 | 0.886  | low | Bird-skewed  | 1 |

|                                                           |       |        |     |              |   |
|-----------------------------------------------------------|-------|--------|-----|--------------|---|
| <i>Pachyramphus validus Ocotea puberula</i>               | 19.03 | 0.767  | low | Bird-skewed  | 1 |
| <i>Ramphocelus bresilius Lantana sp</i>                   | 19.02 | -0.666 | low | Plant-skewed | 1 |
| <i>Ramphastos dicolorus Psychotria vellosiana</i>         | 18.95 | 0.075  | low | Bird-skewed  | 1 |
| <i>Tangara mexicana Lantana pohliana</i>                  | 18.90 | -0.467 | low | Plant-skewed | 1 |
| <i>Thraupis episcopus Inga laurina</i>                    | 18.90 | -0.828 | low | Plant-skewed | 1 |
| <i>Manacus manacus Miconia tentaculifera</i>              | 18.89 | 0.653  | low | Bird-skewed  | 1 |
| <i>Saltator maximus Guarea guidonia</i>                   | 18.83 | 0.001  | low | Bird-skewed  | 1 |
| <i>Myiozetetes similis Acnistus arborescens</i>           | 18.80 | -0.111 | low | Plant-skewed | 1 |
| <i>Lipaugus lanioides Psychotria mapourioides</i>         | 18.78 | 0.112  | low | Bird-skewed  | 1 |
| <i>Carpornis cucullata Miconia cubatanensis</i>           | 18.76 | 0.920  | low | Bird-skewed  | 1 |
| <i>Tangara seledon Ixora burchelliana</i>                 | 18.75 | -0.676 | low | Plant-skewed | 1 |
| <i>Manacus manacus Miconia albicans</i>                   | 18.72 | 0.666  | low | Bird-skewed  | 1 |
| <i>Ramphastos vitellinus Psychotria mapourioides</i>      | 18.67 | 0.102  | low | Bird-skewed  | 1 |
| <i>Ilicura militaris Miconia discolor</i>                 | 18.65 | 0.694  | low | Bird-skewed  | 1 |
| <i>Ilicura militaris Miconia chartacea</i>                | 18.60 | 0.697  | low | Bird-skewed  | 1 |
| <i>Turdus rufiventris Allophylus edulis</i>               | 18.60 | -0.496 | low | Plant-skewed | 1 |
| <i>Zonotrichia capensis Solanum<br/>granulosoleprosum</i> | 18.59 | 0.770  | low | Bird-skewed  | 1 |
| <i>Thlypopsis sordida Acnistus arborescens</i>            | 18.58 | -0.132 | low | Plant-skewed | 1 |
| <i>Ilicura militaris Miconia budlejoides</i>              | 18.55 | 0.701  | low | Bird-skewed  | 1 |
| <i>Phibalura flavirostris Miconia pusilliflora</i>        | 18.49 | 0.713  | low | Bird-skewed  | 1 |
| <i>Ilicura militaris Miconia tristis</i>                  | 18.45 | 0.708  | low | Bird-skewed  | 1 |
| <i>Thraupis cyanoptera Ixora burchelliana</i>             | 18.42 | -0.699 | low | Plant-skewed | 1 |
| <i>Ilicura militaris Miconia pusilliflora</i>             | 18.40 | 0.711  | low | Bird-skewed  | 1 |
| <i>Ilicura militaris Leandra variabilis</i>               | 18.32 | 0.717  | low | Bird-skewed  | 1 |
| <i>Thraupis sayaca Ocotea notata</i>                      | 18.27 | -0.820 | low | Plant-skewed | 1 |
| <i>Myiozetetes similis Guarea guidonia</i>                | 18.25 | -0.060 | low | Plant-skewed | 1 |
| <i>Tijuca atra Miconia chartacea</i>                      | 18.25 | 0.689  | low | Bird-skewed  | 1 |
| <i>Ilicura militaris Leandra laevigata</i>                | 18.25 | 0.722  | low | Bird-skewed  | 1 |
| <i>Pitangus sulphuratus Myrcia palustris</i>              | 18.24 | 0.553  | low | Bird-skewed  | 1 |
| <i>Ilicura militaris Leandra sp</i>                       | 18.23 | 0.723  | low | Bird-skewed  | 1 |



|                                                         |       |        |     |              |   |
|---------------------------------------------------------|-------|--------|-----|--------------|---|
| <i>Turdus rufiventris Nectandra lanceolata</i>          | 18.22 | -0.480 | low | Plant-skewed | 1 |
| <i>Chiroxiphia caudate Allophylus edulis</i>            | 18.22 | -0.527 | low | Plant-skewed | 2 |
| <i>Turdus rufiventris Struthanthus martianus</i>        | 18.22 | -0.480 | low | Plant-skewed | 2 |
| <i>Thraupis sayaca Trichilia clauseni</i>               | 18.17 | -0.819 | low | Plant-skewed | 1 |
| <i>Phylloscartes sylviolus Miconia tristis</i>          | 18.17 | 0.702  | low | Bird-skewed  | 1 |
| <i>Tangara cyanocephala Clusia criuva</i>               | 18.17 | -0.773 | low | Plant-skewed | 2 |
| <i>Ilicura militaris Leandra sabiaensis</i>             | 18.16 | 0.728  | low | Bird-skewed  | 1 |
| <i>Stephanophorus diadematus Psychotria leiocarpa</i>   | 18.14 | 0.129  | low | Bird-skewed  | 1 |
| <i>Cacicus haemorrhous Guarea guidonia</i>              | 18.13 | -0.073 | low | Plant-skewed | 1 |
| <i>Euphonia pectoralis Rhipsalis camposportoana</i>     | 18.09 | 0.501  | low | Bird-skewed  | 1 |
| <i>Chiroxiphia caudate Nectandra membranacea</i>        | 18.08 | -0.521 | low | Plant-skewed | 1 |
| <i>Thraupis ornate Clusia criuva</i>                    | 18.06 | -0.780 | low | Plant-skewed | 1 |
| <i>Euphonia pectoralis Rhipsalis elliptica</i>          | 18.06 | 0.503  | low | Bird-skewed  | 1 |
| <i>Penelope superciliaris Myrcia pulchra</i>            | 17.96 | 0.582  | low | Bird-skewed  | 1 |
| <i>Icterus cayanensis Eugenia brasiliensis</i>          | 17.94 | 0.714  | low | Bird-skewed  | 1 |
| <i>Elaenia sp Acnistus arborescens</i>                  | 17.92 | -0.199 | low | Plant-skewed | 1 |
| <i>Tachyphonus coronatus Allophylus edulis</i>          | 17.92 | -0.551 | low | Plant-skewed | 2 |
| <i>Chiroxiphia caudate Struthanthus martianus</i>       | 17.84 | -0.512 | low | Plant-skewed | 1 |
| <i>Penelope superciliaris Myrcia pubipetala</i>         | 17.83 | 0.592  | low | Bird-skewed  | 1 |
| <i>Elaenia spectabilis Acnistus arborescens</i>         | 17.82 | -0.209 | low | Plant-skewed | 1 |
| <i>Euphonia pectoralis Rhipsalis teres</i>              | 17.82 | 0.523  | low | Bird-skewed  | 1 |
| <i>Saltator similis Struthanthus concinnus</i>          | 17.79 | -0.522 | low | Plant-skewed | 1 |
| <i>Nemosia pileata Miconia albicans</i>                 | 17.77 | 0.641  | low | Bird-skewed  | 1 |
| <i>Mionectes rufiventris Miconia valtheri</i>           | 17.76 | 0.533  | low | Bird-skewed  | 1 |
| <i>Euphonia pectoralis Miconia valtheri</i>             | 17.72 | 0.531  | low | Bird-skewed  | 1 |
| <i>Phyllomyias griseocapilla Miconia cinnamomifolia</i> | 17.70 | 0.920  | low | Bird-skewed  | 1 |
| <i>Turdus albicollis Ilex pseudobuxus</i>               | 17.66 | -0.247 | low | Plant-skewed | 1 |
| <i>Thraupis episcopus Clusia criuva</i>                 | 17.57 | -0.813 | low | Plant-skewed | 1 |
| <i>Turdus flavipes Ilex pseudobuxus</i>                 | 17.53 | -0.260 | low | Plant-skewed | 1 |

|                                                        |       |        |     |              |   |
|--------------------------------------------------------|-------|--------|-----|--------------|---|
| <i>Elaenia flavogaster Acnistus arborescens</i>        | 17.53 | -0.239 | low | Plant-skewed | 1 |
| <i>Euphonia pectoralis Rhipsalis sp</i>                | 17.51 | 0.548  | low | Bird-skewed  | 2 |
| <i>Tolmomyias sulphurescens Miconia cinnamomifolia</i> | 17.43 | 0.919  | low | Bird-skewed  | 1 |
| <i>Celeus flavescens Miconia budlejoides</i>           | 17.39 | 0.675  | low | Bird-skewed  | 1 |
| <i>Penelope obscura Myrcia pubipetala</i>              | 17.38 | 0.577  | low | Bird-skewed  | 1 |
| <i>Zonotrichia capensis Miconia sellowiana</i>         | 17.38 | 0.851  | low | Bird-skewed  | 1 |
| <i>Elaenia obscura Miconia chartacea</i>               | 17.33 | 0.667  | low | Bird-skewed  | 1 |
| <i>Pteroglossus bailloni Miconia discolor</i>          | 17.33 | 0.663  | low | Bird-skewed  | 1 |
| <i>Pitangus sulphuratus Miconia albicans</i>           | 17.29 | 0.628  | low | Bird-skewed  | 1 |
| <i>Tangara desmaresti Clusia criuva</i>                | 17.28 | -0.833 | low | Plant-skewed | 1 |
| <i>Penelope obscura Ficus luschnathiana</i>            | 17.27 | 0.586  | low | Bird-skewed  | 1 |
| <i>Pipra pipra Guarea guidonia</i>                     | 17.26 | -0.166 | low | Plant-skewed | 1 |
| <i>Chlorophonia cyanea Miconia sellowiana</i>          | 17.23 | 0.849  | low | Bird-skewed  | 1 |
| <i>Mionectes rufiventris Miconia theizans</i>          | 17.23 | 0.577  | low | Bird-skewed  | 1 |
| <i>Pteroglossus bailloni Miconia budlejoides</i>       | 17.23 | 0.671  | low | Bird-skewed  | 1 |
| <i>Turdus leucomelas Nectandra lanceolata</i>          | 17.21 | -0.564 | low | Plant-skewed | 1 |
| <i>Euphonia pectoralis Miconia theizans</i>            | 17.19 | 0.575  | low | Bird-skewed  | 1 |
| <i>Pteroglossus bailloni Miconia racemifera</i>        | 17.18 | 0.674  | low | Bird-skewed  | 1 |
| <i>Penelope superciliaris Myrcia ilheosensis</i>       | 17.14 | 0.646  | low | Bird-skewed  | 1 |
| <i>Euphonia pectoralis Ficus luschnathiana</i>         | 17.12 | 0.581  | low | Bird-skewed  | 1 |
| <i>Lipaugus lanioides Amaioua intermedia</i>           | 17.10 | 0.281  | low | Bird-skewed  | 1 |
| <i>Lipaugus lanioides Amaioua guianensis</i>           | 17.10 | 0.281  | low | Bird-skewed  | 1 |
| <i>Dacnis cayana Acnistus arborescens</i>              | 17.07 | -0.284 | low | Plant-skewed | 1 |
| <i>Euphonia violacea Rhipsalis sp</i>                  | 17.05 | 0.530  | low | Bird-skewed  | 1 |
| <i>Pteroglossus bailloni Leandra variabilis</i>        | 17.00 | 0.688  | low | Bird-skewed  | 1 |
| <i>Turdus albicollis Guarea macrophylla</i>            | 16.99 | -0.194 | low | Plant-skewed | 1 |
| <i>Elaenia flavogaster Guarea guidonia</i>             | 16.98 | -0.195 | low | Plant-skewed | 1 |
| <i>Turdus amaurochalinus Myrciaria cuspidata</i>       | 16.97 | 0.528  | low | Bird-skewed  | 1 |
| <i>Euphonia violacea Rhipsalis paradoxa</i>            | 16.94 | 0.540  | low | Bird-skewed  | 1 |
| <i>Thraupis sayaca Ixora burchelliana</i>              | 16.94 | -0.804 | low | Plant-skewed | 1 |

|                                                      |       |        |     |              |   |
|------------------------------------------------------|-------|--------|-----|--------------|---|
| <i>Cissopis leverianus Vassobia breviflora</i>       | 16.87 | -0.305 | low | Plant-skewed | 1 |
| <i>Pitangus sulphuratus Eugenia uruguayensis</i>     | 16.82 | 0.665  | low | Bird-skewed  | 1 |
| <i>Elaenia obscura Eugenia astringens</i>            | 16.80 | 0.708  | low | Bird-skewed  | 1 |
| <i>Manacus manacus Myrcia splendens</i>              | 16.74 | 0.807  | low | Bird-skewed  | 1 |
| <i>Turdus albicollis Psychotria nuda</i>             | 16.73 | -0.170 | low | Plant-skewed | 1 |
| <i>Turdus albicollis Psychotria vellosiana</i>       | 16.69 | -0.167 | low | Plant-skewed | 1 |
| <i>Saltator fuliginosus Psychotria suterella</i>     | 16.58 | -0.146 | low | Plant-skewed | 1 |
| <i>Icterus cayanensis Plinia cauliflora</i>          | 16.56 | 0.813  | low | Bird-skewed  | 1 |
| <i>Penelope obscura Miconia chartacea</i>            | 16.54 | 0.646  | low | Bird-skewed  | 1 |
| <i>Turdus albicollis Psychotria suterella</i>        | 16.53 | -0.152 | low | Plant-skewed | 1 |
| <i>Dacnis cayana Guarea guidonia</i>                 | 16.53 | -0.243 | low | Plant-skewed | 1 |
| <i>Manacus manacus Paullinia rhomboidea</i>          | 16.53 | 0.822  | low | Bird-skewed  | 1 |
| <i>Turdus albicollis Psychotria sp</i>               | 16.52 | -0.151 | low | Plant-skewed | 1 |
| <i>Thraupis cyanoptera Nectandra membranacea</i>     | 16.49 | -0.651 | low | Plant-skewed | 1 |
| <i>Euphonia pectoralis Miconia latecrenata</i>       | 16.47 | 0.634  | low | Bird-skewed  | 1 |
| <i>Orthogonys chloricterus Rudgea jasminoides</i>    | 16.41 | 0.128  | low | Bird-skewed  | 1 |
| <i>Pitangus sulphuratus Eugenia astringens</i>       | 16.40 | 0.699  | low | Bird-skewed  | 1 |
| <i>Mionectes rufiventris Miconia budlejoides</i>     | 16.38 | 0.647  | low | Bird-skewed  | 1 |
| <i>Mionectes rufiventris Miconia racemifera</i>      | 16.33 | 0.651  | low | Bird-skewed  | 2 |
| <i>Euphonia pectoralis Leandra australis</i>         | 16.31 | 0.648  | low | Bird-skewed  | 1 |
| <i>Trichothraupis melanops Psychotria vellosiana</i> | 16.30 | -0.210 | low | Plant-skewed | 1 |
| <i>Euphonia violacea Miconia albicans</i>            | 16.29 | 0.596  | low | Bird-skewed  | 1 |
| <i>Mionectes rufiventris Miconia tristis</i>         | 16.28 | 0.655  | low | Bird-skewed  | 1 |
| <i>Volatinia jacarina Miconia rubiginosa</i>         | 16.24 | 0.569  | low | Bird-skewed  | 1 |
| <i>Manacus manacus Myrcia hebeptala</i>              | 16.22 | 0.844  | low | Bird-skewed  | 1 |
| <i>Turdus amaurochalinus Miconia albicans</i>        | 16.22 | 0.593  | low | Bird-skewed  | 1 |
| <i>Turdus albicollis Palicourea forsteronioides</i>  | 16.21 | -0.120 | low | Plant-skewed | 1 |
| <i>Euphonia pectoralis Miconia pusilliflora</i>      | 16.18 | 0.658  | low | Bird-skewed  | 1 |
| <i>Tijuca atra Miconia sellowiana</i>                | 16.18 | 0.838  | low | Bird-skewed  | 1 |
| <i>Euphonia pectoralis Leandra variabilis</i>        | 16.11 | 0.665  | low | Bird-skewed  | 1 |
| <i>Myiodynastes maculatus Ficus luschnathiana</i>    | 16.07 | 0.540  | low | Bird-skewed  | 1 |

|                                                           |       |        |     |              |   |
|-----------------------------------------------------------|-------|--------|-----|--------------|---|
| <i>Parula pitiayumi Miconia racemifera</i>                | 16.05 | 0.643  | low | Bird-skewed  | 1 |
| <i>Nemosia pileata Solanum mauritianum</i>                | 16.03 | 0.774  | low | Bird-skewed  | 1 |
| <i>Euphonia pectoralis Leandra sp</i>                     | 16.01 | 0.673  | low | Bird-skewed  | 1 |
| <i>Penelope obscura Leandra melastomoides</i>             | 15.96 | 0.693  | low | Bird-skewed  | 1 |
| <i>Penelope obscura Solanum bullatum</i>                  | 15.95 | 0.694  | low | Bird-skewed  | 1 |
| <i>Penelope obscura Eugenia melanogyna</i>                | 15.95 | 0.694  | low | Bird-skewed  | 1 |
| <i>Euphonia pectoralis Leandra sabiaensis</i>             | 15.95 | 0.678  | low | Bird-skewed  | 1 |
| <i>Euphonia pectoralis Leandra refracta</i>               | 15.95 | 0.678  | low | Bird-skewed  | 1 |
| <i>Penelope obscura Eugenia mosenii</i>                   | 15.95 | 0.694  | low | Bird-skewed  | 1 |
| <i>Penelope obscura Solanum variabile</i>                 | 15.93 | 0.695  | low | Bird-skewed  | 1 |
| <i>Orthogonys chloricterus Amaioua intermedia</i>         | 15.92 | 0.184  | low | Bird-skewed  | 1 |
| <i>Pteroglossus bailloni Solanum mauritianum</i>          | 15.92 | 0.772  | low | Bird-skewed  | 1 |
| <i>Haplospiza unicolor Miconia theizans</i>               | 15.86 | 0.523  | low | Bird-skewed  | 1 |
| <i>Turdus amaurochalinus Miconia chartacea</i>            | 15.85 | 0.625  | low | Bird-skewed  | 1 |
| <i>Celeus flavescens Myrcia splendens</i>                 | 15.84 | 0.793  | low | Bird-skewed  | 1 |
| <i>Euphonia pectoralis Leandra pilonensis</i>             | 15.83 | 0.688  | low | Bird-skewed  | 1 |
| <i>Penelope obscura Nectandra cuspidata</i>               | 15.81 | 0.705  | low | Bird-skewed  | 1 |
| <i>Trichothraupis melanops Palicourea forsteronioides</i> | 15.81 | -0.166 | low | Plant-skewed | 1 |
| <i>Euphonia pectoralis Ossaea amygdaloides</i>            | 15.80 | 0.690  | low | Bird-skewed  | 1 |
| <i>Nemosia pileata Myrcia splendens</i>                   | 15.79 | 0.793  | low | Bird-skewed  | 1 |
| <i>Turdus amaurochalinus Eugenia uruguayensis</i>         | 15.74 | 0.634  | low | Bird-skewed  | 1 |
| <i>Tangara cyanocephala Allophylus edulis</i>             | 15.73 | -0.728 | low | Plant-skewed | 2 |
| <i>Turdus amaurochalinus Miconia tristis</i>              | 15.70 | 0.638  | low | Bird-skewed  | 1 |
| <i>Nemosia pileata Plinia cauliflora</i>                  | 15.68 | 0.800  | low | Bird-skewed  | 1 |
| <i>Turdus amaurochalinus Miconia pusilliflora</i>         | 15.65 | 0.642  | low | Bird-skewed  | 2 |
| <i>Turdus rufiventris Guarea macrophylla</i>              | 15.64 | -0.337 | low | Plant-skewed | 1 |
| <i>Tachyphonus coronatus Ilex microdonta</i>              | 15.63 | -0.449 | low | Plant-skewed | 1 |
| <i>Thraupis ornate Allophylus edulis</i>                  | 15.63 | -0.736 | low | Plant-skewed | 1 |
| <i>Parula pitiayumi Eugenia astringens</i>                | 15.62 | 0.679  | low | Bird-skewed  | 1 |
| <i>Lipaugus lanioides Miconia valtheri</i>                | 15.60 | 0.431  | low | Bird-skewed  | 1 |

|                                                         |       |        |     |              |   |
|---------------------------------------------------------|-------|--------|-----|--------------|---|
| <i>Celeus flavescens Paullinia uloptera</i>             | 15.56 | 0.814  | low | Bird-skewed  | 1 |
| <i>Turdus amaurochalinus Eugenia brasiliensis</i>       | 15.51 | 0.654  | low | Bird-skewed  | 1 |
| <i>Conirostrum speciosum Miconia tristis</i>            | 15.51 | 0.632  | low | Bird-skewed  | 1 |
| <i>Tachyphonus coronatus Acnistus arborescens</i>       | 15.50 | -0.442 | low | Plant-skewed | 1 |
| <i>Tachyphonus coronatus Vassobia breviflora</i>        | 15.50 | -0.442 | low | Plant-skewed | 1 |
| <i>Thraupis ornate Nectandra membranacea</i>            | 15.49 | -0.733 | low | Plant-skewed | 1 |
| <i>Euphonia chalybea Miconia pusilliflora</i>           | 15.48 | 0.637  | low | Bird-skewed  | 1 |
| <i>Manacus manacus Miconia prasina</i>                  | 15.46 | 0.898  | low | Bird-skewed  | 1 |
| <i>Attila phoenicurus Miconia tristis</i>               | 15.42 | 0.629  | low | Bird-skewed  | 1 |
| <i>Turdus rufiventris Psychotria vellosiana</i>         | 15.34 | -0.316 | low | Plant-skewed | 1 |
| <i>Manacus manacus Miconia cinnamomifolia</i>           | 15.34 | 0.907  | low | Bird-skewed  | 1 |
| <i>Penelope obscura Psidium cattleianum</i>             | 15.33 | 0.745  | low | Bird-skewed  | 1 |
| <i>Thlypopsis sordida Myrcia tomentosa</i>              | 15.33 | 0.224  | low | Bird-skewed  | 1 |
| <i>Turdus amaurochalinus Eugenia astringens</i>         | 15.32 | 0.671  | low | Bird-skewed  | 1 |
| <i>Pitangus sulphuratus Myrcia splendens</i>            | 15.31 | 0.785  | low | Bird-skewed  | 1 |
| <i>Chiroxiphia caudate Guarea macrophylla</i>           | 15.26 | -0.378 | low | Plant-skewed | 2 |
| <i>Euphonia sp Rhipsalis sp</i>                         | 15.26 | 0.445  | low | Bird-skewed  | 1 |
| <i>Turdus albicollis Rudgea jasminoides</i>             | 15.23 | -0.008 | low | Plant-skewed | 2 |
| <i>Myiodynastes maculatus Miconia tristis</i>           | 15.18 | 0.621  | low | Bird-skewed  | 1 |
| <i>Thraupis sayaca Allophylus edulis</i>                | 15.15 | -0.775 | low | Plant-skewed | 1 |
| <i>Pteroglossus bailloni Myrcia brasiliensis</i>        | 15.15 | 0.831  | low | Bird-skewed  | 1 |
| <i>Conirostrum speciosum Solanum myrianthum</i>         | 15.14 | 0.664  | low | Bird-skewed  | 1 |
| <i>Pipraeidea melanonota Miconia pusilliflora</i>       | 15.13 | 0.626  | low | Bird-skewed  | 1 |
| <i>Stephanophorus diadematus Myrceugenia myrcioides</i> | 15.10 | 0.443  | low | Bird-skewed  | 1 |
| <i>Elaenia mesoleuca Psychotria vellosiana</i>          | 15.06 | -0.346 | low | Plant-skewed | 1 |
| <i>Lipaugus lanioides Ficus luschnathiana</i>           | 15.01 | 0.491  | low | Bird-skewed  | 1 |
| <i>Stephanophorus diadematus Myrcia oblongata</i>       | 15.00 | 0.453  | low | Bird-skewed  | 1 |
| <i>Ramphastos vitellinus Myrcia pubipetala</i>          | 15.00 | 0.475  | low | Bird-skewed  | 1 |
| <i>Tangara cayana Acnistus arborescens</i>              | 14.97 | -0.495 | low | Plant-skewed | 1 |
| <i>Chiroxiphia caudate Psychotria vellosiana</i>        | 14.96 | -0.357 | low | Plant-skewed | 2 |

|                                                       |       |        |     |              |   |
|-------------------------------------------------------|-------|--------|-----|--------------|---|
| <i>Penelope obscura Myrcia splendens</i>              | 14.93 | 0.778  | low | Bird-skewed  | 1 |
| <i>Ramphastos dicolorus Ficus luschnathiana</i>       | 14.91 | 0.486  | low | Bird-skewed  | 1 |
| <i>Haplospiza unicolor Miconia pusilliflora</i>       | 14.86 | 0.616  | low | Bird-skewed  | 1 |
| <i>Volatinia jacarina Solanum granulosoleprosum</i>   | 14.82 | 0.694  | low | Bird-skewed  | 1 |
| <i>Mionectes rufiventris Myrcia splendens</i>         | 14.82 | 0.776  | low | Bird-skewed  | 1 |
| <i>Chiroxiphia caudate Psychotria suterella</i>       | 14.80 | -0.346 | low | Plant-skewed | 1 |
| <i>Tachyphonus cristatus Miconia valtheri</i>         | 14.80 | 0.381  | low | Bird-skewed  | 1 |
| <i>Tyrannus melancholicus Acnistus arborescens</i>    | 14.79 | -0.513 | low | Plant-skewed | 1 |
| <i>Stephanophorus diadematus Ficus luschnathiana</i>  | 14.76 | 0.478  | low | Bird-skewed  | 1 |
| <i>Coereba flaveola Myrcia ferruginea</i>             | 14.74 | 0.477  | low | Bird-skewed  | 1 |
| <i>Coereba flaveola Ficus luschnathiana</i>           | 14.74 | 0.477  | low | Bird-skewed  | 1 |
| <i>Turdus albicollis Amaioua intermedia</i>           | 14.74 | 0.057  | low | Bird-skewed  | 1 |
| <i>Ramphastos vitellinus Myrcia strigipes</i>         | 14.72 | 0.503  | low | Bird-skewed  | 1 |
| <i>Ramphocelus carbo Acnistus arborescens</i>         | 14.71 | -0.522 | low | Plant-skewed | 1 |
| <i>Tachyphonus coronatus Psychotria vellosiana</i>    | 14.66 | -0.390 | low | Plant-skewed | 1 |
| <i>Pitangus sulphuratus Ocotea pulchella</i>          | 14.65 | 0.837  | low | Bird-skewed  | 2 |
| <i>Myiarchus ferox Guarea guidonia</i>                | 14.64 | -0.444 | low | Plant-skewed | 1 |
| <i>Turdus leucomelas Guarea macrophylla</i>           | 14.63 | -0.445 | low | Plant-skewed | 1 |
| <i>Turdus flavipes Amaioua intermedia</i>             | 14.61 | 0.041  | low | Bird-skewed  | 1 |
| <i>Myiodynastes maculatus Ocotea puberula</i>         | 14.61 | 0.673  | low | Bird-skewed  | 1 |
| <i>Pitangus sulphuratus Eugenia cerasiflora</i>       | 14.56 | 0.845  | low | Bird-skewed  | 1 |
| <i>Sicalis flaveola Eugenia astringens</i>            | 14.54 | 0.646  | low | Bird-skewed  | 1 |
| <i>Tachyphonus coronatus Psychotria suterella</i>     | 14.50 | -0.379 | low | Plant-skewed | 1 |
| <i>Penelope obscura Marlierea reitzii</i>             | 14.49 | 0.813  | low | Bird-skewed  | 1 |
| <i>Tangara desmaresti Struthanthus martianus</i>      | 14.46 | -0.794 | low | Plant-skewed | 1 |
| <i>Celeus flavescens Miconia cinnamomifolia</i>       | 14.43 | 0.900  | low | Bird-skewed  | 1 |
| <i>Euphonia pectoralis Paullinia sp</i>               | 14.43 | 0.804  | low | Bird-skewed  | 1 |
| <i>Orthogonys chloricterus Miconia valtheri</i>       | 14.43 | 0.355  | low | Bird-skewed  | 1 |
| <i>Basileuterus culicivorus Miconia tentaculifera</i> | 14.42 | 0.491  | low | Bird-skewed  | 1 |
| <i>Penelope obscura Myrcia brasiliensis</i>           | 14.40 | 0.821  | low | Bird-skewed  | 1 |

|                                                      |       |        |     |              |   |
|------------------------------------------------------|-------|--------|-----|--------------|---|
| <i>Penelope obscura Myrcia hebeptala</i>             | 14.40 | 0.821  | low | Bird-skewed  | 1 |
| <i>Cacicus haemorrhous Miconia valtheri</i>          | 14.38 | 0.351  | low | Bird-skewed  | 1 |
| <i>Pteroglossus bailloni Miconia cabucu</i>          | 14.34 | 0.893  | low | Bird-skewed  | 1 |
| <i>Thraupis cyanoptera Ilex microdonta</i>           | 14.34 | -0.577 | low | Plant-skewed | 1 |
| <i>Turdus leucomelas Psychotria vellosiana</i>       | 14.33 | -0.427 | low | Plant-skewed | 1 |
| <i>Capsiempis flaveola Miconia cinnamomifolia</i>    | 14.32 | 0.899  | low | Bird-skewed  | 1 |
| <i>Elaenia obscura Miconia cinnamomifolia</i>        | 14.31 | 0.899  | low | Bird-skewed  | 1 |
| <i>Chiroxiphia caudate Psychotria leiocarpa</i>      | 14.30 | -0.307 | low | Plant-skewed | 1 |
| <i>Euphonia chlorotica Miconia tristis</i>           | 14.29 | 0.587  | low | Bird-skewed  | 1 |
| <i>Pteroglossus bailloni Miconia cinnamomifolia</i>  | 14.27 | 0.899  | low | Bird-skewed  | 2 |
| <i>Tyrannus savana Guarea guidonia</i>               | 14.25 | -0.485 | low | Plant-skewed | 1 |
| <i>Tyrannus melancholicus Guarea guidonia</i>        | 14.25 | -0.485 | low | Plant-skewed | 2 |
| <i>Euphonia pectoralis Myrcia brasiliensis</i>       | 14.25 | 0.819  | low | Bird-skewed  | 1 |
| <i>Lipaugus lanioides Miconia budlejoides</i>        | 14.21 | 0.571  | low | Bird-skewed  | 1 |
| <i>Lipaugus lanioides Miconia racemifera</i>         | 14.17 | 0.575  | low | Bird-skewed  | 1 |
| <i>Ramphocelus bresilius Guarea guidonia</i>         | 14.17 | -0.494 | low | Plant-skewed | 1 |
| <i>Saltator maximus Miconia albicans</i>             | 14.11 | 0.502  | low | Bird-skewed  | 1 |
| <i>Antilophia galeata Miconia rubiginosa</i>         | 14.09 | 0.469  | low | Bird-skewed  | 1 |
| <i>Stephanophorus diadematus Miconia chartacea</i>   | 14.02 | 0.554  | low | Bird-skewed  | 2 |
| <i>Ramphastos dicolorus Miconia tristis</i>          | 14.02 | 0.576  | low | Bird-skewed  | 1 |
| <i>Lipaugus lanioides Leandra variabilis</i>         | 13.99 | 0.594  | low | Bird-skewed  | 1 |
| <i>Pipraeidea melanonota Solanum mauritianum</i>     | 13.97 | 0.731  | low | Bird-skewed  | 1 |
| <i>Stephanophorus diadematus Miconia budlejoides</i> | 13.97 | 0.560  | low | Bird-skewed  | 1 |
| <i>Pitangus sulphuratus Miconia cinnamomifolia</i>   | 13.91 | 0.896  | low | Bird-skewed  | 1 |
| <i>Euphonia violacea Marlierea obscura</i>           | 13.90 | 0.802  | low | Bird-skewed  | 1 |
| <i>Penelope obscura Campomanesia xanthocarpa</i>     | 13.86 | 0.865  | low | Bird-skewed  | 1 |
| <i>Coereba flaveola Miconia tristis</i>              | 13.86 | 0.569  | low | Bird-skewed  | 1 |
| <i>Tachyphonus cristatus Miconia albicans</i>        | 13.83 | 0.487  | low | Bird-skewed  | 1 |
| <i>Stephanophorus diadematus Miconia</i>             | 13.82 | 0.575  | low | Bird-skewed  | 2 |

*pusilliflora*

|                                                      |       |        |     |              |   |
|------------------------------------------------------|-------|--------|-----|--------------|---|
| <i>Phyllomyias fasciatus Miconia sellowiana</i>      | 13.81 | 0.804  | low | Bird-skewed  | 1 |
| <i>Cacicus haemorrhous Ficus luschnathiana</i>       | 13.78 | 0.420  | low | Bird-skewed  | 1 |
| <i>Turdus amaurochalinus Miconia sellowiana</i>      | 13.78 | 0.804  | low | Bird-skewed  | 1 |
| <i>Stephanophorus diadematus Solanum inodorum</i>    | 13.75 | 0.582  | low | Bird-skewed  | 1 |
| <i>Myiozetetes similis Miconia rubiginosa</i>        | 13.73 | 0.447  | low | Bird-skewed  | 1 |
| <i>Myiodynastes maculatus Myrcia splendens</i>       | 13.72 | 0.754  | low | Bird-skewed  | 1 |
| <i>Tangara seledon Psychotria vellosiana</i>         | 13.70 | -0.496 | low | Plant-skewed | 1 |
| <i>Lipaugus lanioides Solanum swartzianum</i>        | 13.65 | 0.628  | low | Bird-skewed  | 1 |
| <i>Cacicus haemorrhous Miconia paniculata</i>        | 13.64 | 0.437  | low | Bird-skewed  | 1 |
| <i>Elaenia sp Myrcia palustris</i>                   | 13.61 | 0.293  | low | Bird-skewed  | 1 |
| <i>Turdus amaurochalinus Ocotea pulchella</i>        | 13.57 | 0.822  | low | Bird-skewed  | 2 |
| <i>Lipaugus lanioides Eugenia sp</i>                 | 13.56 | 0.637  | low | Bird-skewed  | 1 |
| <i>Tachyphonus cristatus Miconia latecrenata</i>     | 13.55 | 0.517  | low | Bird-skewed  | 1 |
| <i>Myiozetetes similis Miconia albicans</i>          | 13.54 | 0.470  | low | Bird-skewed  | 2 |
| <i>Megarynchus pitangua Ocotea puberula</i>          | 13.53 | 0.638  | low | Bird-skewed  | 1 |
| <i>Stephanophorus diadematus Solanum didymum</i>     | 13.53 | 0.605  | low | Bird-skewed  | 1 |
| <i>Thlypopsis sordida Miconia rubiginosa</i>         | 13.52 | 0.434  | low | Bird-skewed  | 1 |
| <i>Penelope obscura Miconia cinnamomifolia</i>       | 13.52 | 0.893  | low | Bird-skewed  | 1 |
| <i>Chiroxiphia caudate Rudgea jasminoides</i>        | 13.50 | -0.234 | low | Plant-skewed | 1 |
| <i>Orchesticus abeillei Miconia budlejoides</i>      | 13.49 | 0.537  | low | Bird-skewed  | 1 |
| <i>Turdus flavipes Rhipsalis camposportoana</i>      | 13.48 | 0.192  | low | Bird-skewed  | 1 |
| <i>Turdus amaurochalinus Eugenia uniflora</i>        | 13.48 | 0.831  | low | Bird-skewed  | 1 |
| <i>Empidonomus varius Miconia rubiginosa</i>         | 13.44 | 0.428  | low | Bird-skewed  | 1 |
| <i>Stephanophorus diadematus Ossaea amygdaloides</i> | 13.43 | 0.615  | low | Bird-skewed  | 1 |
| <i>Stephanophorus diadematus Solanum variabile</i>   | 13.42 | 0.616  | low | Bird-skewed  | 1 |
| <i>Cacicus haemorrhous Miconia albicans</i>          | 13.42 | 0.462  | low | Bird-skewed  | 1 |
| <i>Saltator similis Rudgea jasminoides</i>           | 13.40 | -0.248 | low | Plant-skewed | 1 |



|                                                       |       |        |     |              |   |
|-------------------------------------------------------|-------|--------|-----|--------------|---|
| <i>Euphonia pectoralis Miconia cinnamomifolia</i>     | 13.37 | 0.892  | low | Bird-skewed  | 1 |
| <i>Thraupis cyanoptera Psychotria vellosiana</i>      | 13.37 | -0.532 | low | Plant-skewed | 1 |
| <i>Tachyphonus cristatus Miconia racemifera</i>       | 13.36 | 0.538  | low | Bird-skewed  | 1 |
| <i>Thraupis ornate Ilex microdonta</i>                | 13.33 | -0.677 | low | Plant-skewed | 1 |
| <i>Trichothraupis melanops Psychotria gracilentia</i> | 13.33 | 0.146  | low | Bird-skewed  | 1 |
| <i>Pipraeidea melanonota Miconia sellowiana</i>       | 13.27 | 0.795  | low | Bird-skewed  | 1 |
| <i>Orchesticus abeillei Leandra variabilis</i>        | 13.26 | 0.562  | low | Bird-skewed  | 1 |
| <i>Turdus albicollis Miconia valtheri</i>             | 13.24 | 0.254  | low | Bird-skewed  | 1 |
| <i>Tersina viridis Miconia tristis</i>                | 13.21 | 0.538  | low | Bird-skewed  | 1 |
| <i>Orthogonys chloricterus Miconia latecrenata</i>    | 13.18 | 0.497  | low | Bird-skewed  | 1 |
| <i>Tachyphonus cristatus Leandra sp</i>               | 13.09 | 0.568  | low | Bird-skewed  | 1 |
| <i>Turdus albicollis Myrcia spectabilis</i>           | 13.07 | 0.277  | low | Bird-skewed  | 2 |
| <i>Myiodynastes maculatus Ocotea pulchella</i>        | 13.06 | 0.814  | low | Bird-skewed  | 1 |
| <i>Orthogonys chloricterus Miconia budlejoides</i>    | 13.04 | 0.513  | low | Bird-skewed  | 1 |
| <i>Euphonia violacea Miconia prasina</i>              | 13.03 | 0.877  | low | Bird-skewed  | 1 |
| <i>Orthogonys chloricterus Miconia brasiliensis</i>   | 13.03 | 0.514  | low | Bird-skewed  | 1 |
| <i>Chiroxiphia caudate Amaioua intermedia</i>         | 13.01 | -0.182 | low | Plant-skewed | 1 |
| <i>Turdus amaurochalinus Miconia prasina</i>          | 12.96 | 0.876  | low | Bird-skewed  | 1 |
| <i>Ramphastos vitellinus Psidium cattleianum</i>      | 12.95 | 0.683  | low | Bird-skewed  | 1 |
| <i>Trichothraupis melanops Rhipsalis teres</i>        | 12.94 | 0.200  | low | Bird-skewed  | 1 |
| <i>Trichothraupis melanops Solanum americanum</i>     | 12.91 | 0.204  | low | Bird-skewed  | 1 |
| <i>Euphonia violacea Miconia cinnamomifolia</i>       | 12.91 | 0.887  | low | Bird-skewed  | 1 |
| <i>Orthogonys chloricterus Miconia pusilliflora</i>   | 12.89 | 0.530  | low | Bird-skewed  | 1 |
| <i>Turdus albicollis Myrcia pulchra</i>               | 12.88 | 0.301  | low | Bird-skewed  | 1 |
| <i>Trichothraupis melanops Miconia valtheri</i>       | 12.85 | 0.213  | low | Bird-skewed  | 1 |
| <i>Cacicus chrysopterus Miconia pusilliflora</i>      | 12.85 | 0.528  | low | Bird-skewed  | 1 |
| <i>Turdus amaurochalinus Miconia cinnamomifolia</i>   | 12.83 | 0.886  | low | Bird-skewed  | 3 |
| <i>Turdus flavipes Myrcia pulchra</i>                 | 12.76 | 0.289  | low | Bird-skewed  | 1 |
| <i>Turdus albicollis Myrcia pubipetala</i>            | 12.75 | 0.319  | low | Bird-skewed  | 2 |
| <i>Cyanerpes cyaneus Myrcia splendens</i>             | 12.75 | 0.730  | low | Bird-skewed  | 1 |

|                                                      |       |        |     |              |   |
|------------------------------------------------------|-------|--------|-----|--------------|---|
| <i>Thraupis sayaca Acnistus arborescens</i>          | 12.73 | -0.721 | low | Plant-skewed | 1 |
| <i>Empidonomus varius Miconia tristis</i>            | 12.73 | 0.512  | low | Bird-skewed  | 1 |
| <i>Orthogonys chloricterus Leandra sp</i>            | 12.72 | 0.550  | low | Bird-skewed  | 1 |
| <i>Thraupis cyanoptera Psychotria leiocarpa</i>      | 12.71 | -0.495 | low | Plant-skewed | 1 |
| <i>Turdus albicollis Miconia theizans</i>            | 12.71 | 0.325  | low | Bird-skewed  | 1 |
| <i>Stephanophorus diadematus Solanum mauritianum</i> | 12.66 | 0.695  | low | Bird-skewed  | 1 |
| <i>Turdus albicollis Myrcia ferruginea</i>           | 12.65 | 0.333  | low | Bird-skewed  | 1 |
| <i>Turdus albicollis Ficus luschnathiana</i>         | 12.65 | 0.333  | low | Bird-skewed  | 1 |
| <i>Myiozetetes similis Eugenia astringens</i>        | 12.64 | 0.571  | low | Bird-skewed  | 1 |
| <i>Conirostrum speciosum Miconia cinnamomifolia</i>  | 12.64 | 0.885  | low | Bird-skewed  | 1 |
| <i>Thlypopsis sordida Eugenia brasiliensis</i>       | 12.62 | 0.538  | low | Bird-skewed  | 1 |
| <i>Cissopis leverianus Miconia valtheri</i>          | 12.57 | 0.182  | low | Bird-skewed  | 1 |
| <i>Ramphastos dicolorus Myrcia splendens</i>         | 12.56 | 0.725  | low | Bird-skewed  | 1 |
| <i>Tangara desmaresti Ilex microdonta</i>            | 12.55 | -0.754 | low | Plant-skewed | 1 |
| <i>Pipra rubrocapilla Miconia albicans</i>           | 12.54 | 0.402  | low | Bird-skewed  | 1 |
| <i>Turdus flavipes Ficus luschnathiana</i>           | 12.52 | 0.321  | low | Bird-skewed  | 1 |
| <i>Saltator maxillosus Miconia chartacea</i>         | 12.47 | 0.469  | low | Bird-skewed  | 1 |
| <i>Saltator similis Myrcia tomentosa</i>             | 12.45 | -0.141 | low | Plant-skewed | 1 |
| <i>Coereba flaveola Myrcia splendens</i>             | 12.39 | 0.720  | low | Bird-skewed  | 3 |
| <i>Turdus albicollis Myrcia anacardiifolia</i>       | 12.33 | 0.375  | low | Bird-skewed  | 1 |
| <i>Trichothraupis melanops Miconia theizans</i>      | 12.31 | 0.288  | low | Bird-skewed  | 1 |
| <i>Coereba flaveola Plinia cauliflora</i>            | 12.29 | 0.731  | low | Bird-skewed  | 1 |
| <i>Trichothraupis melanops Miconia inconspicua</i>   | 12.28 | 0.293  | low | Bird-skewed  | 1 |
| <i>Turdus albicollis Miconia albicans</i>            | 12.28 | 0.381  | low | Bird-skewed  | 1 |
| <i>Elaenia flavogaster Miconia albicans</i>          | 12.27 | 0.381  | low | Bird-skewed  | 1 |
| <i>Saltator maxillosus Miconia pusilliflora</i>      | 12.27 | 0.494  | low | Bird-skewed  | 1 |
| <i>Turdus amaurochalinus Miconia ligustroides</i>    | 12.26 | 0.936  | low | Bird-skewed  | 1 |
| <i>Tangara cyanocephala Psychotria mapourioides</i>  | 12.20 | -0.619 | low | Plant-skewed | 1 |

|                                                        |       |        |     |              |   |
|--------------------------------------------------------|-------|--------|-----|--------------|---|
| <i>Turdus albicollis Miconia sp</i>                    | 12.19 | 0.394  | low | Bird-skewed  | 1 |
| <i>Dacnis cayana Myrcia ferruginea</i>                 | 12.18 | 0.289  | low | Bird-skewed  | 1 |
| <i>Thraupis episcopus Guarea guidonia</i>              | 12.18 | -0.706 | low | Plant-skewed | 1 |
| <i>Elaenia sp Miconia tristis</i>                      | 12.15 | 0.476  | low | Bird-skewed  | 1 |
| <i>Turdus flavipes Miconia albicans</i>                | 12.15 | 0.371  | low | Bird-skewed  | 1 |
| <i>Lipaugus lanioides Myrcia brasiliensis</i>          | 12.13 | 0.780  | low | Bird-skewed  | 1 |
| <i>Saltator maximus Myrcia splendens</i>               | 12.13 | 0.712  | low | Bird-skewed  | 2 |
| <i>Thraupis ornate Psychotria mapourioides</i>         | 12.09 | -0.631 | low | Plant-skewed | 1 |
| <i>Tangara cyanocephala Psychotria sessilis</i>        | 12.07 | -0.613 | low | Plant-skewed | 1 |
| <i>Turdus albicollis Myrcia ilheosensis</i>            | 12.06 | 0.410  | low | Bird-skewed  | 2 |
| <i>Trichothraupis melanops Miconia tentaculifera</i>   | 12.06 | 0.324  | low | Bird-skewed  | 1 |
| <i>Ramphastos dicolorus Myrcia brasiliensis</i>        | 12.03 | 0.778  | low | Bird-skewed  | 1 |
| <i>Dacnis cayana Miconia rubiginosa</i>                | 12.01 | 0.313  | low | Bird-skewed  | 1 |
| <i>Poospiza lateralis Leandra sp</i>                   | 12.00 | 0.510  | low | Bird-skewed  | 1 |
| <i>Chiroxiphia caudate Psychotria gracilentia</i>      | 11.99 | -0.046 | low | Plant-skewed | 1 |
| <i>Tangara cyanocephala Palicourea forsteronioides</i> | 11.99 | -0.609 | low | Plant-skewed | 1 |
| <i>Dacnis cayana Miconia tentaculifera</i>             | 11.98 | 0.317  | low | Bird-skewed  | 1 |
| <i>Stephanophorus diadematus Miconia sellowiana</i>    | 11.96 | 0.767  | low | Bird-skewed  | 1 |
| <i>Ramphastos dicolorus Ocotea spixiana</i>            | 11.90 | 0.792  | low | Bird-skewed  | 1 |
| <i>Turdus rufiventris Miconia valtheri</i>             | 11.89 | 0.092  | low | Bird-skewed  | 1 |
| <i>Trichothraupis melanops Miconia albicans</i>        | 11.88 | 0.347  | low | Bird-skewed  | 1 |
| <i>Ramphastos vitellinus Ocotea pulchella</i>          | 11.88 | 0.792  | low | Bird-skewed  | 1 |
| <i>Turdus rufiventris Myrcia palustris</i>             | 11.87 | 0.096  | low | Bird-skewed  | 1 |
| <i>Turdus albicollis Miconia budlejoides</i>           | 11.85 | 0.437  | low | Bird-skewed  | 1 |
| <i>Tachyphonus cristatus Myrcia splendens</i>          | 11.85 | 0.703  | low | Bird-skewed  | 1 |
| <i>Dacnis cayana Miconia albicans</i>                  | 11.81 | 0.341  | low | Bird-skewed  | 2 |
| <i>Turdus albicollis Miconia racemifera</i>            | 11.81 | 0.443  | low | Bird-skewed  | 2 |
| <i>Turdus albicollis Leandra acutiflora</i>            | 11.81 | 0.443  | low | Bird-skewed  | 1 |
| <i>Machaeropterus regulus Miconia prasina</i>          | 11.80 | 0.862  | low | Bird-skewed  | 1 |

|                                                      |       |        |     |              |   |
|------------------------------------------------------|-------|--------|-----|--------------|---|
| <i>Turdus flavipes Miconia chartacea</i>             | 11.78 | 0.420  | low | Bird-skewed  | 1 |
| <i>Turdus albicollis Miconia tristis</i>             | 11.76 | 0.450  | low | Bird-skewed  | 1 |
| <i>Elaenia flavogaster Miconia tristis</i>           | 11.75 | 0.449  | low | Bird-skewed  | 1 |
| <i>Tangara cayana Myrcia tomentosa</i>               | 11.72 | -0.250 | low | Plant-skewed | 1 |
| <i>Turdus albicollis Miconia pusilliflora</i>        | 11.71 | 0.457  | low | Bird-skewed  | 1 |
| <i>Tachyphonus coronatus Psychotria gracilentia</i>  | 11.69 | -0.095 | low | Plant-skewed | 1 |
| <i>Turdus flavipes Miconia racemifera</i>            | 11.68 | 0.433  | low | Bird-skewed  | 1 |
| <i>Turdus rufiventris Myrciaria cuspidata</i>        | 11.68 | 0.127  | low | Bird-skewed  | 1 |
| <i>Machaeropterus regulus Miconia cinnamomifolia</i> | 11.67 | 0.874  | low | Bird-skewed  | 1 |
| <i>Turdus rufiventris Myrceugenia myrcioides</i>     | 11.63 | 0.134  | low | Bird-skewed  | 1 |
| <i>Turdus flavipes Miconia tristis</i>               | 11.63 | 0.440  | low | Bird-skewed  | 1 |
| <i>Turdus albicollis Leandra variabilis</i>          | 11.63 | 0.467  | low | Bird-skewed  | 1 |
| <i>Trichothraupis melanops Miconia latecrenata</i>   | 11.60 | 0.387  | low | Bird-skewed  | 1 |
| <i>Turdus flavipes Miconia pusilliflora</i>          | 11.58 | 0.447  | low | Bird-skewed  | 2 |
| <i>Chiroxiphia caudate Solanum americanum</i>        | 11.58 | 0.023  | low | Bird-skewed  | 1 |
| <i>Trichothraupis melanops Miconia discolor</i>      | 11.56 | 0.392  | low | Bird-skewed  | 1 |
| <i>Myiozetetes similis Myrcia splendens</i>          | 11.56 | 0.693  | low | Bird-skewed  | 1 |
| <i>Trichothraupis melanops Miconia chartacea</i>     | 11.52 | 0.398  | low | Bird-skewed  | 1 |
| <i>Chiroxiphia caudate Miconia valtheri</i>          | 11.51 | 0.034  | low | Bird-skewed  | 1 |
| <i>Ramphastos dicolorus Campomanesia guaviroba</i>   | 11.50 | 0.832  | low | Bird-skewed  | 1 |
| <i>Trichothraupis melanops Leandra regnellii</i>     | 11.49 | 0.403  | low | Bird-skewed  | 1 |
| <i>Ramphastos vitellinus Campomanesia guaviroba</i>  | 11.49 | 0.832  | low | Bird-skewed  | 1 |
| <i>Trichothraupis melanops Miconia budlejoides</i>   | 11.46 | 0.406  | low | Bird-skewed  | 2 |
| <i>Trichothraupis melanops Miconia brasiliensis</i>  | 11.45 | 0.407  | low | Bird-skewed  | 1 |
| <i>Trichothraupis melanops Leandra australis</i>     | 11.44 | 0.409  | low | Bird-skewed  | 1 |
| <i>Cacicus haemorrhous Myrcia splendens</i>          | 11.44 | 0.689  | low | Bird-skewed  | 1 |
| <i>Trichothraupis melanops Miconia racemifera</i>    | 11.42 | 0.412  | low | Bird-skewed  | 1 |
| <i>Trichothraupis melanops Leandra acutiflora</i>    | 11.42 | 0.413  | low | Bird-skewed  | 1 |

|                                                     |       |        |     |              |   |
|-----------------------------------------------------|-------|--------|-----|--------------|---|
| <i>Dacnis cayana Miconia budlejoides</i>            | 11.39 | 0.401  | low | Bird-skewed  | 1 |
| <i>Pteroglossus aracari Miconia cinnamomifolia</i>  | 11.38 | 0.870  | low | Bird-skewed  | 1 |
| <i>Turdus albicollis Eugenia astringens</i>         | 11.38 | 0.499  | low | Bird-skewed  | 1 |
| <i>Trichothraupis melanops Miconia tristis</i>      | 11.37 | 0.419  | low | Bird-skewed  | 2 |
| <i>Turdus rufiventris Miconia theizans</i>          | 11.36 | 0.178  | low | Bird-skewed  | 1 |
| <i>Turdus albicollis Leandra pilonensis</i>         | 11.35 | 0.503  | low | Bird-skewed  | 1 |
| <i>Dacnis cayana Miconia racemifera</i>             | 11.35 | 0.407  | low | Bird-skewed  | 1 |
| <i>Lipaugus lanioides Miconia cabucu</i>            | 11.33 | 0.861  | low | Bird-skewed  | 1 |
| <i>Turdus rufiventris Miconia inconspicua</i>       | 11.32 | 0.184  | low | Bird-skewed  | 1 |
| <i>Trichothraupis melanops Miconia pusilliflora</i> | 11.31 | 0.427  | low | Bird-skewed  | 2 |
| <i>Turdus rufiventris Myrcia ferruginea</i>         | 11.30 | 0.188  | low | Bird-skewed  | 1 |
| <i>Dacnis cayana Miconia tristis</i>                | 11.30 | 0.414  | low | Bird-skewed  | 1 |
| <i>Turdus rufiventris Ficus luschnathiana</i>       | 11.29 | 0.188  | low | Bird-skewed  | 1 |
| <i>Hemithraupis ruficapilla Miconia valtheri</i>    | 11.27 | -0.008 | low | Plant-skewed | 1 |
| <i>Turdus flavipes Eugenia astringens</i>           | 11.25 | 0.491  | low | Bird-skewed  | 1 |
| <i>Dacnis cayana Miconia pusilliflora</i>           | 11.24 | 0.421  | low | Bird-skewed  | 1 |
| <i>Megarynchus pitangua Miconia cinnamomifolia</i>  | 11.24 | 0.868  | low | Bird-skewed  | 1 |
| <i>Trichothraupis melanops Leandra variabilis</i>   | 11.23 | 0.438  | low | Bird-skewed  | 1 |
| <i>Ramphastos dicolorus Miconia cabucu</i>          | 11.23 | 0.859  | low | Bird-skewed  | 1 |
| <i>Cissopis leverianus Leandra regnellii</i>        | 11.21 | 0.379  | low | Bird-skewed  | 1 |
| <i>Cissopis leverianus Miconia budlejoides</i>      | 11.19 | 0.383  | low | Bird-skewed  | 1 |
| <i>Turdus albicollis Ocotea puberula</i>            | 11.19 | 0.525  | low | Bird-skewed  | 1 |
| <i>Trichothraupis melanops Leandra laevigata</i>    | 11.16 | 0.448  | low | Bird-skewed  | 1 |
| <i>Cnemotriccus fuscatus Miconia cinnamomifolia</i> | 11.16 | 0.867  | low | Bird-skewed  | 1 |
| <i>Cissopis leverianus Miconia racemifera</i>       | 11.14 | 0.389  | low | Bird-skewed  | 1 |
| <i>Trichothraupis melanops Leandra sp</i>           | 11.14 | 0.451  | low | Bird-skewed  | 1 |
| <i>Saltator fuliginosus Solanum rufescens</i>       | 11.14 | 0.541  | low | Bird-skewed  | 1 |
| <i>Tangara cyanoptera Miconia racemifera</i>        | 11.09 | 0.385  | low | Bird-skewed  | 1 |
| <i>Trichothraupis melanops Leandra refracta</i>     | 11.07 | 0.460  | low | Bird-skewed  | 1 |
| <i>Orthogonys chloricterus Marlierea obscura</i>    | 11.07 | 0.738  | low | Bird-skewed  | 1 |

|                                                      |       |        |     |              |   |
|------------------------------------------------------|-------|--------|-----|--------------|---|
| <i>Tangara cyanoptera Miconia tristis</i>            | 11.04 | 0.392  | low | Bird-skewed  | 1 |
| <i>Chiroxiphia caudate Myrcia pubipetala</i>         | 11.02 | 0.117  | low | Bird-skewed  | 1 |
| <i>Chiroxiphia caudate Miconia theizans</i>          | 10.98 | 0.125  | low | Bird-skewed  | 1 |
| <i>Poospiza thoracica Miconia sellowiana</i>         | 10.96 | 0.741  | low | Bird-skewed  | 1 |
| <i>Trichothraupis melanops Leandra pilonensis</i>    | 10.96 | 0.476  | low | Bird-skewed  | 1 |
| <i>Cissopis leverianus Leandra variabilis</i>        | 10.96 | 0.416  | low | Bird-skewed  | 1 |
| <i>Trichothraupis melanops Leandra melastomoides</i> | 10.94 | 0.479  | low | Bird-skewed  | 1 |
| <i>Trichothraupis melanops Ossaea amygdaloides</i>   | 10.93 | 0.481  | low | Bird-skewed  | 1 |
| <i>Chiroxiphia caudate Ficus luschnathiana</i>       | 10.91 | 0.136  | low | Bird-skewed  | 2 |
| <i>Knipolegus cyanirostris Miconia sellowiana</i>    | 10.88 | 0.738  | low | Bird-skewed  | 1 |
| <i>Knipolegus nigerrimus Miconia sellowiana</i>      | 10.88 | 0.738  | low | Bird-skewed  | 1 |
| <i>Saltator similis Miconia theizans</i>             | 10.87 | 0.109  | low | Bird-skewed  | 1 |
| <i>Saltator maximus Miconia prasina</i>              | 10.85 | 0.848  | low | Bird-skewed  | 1 |
| <i>Saltator similis Myrcia ferruginea</i>            | 10.81 | 0.120  | low | Bird-skewed  | 1 |
| <i>Chiroxiphia caudate Miconia paniculata</i>        | 10.77 | 0.161  | low | Bird-skewed  | 1 |
| <i>Cissopis leverianus Solanum didymum</i>           | 10.75 | 0.446  | low | Bird-skewed  | 1 |
| <i>Tangara seledon Psychotria gracilentia</i>        | 10.73 | -0.252 | low | Plant-skewed | 1 |
| <i>Saltator maximus Miconia cinnamomifolia</i>       | 10.73 | 0.861  | low | Bird-skewed  | 1 |
| <i>Chiroxiphia caudate Miconia tentaculifera</i>     | 10.72 | 0.169  | low | Bird-skewed  | 1 |
| <i>Trichothraupis melanops Leandra barbinervis</i>   | 10.70 | 0.512  | low | Bird-skewed  | 1 |
| <i>Elaenia sp Myrcia splendens</i>                   | 10.69 | 0.660  | low | Bird-skewed  | 1 |
| <i>Myiarchus tyrannulus Eugenia astringens</i>       | 10.63 | 0.444  | low | Bird-skewed  | 1 |
| <i>Tachyphonus coronatus Myrcia ferruginea</i>       | 10.62 | 0.088  | low | Bird-skewed  | 1 |
| <i>Saltator similis Miconia tentaculifera</i>        | 10.62 | 0.154  | low | Bird-skewed  | 1 |
| <i>Tachyphonus coronatus Ficus luschnathiana</i>     | 10.61 | 0.089  | low | Bird-skewed  | 1 |
| <i>Saltator fuliginosus Solanum mauritianum</i>      | 10.60 | 0.612  | low | Bird-skewed  | 1 |
| <i>Chiroxiphia caudate Myrcia anacardiifolia</i>     | 10.60 | 0.190  | low | Bird-skewed  | 1 |
| <i>Thlypopsis sordida Eugenia cerasiflora</i>        | 10.59 | 0.774  | low | Bird-skewed  | 1 |
| <i>Elaenia sp Calyptranthes concinna</i>             | 10.57 | 0.675  | low | Bird-skewed  | 1 |
| <i>Turdus rufiventris Miconia chartacea</i>          | 10.56 | 0.306  | low | Bird-skewed  | 1 |

|                                                     |       |        |     |              |   |
|-----------------------------------------------------|-------|--------|-----|--------------|---|
| <i>Pipra pipra Myrcia splendens</i>                 | 10.56 | 0.654  | low | Bird-skewed  | 1 |
| <i>Turdus sp Eugenia astringens</i>                 | 10.49 | 0.433  | low | Bird-skewed  | 1 |
| <i>Turdus rufiventris Miconia racemifera</i>        | 10.46 | 0.322  | low | Bird-skewed  | 1 |
| <i>Turdus rufiventris Eugenia uruguayensis</i>      | 10.45 | 0.324  | low | Bird-skewed  | 1 |
| <i>Tachyphonus cristatus Miconia cinnamomifolia</i> | 10.45 | 0.857  | low | Bird-skewed  | 2 |
| <i>Saltator similis Miconia albicans</i>            | 10.44 | 0.184  | low | Bird-skewed  | 1 |
| <i>Tachyphonus coronatus Miconia rubiginosa</i>     | 10.44 | 0.120  | low | Bird-skewed  | 1 |
| <i>Coereba flaveola Miconia ligustroides</i>        | 10.42 | 0.924  | low | Bird-skewed  | 1 |
| <i>Tachyphonus coronatus Miconia tentaculifera</i>  | 10.42 | 0.124  | low | Bird-skewed  | 1 |
| <i>Turdus rufiventris Miconia tristis</i>           | 10.41 | 0.330  | low | Bird-skewed  | 2 |
| <i>Saltator maxillosus Miconia sellowiana</i>       | 10.40 | 0.723  | low | Bird-skewed  | 1 |
| <i>Turdus rufiventris Miconia pusilliflora</i>      | 10.35 | 0.339  | low | Bird-skewed  | 2 |
| <i>Poospiza lateralis Miconia sellowiana</i>        | 10.31 | 0.720  | low | Bird-skewed  | 1 |
| <i>Turdus albicollis Myrcia splendens</i>           | 10.30 | 0.642  | low | Bird-skewed  | 2 |
| <i>Myiarchus ferox Myrcia ferruginea</i>            | 10.29 | 0.032  | low | Bird-skewed  | 1 |
| <i>Turdus rufiventris Solanum inodorum</i>          | 10.29 | 0.349  | low | Bird-skewed  | 1 |
| <i>Elaenia flavogaster Myrcia splendens</i>         | 10.29 | 0.642  | low | Bird-skewed  | 1 |
| <i>Tyrannus savana Myrciaria cuspidata</i>          | 10.29 | -0.110 | low | Plant-skewed | 1 |
| <i>Myiozetetes similis Miconia prasina</i>          | 10.28 | 0.838  | low | Bird-skewed  | 1 |
| <i>Turdus rufiventris Leandra variabilis</i>        | 10.27 | 0.352  | low | Bird-skewed  | 1 |
| <i>Chiroxiphia caudate Miconia latecrenata</i>      | 10.26 | 0.247  | low | Bird-skewed  | 1 |
| <i>Tangara peruviana Eugenia astringens</i>         | 10.26 | 0.413  | low | Bird-skewed  | 1 |
| <i>Tangara seledon Miconia valtheri</i>             | 10.25 | -0.189 | low | Plant-skewed | 1 |
| <i>Tachyphonus coronatus Miconia albicans</i>       | 10.25 | 0.155  | low | Bird-skewed  | 2 |
| <i>Chiroxiphia caudate Miconia discolor</i>         | 10.23 | 0.253  | low | Bird-skewed  | 2 |
| <i>Turdus rufiventris Leandra laevigata</i>         | 10.20 | 0.363  | low | Bird-skewed  | 1 |
| <i>Chiroxiphia caudate Miconia chartacea</i>        | 10.18 | 0.261  | low | Bird-skewed  | 1 |
| <i>Turdus albicollis Calypttranthes concinna</i>    | 10.18 | 0.658  | low | Bird-skewed  | 1 |
| <i>Turdus flavipes Myrcia splendens</i>             | 10.17 | 0.636  | low | Bird-skewed  | 1 |
| <i>Myiozetetes similis Miconia cinnamomifolia</i>   | 10.15 | 0.852  | low | Bird-skewed  | 1 |
| <i>Chiroxiphia caudate Leandra regnellii</i>        | 10.15 | 0.266  | low | Bird-skewed  | 1 |

|                                                      |       |        |     |              |   |
|------------------------------------------------------|-------|--------|-----|--------------|---|
| <i>Hemithraupis flavicollis Miconia albicans</i>     | 10.13 | 0.137  | low | Bird-skewed  | 1 |
| <i>Chiroxiphia caudate Miconia budlejoides</i>       | 10.12 | 0.271  | low | Bird-skewed  | 3 |
| <i>Chiroxiphia caudate Miconia brasiliensis</i>      | 10.12 | 0.272  | low | Bird-skewed  | 1 |
| <i>Turdus leucomelas Miconia rubiginosa</i>          | 10.11 | 0.064  | low | Bird-skewed  | 1 |
| <i>Cacicus haemorrhous Miconia cabucu</i>            | 10.11 | 0.841  | low | Bird-skewed  | 1 |
| <i>Chiroxiphia caudate Miconia racemifera</i>        | 10.08 | 0.278  | low | Bird-skewed  | 2 |
| <i>Turdus rufiventris Endlicheria paniculata</i>     | 10.08 | 0.384  | low | Bird-skewed  | 1 |
| <i>Tangara seledon Myrcia spectabilis</i>            | 10.07 | -0.163 | low | Plant-skewed | 1 |
| <i>Cissopis leverianus Psidium cattleianum</i>       | 10.04 | 0.549  | low | Bird-skewed  | 1 |
| <i>Cacicus haemorrhous Miconia cinnamomifolia</i>    | 10.03 | 0.850  | low | Bird-skewed  | 1 |
| <i>Chiroxiphia caudate Miconia tristis</i>           | 10.03 | 0.287  | low | Bird-skewed  | 2 |
| <i>Turdus rufiventris Eugenia astringens</i>         | 10.03 | 0.391  | low | Bird-skewed  | 1 |
| <i>Elaenia sp Ocotea pulchella</i>                   | 10.02 | 0.743  | low | Bird-skewed  | 1 |
| <i>Hemithraupis ruficapilla Miconia latecrenata</i>  | 10.02 | 0.214  | low | Bird-skewed  | 1 |
| <i>Turdus albicollis Paullinia uloptera</i>          | 10.02 | 0.679  | low | Bird-skewed  | 1 |
| <i>Chiroxiphia caudate Miconia pusilliflora</i>      | 9.98  | 0.296  | low | Bird-skewed  | 2 |
| <i>Turdus rufiventris Ossaea amygdaloides</i>        | 9.97  | 0.401  | low | Bird-skewed  | 1 |
| <i>Tachyphonus coronatus Miconia latecrenata</i>     | 9.96  | 0.206  | low | Bird-skewed  | 1 |
| <i>Thlypopsis sordida Miconia cinnamomifolia</i>     | 9.94  | 0.848  | low | Bird-skewed  | 1 |
| <i>Saltator similis Miconia tristis</i>              | 9.93  | 0.274  | low | Bird-skewed  | 1 |
| <i>Myiarchus ferox Miconia albicans</i>              | 9.92  | 0.103  | low | Bird-skewed  | 1 |
| <i>Turdus leucomelas Miconia albicans</i>            | 9.91  | 0.101  | low | Bird-skewed  | 1 |
| <i>Tangara cayana Miconia rubiginosa</i>             | 9.91  | 0.027  | low | Bird-skewed  | 1 |
| <i>Chiroxiphia caudate Solanum inodorum</i>          | 9.91  | 0.307  | low | Bird-skewed  | 1 |
| <i>Tachyphonus coronatus Ossaea sp</i>               | 9.91  | 0.217  | low | Bird-skewed  | 1 |
| <i>Chiroxiphia caudate Leandra variabilis</i>        | 9.90  | 0.310  | low | Bird-skewed  | 1 |
| <i>Turdus flavipes Paullinia uloptera</i>            | 9.89  | 0.673  | low | Bird-skewed  | 1 |
| <i>Turdus rufiventris Eugenia hiemalis</i>           | 9.89  | 0.413  | low | Bird-skewed  | 1 |
| <i>Turdus albicollis Marlierea obscura</i>           | 9.88  | 0.697  | low | Bird-skewed  | 1 |
| <i>Hemithraupis ruficapilla Miconia brasiliensis</i> | 9.88  | 0.240  | low | Bird-skewed  | 1 |
| <i>Saltator similis Miconia pusilliflora</i>         | 9.87  | 0.284  | low | Bird-skewed  | 1 |



|                                                      |      |        |     |              |   |
|------------------------------------------------------|------|--------|-----|--------------|---|
| <i>Turdus albicollis Miconia sellowiana</i>          | 9.84 | 0.702  | low | Bird-skewed  | 1 |
| <i>Hemithraupis ruficapilla Miconia racemifera</i>   | 9.84 | 0.247  | low | Bird-skewed  | 1 |
| <i>Dacnis cayana Myrcia splendens</i>                | 9.83 | 0.619  | low | Bird-skewed  | 3 |
| <i>Turdus rufiventris Ocotea puberula</i>            | 9.83 | 0.422  | low | Bird-skewed  | 1 |
| <i>Elaenia flavogaster Miconia sellowiana</i>        | 9.83 | 0.702  | low | Bird-skewed  | 1 |
| <i>Chiroxiphia caudate Leandra laevigata</i>         | 9.82 | 0.322  | low | Bird-skewed  | 1 |
| <i>Tachyphonus coronatus Miconia budlejoides</i>     | 9.82 | 0.231  | low | Bird-skewed  | 1 |
| <i>Ramphocelus bresilius Myrcia ferruginea</i>       | 9.82 | -0.060 | low | Plant-skewed | 1 |
| <i>Saltator similis Solanum inodorum</i>             | 9.81 | 0.295  | low | Bird-skewed  | 1 |
| <i>Tachyphonus coronatus Leandra australis</i>       | 9.80 | 0.235  | low | Bird-skewed  | 1 |
| <i>Saltator similis Leandra variabilis</i>           | 9.79 | 0.297  | low | Bird-skewed  | 1 |
| <i>Hemithraupis ruficapilla Miconia tristis</i>      | 9.79 | 0.256  | low | Bird-skewed  | 2 |
| <i>Tachyphonus coronatus Miconia racemifera</i>      | 9.78 | 0.239  | low | Bird-skewed  | 2 |
| <i>Tachyphonus coronatus Leandra acutiflora</i>      | 9.78 | 0.239  | low | Bird-skewed  | 1 |
| <i>Elaenia flavogaster Myrcia hebepectata</i>        | 9.76 | 0.711  | low | Bird-skewed  | 1 |
| <i>Chiroxiphia caudate Leandra sabiaensis</i>        | 9.74 | 0.336  | low | Bird-skewed  | 1 |
| <i>Chiroxiphia caudate Leandra refracta</i>          | 9.74 | 0.337  | low | Bird-skewed  | 1 |
| <i>Hemithraupis ruficapilla Miconia pusilliflora</i> | 9.73 | 0.266  | low | Bird-skewed  | 1 |
| <i>Tyrannus melancholicus Miconia rubiginosa</i>     | 9.73 | -0.009 | low | Plant-skewed | 1 |
| <i>Dacnis cayana Plinia cauliflora</i>               | 9.73 | 0.634  | low | Bird-skewed  | 1 |
| <i>Tachyphonus coronatus Miconia tristis</i>         | 9.73 | 0.248  | low | Bird-skewed  | 2 |
| <i>Tangara cayana Miconia albicans</i>               | 9.72 | 0.066  | low | Bird-skewed  | 1 |
| <i>Turdus flavipes Miconia sellowiana</i>            | 9.71 | 0.697  | low | Bird-skewed  | 1 |
| <i>Saltator similis Leandra sp</i>                   | 9.70 | 0.313  | low | Bird-skewed  | 1 |
| <i>Tachyphonus coronatus Miconia pusilliflora</i>    | 9.68 | 0.258  | low | Bird-skewed  | 2 |
| <i>Tangara seledon Ficus luschnathiana</i>           | 9.65 | -0.093 | low | Plant-skewed | 1 |
| <i>Ramphocelus carbo Miconia rubiginosa</i>          | 9.65 | -0.027 | low | Plant-skewed | 1 |
| <i>Turdus albicollis Ocotea pulchella</i>            | 9.64 | 0.730  | low | Bird-skewed  | 2 |
| <i>Elaenia flavogaster Ocotea pulchella</i>          | 9.63 | 0.729  | low | Bird-skewed  | 1 |
| <i>Chiroxiphia caudate Miconia elegans</i>           | 9.62 | 0.357  | low | Bird-skewed  | 1 |
| <i>Tachyphonus coronatus Leandra variabilis</i>      | 9.60 | 0.272  | low | Bird-skewed  | 1 |

|                                                    |      |        |     |              |   |
|----------------------------------------------------|------|--------|-----|--------------|---|
| <i>Chiroxiphia caudate Ossaea amygdaloides</i>     | 9.59 | 0.362  | low | Bird-skewed  | 1 |
| <i>Tangara preciosa Myrcia hartwegiana</i>         | 9.56 | 0.080  | low | Bird-skewed  | 1 |
| <i>Tyrannus melancholicus Miconia albicans</i>     | 9.54 | 0.031  | low | Bird-skewed  | 1 |
| <i>Tachyphonus coronatus Leandra laevigata</i>     | 9.52 | 0.285  | low | Bird-skewed  | 1 |
| <i>Turdus flavipes Ocotea pulchella</i>            | 9.51 | 0.725  | low | Bird-skewed  | 1 |
| <i>Tangara cyanocephala Psychotria gracilentia</i> | 9.51 | -0.452 | low | Plant-skewed | 1 |
| <i>Turdus leucomelas Miconia budlejoides</i>       | 9.49 | 0.183  | low | Bird-skewed  | 1 |
| <i>Saltator similis Ossaea amygdaloides</i>        | 9.49 | 0.350  | low | Bird-skewed  | 1 |
| <i>Thraupis sayaca Myrcia tomentosa</i>            | 9.48 | -0.585 | low | Plant-skewed | 1 |
| <i>Saltator similis Solanum variable</i>           | 9.47 | 0.353  | low | Bird-skewed  | 1 |
| <i>Tangara cayana Leandra aurea</i>                | 9.46 | 0.116  | low | Bird-skewed  | 1 |
| <i>Chiroxiphia caudate Ocotea puberula</i>         | 9.45 | 0.385  | low | Bird-skewed  | 1 |
| <i>Ramphocelus bresilius Miconia albicans</i>      | 9.45 | 0.014  | low | Bird-skewed  | 2 |
| <i>Trichothraupis melanops Miconia sellowiana</i>  | 9.45 | 0.686  | low | Bird-skewed  | 1 |
| <i>Tachyphonus coronatus Leandra sabiaensis</i>    | 9.44 | 0.300  | low | Bird-skewed  | 1 |
| <i>Tachyphonus coronatus Leandra refracta</i>      | 9.44 | 0.301  | low | Bird-skewed  | 1 |
| <i>Thraupis cyanopectera Myrcia pubipetala</i>     | 9.43 | -0.175 | low | Plant-skewed | 1 |
| <i>Turdus leucomelas Miconia tristis</i>           | 9.40 | 0.200  | low | Bird-skewed  | 1 |
| <i>Dacnis cayana Miconia sellowiana</i>            | 9.38 | 0.683  | low | Bird-skewed  | 1 |
| <i>Tachyphonus coronatus Eugenia astringens</i>    | 9.35 | 0.316  | low | Bird-skewed  | 1 |
| <i>Tangara cayana Miconia chartacea</i>            | 9.35 | 0.139  | low | Bird-skewed  | 2 |
| <i>Thraupis cyanopectera Ficus luschnathiana</i>   | 9.32 | -0.158 | low | Plant-skewed | 1 |
| <i>Dacnis cayana Myrcia hebeptala</i>              | 9.31 | 0.693  | low | Bird-skewed  | 1 |
| <i>Tachyphonus coronatus Leandra melastomoides</i> | 9.30 | 0.325  | low | Bird-skewed  | 1 |
| <i>Tangara cayana Miconia budlejoides</i>          | 9.29 | 0.150  | low | Bird-skewed  | 1 |
| <i>Tachyphonus coronatus Ossaea amygdaloides</i>   | 9.29 | 0.327  | low | Bird-skewed  | 1 |
| <i>Elaenia sp Miconia cinnamomifolia</i>           | 9.28 | 0.836  | low | Bird-skewed  | 1 |
| <i>Pipra rubrocapilla Miconia prasina</i>          | 9.28 | 0.817  | low | Bird-skewed  | 1 |
| <i>Pipra pipra Miconia prasina</i>                 | 9.28 | 0.817  | low | Bird-skewed  | 1 |
| <i>Saltator similis Solanum rufescens</i>          | 9.25 | 0.391  | low | Bird-skewed  | 1 |

|                                                    |      |        |     |              |   |
|----------------------------------------------------|------|--------|-----|--------------|---|
| <i>Turdus leucomelas Eugenia brasiliensis</i>      | 9.21 | 0.237  | low | Bird-skewed  | 1 |
| <i>Tangara cayana Miconia tristis</i>              | 9.20 | 0.169  | low | Bird-skewed  | 1 |
| <i>Pipra rubrocapilla Miconia cinnamomifolia</i>   | 9.15 | 0.833  | low | Bird-skewed  | 1 |
| <i>Pipra pipra Miconia cinnamomifolia</i>          | 9.15 | 0.833  | low | Bird-skewed  | 1 |
| <i>Dacnis cayana Eugenia uniflora</i>              | 9.07 | 0.726  | low | Bird-skewed  | 1 |
| <i>Tangara cyanocephala Miconia valtheri</i>       | 9.02 | -0.405 | low | Plant-skewed | 1 |
| <i>Tyrannus melancholicus Miconia tristis</i>      | 9.02 | 0.138  | low | Bird-skewed  | 1 |
| <i>Turdus leucomelas Eugenia astringens</i>        | 9.02 | 0.273  | low | Bird-skewed  | 1 |
| <i>Tangara seledon Miconia latecrenata</i>         | 9.00 | 0.039  | low | Bird-skewed  | 1 |
| <i>Turdus albicollis Miconia cubatanensis</i>      | 8.97 | 0.818  | low | Bird-skewed  | 1 |
| <i>Turdus rufiventris Myrcia splendens</i>         | 8.95 | 0.565  | low | Bird-skewed  | 2 |
| <i>Thraupis sp Eugenia astringens</i>              | 8.90 | 0.256  | low | Bird-skewed  | 1 |
| <i>Turdus albicollis Miconia cinnamomifolia</i>    | 8.89 | 0.828  | low | Bird-skewed  | 1 |
| <i>Turdus flavipes Miconia prasina</i>             | 8.89 | 0.808  | low | Bird-skewed  | 1 |
| <i>Tangara seledon Miconia budlejoides</i>         | 8.86 | 0.070  | low | Bird-skewed  | 1 |
| <i>Turdus flavipes Miconia cubatanensis</i>        | 8.84 | 0.814  | low | Bird-skewed  | 1 |
| <i>Turdus flavipes Miconia cabucu</i>              | 8.84 | 0.814  | low | Bird-skewed  | 1 |
| <i>Tangara cyanoptera Eugenia uniflora</i>         | 8.82 | 0.716  | low | Bird-skewed  | 1 |
| <i>Tangara seledon Miconia racemifera</i>          | 8.82 | 0.079  | low | Bird-skewed  | 1 |
| <i>Turdus flavipes Miconia cinnamomifolia</i>      | 8.76 | 0.825  | low | Bird-skewed  | 1 |
| <i>Tangara seledon Miconia tristis</i>             | 8.76 | 0.090  | low | Bird-skewed  | 1 |
| <i>Ramphocelus carbo Eugenia brasiliensis</i>      | 8.74 | 0.163  | low | Bird-skewed  | 1 |
| <i>Saltator similis Solanum argenteum</i>          | 8.71 | 0.485  | low | Bird-skewed  | 1 |
| <i>Tangara seledon Miconia pusilliflora</i>        | 8.71 | 0.102  | low | Bird-skewed  | 2 |
| <i>Turdus leucomelas Solanum granulosoleprosum</i> | 8.70 | 0.335  | low | Bird-skewed  | 1 |
| <i>Schistochlamys ruficapillus Leandra aurea</i>   | 8.63 | -0.057 | low | Plant-skewed | 1 |
| <i>Thraupis cyanoptera Miconia chartacea</i>       | 8.59 | -0.015 | low | Plant-skewed | 1 |
| <i>Ramphocelus bresilius Eugenia astringens</i>    | 8.56 | 0.202  | low | Bird-skewed  | 1 |
| <i>Dacnis cayana Miconia prasina</i>               | 8.55 | 0.799  | low | Bird-skewed  | 1 |
| <i>Elaenia mesoleuca Myrciaria floribunda</i>      | 8.55 | 0.564  | low | Bird-skewed  | 1 |

|                                                       |      |        |     |              |   |
|-------------------------------------------------------|------|--------|-----|--------------|---|
| <i>Tangara seledon Leandra sp</i>                     | 8.54 | 0.140  | low | Bird-skewed  | 1 |
| <i>Thraupis cyanoptera Miconia budlejoides</i>        | 8.53 | -0.001 | low | Plant-skewed | 1 |
| <i>Schistochlamys ruficapillus Miconia chartacea</i>  | 8.51 | -0.032 | low | Plant-skewed | 2 |
| <i>Tachyphonus coronatus Solanum mauritianum</i>      | 8.51 | 0.467  | low | Bird-skewed  | 1 |
| <i>Dacnis cayana Miconia cabucu</i>                   | 8.51 | 0.806  | low | Bird-skewed  | 1 |
| <i>Trichothraupis melanops Miconia cinnamomifolia</i> | 8.50 | 0.818  | low | Bird-skewed  | 2 |
| <i>Tangara cayana Solanum granulosoleprosum</i>       | 8.50 | 0.308  | low | Bird-skewed  | 1 |
| <i>Turdus rufiventris Miconia sellowiana</i>          | 8.49 | 0.638  | low | Bird-skewed  | 1 |
| <i>Tangara cyanocephala Miconia theizans</i>          | 8.49 | -0.343 | low | Plant-skewed | 1 |
| <i>Myiarchus swainsoni Myrcia splendens</i>           | 8.48 | 0.530  | low | Bird-skewed  | 1 |
| <i>Saltator similis Myrcia splendens</i>              | 8.46 | 0.528  | low | Bird-skewed  | 1 |
| <i>Tangara cyanocephala Miconia inconspicua</i>       | 8.45 | -0.338 | low | Plant-skewed | 1 |
| <i>Tyrannus melancholicus Nectandra cuspidata</i>     | 8.44 | 0.257  | low | Bird-skewed  | 1 |
| <i>Thraupis cyanoptera Miconia tristis</i>            | 8.44 | 0.020  | low | Bird-skewed  | 1 |
| <i>Tangara cyanocephala Myrcia ferruginea</i>         | 8.43 | -0.335 | low | Plant-skewed | 1 |
| <i>Dacnis cayana Miconia cinnamomifolia</i>           | 8.43 | 0.816  | low | Bird-skewed  | 3 |
| <i>Tangara cyanocephala Ficus luschnathiana</i>       | 8.43 | -0.335 | low | Plant-skewed | 1 |
| <i>Thraupis ornate Myrcia pubipetala</i>              | 8.43 | -0.369 | low | Plant-skewed | 1 |
| <i>Turdus rufiventris Myrcia brasiliensis</i>         | 8.42 | 0.649  | low | Bird-skewed  | 1 |
| <i>Thraupis sayaca Myrcia palustris</i>               | 8.42 | -0.507 | low | Plant-skewed | 1 |
| <i>Thraupis cyanoptera Miconia pusilliflora</i>       | 8.38 | 0.033  | low | Bird-skewed  | 2 |
| <i>Thraupis ornate Miconia theizans</i>               | 8.38 | -0.364 | low | Plant-skewed | 1 |
| <i>Tangara seledon Leandra pilonensis</i>             | 8.36 | 0.179  | low | Bird-skewed  | 1 |
| <i>Thraupis cyanoptera Solanum inodorum</i>           | 8.32 | 0.048  | low | Bird-skewed  | 1 |
| <i>Turdus rufiventris Ocotea pulchella</i>            | 8.28 | 0.671  | low | Bird-skewed  | 2 |
| <i>Tachyphonus coronatus Myrcia splendens</i>         | 8.27 | 0.512  | low | Bird-skewed  | 1 |
| <i>Thraupis sayaca Myrcia spectabilis</i>             | 8.26 | -0.493 | low | Plant-skewed | 1 |
| <i>Elaenia mesoleuca Miconia sellowiana</i>           | 8.21 | 0.621  | low | Bird-skewed  | 1 |
| <i>Turdus rufiventris Eugenia cerasiflora</i>         | 8.19 | 0.687  | low | Bird-skewed  | 1 |
| <i>Tachyphonus coronatus Plinia cauliflora</i>        | 8.16 | 0.530  | low | Bird-skewed  | 1 |

|                                                    |      |        |     |              |   |
|----------------------------------------------------|------|--------|-----|--------------|---|
| <i>Tangara desmaresti Miconia valtheri</i>         | 8.13 | -0.563 | low | Plant-skewed | 1 |
| <i>Thraupis sayaca Myrcia oblongata</i>            | 8.08 | -0.476 | low | Plant-skewed | 1 |
| <i>Tangara cyanocephala Miconia albicans</i>       | 8.06 | -0.283 | low | Plant-skewed | 1 |
| <i>Thraupis cyanoptera Eugenia astringens</i>      | 8.06 | 0.109  | low | Bird-skewed  | 1 |
| <i>Thraupis cyanoptera Leandra xanthocoma</i>      | 8.06 | 0.110  | low | Bird-skewed  | 1 |
| <i>Chiroxiphia caudate Myrcia hebeptala</i>        | 8.04 | 0.626  | low | Bird-skewed  | 1 |
| <i>Saltator similis Miconia sellowiana</i>         | 8.01 | 0.607  | low | Bird-skewed  | 1 |
| <i>Tangara mexicana Miconia prasina</i>            | 8.00 | 0.782  | low | Bird-skewed  | 1 |
| <i>Thraupis cyanoptera Eugenia melanogyna</i>      | 8.00 | 0.123  | low | Bird-skewed  | 1 |
| <i>Turdus leucomelas Myrcia splendens</i>          | 7.93 | 0.481  | low | Bird-skewed  | 1 |
| <i>Trichothraupis melanops Miconia minutiflora</i> | 7.93 | 0.897  | low | Bird-skewed  | 1 |
| <i>Thraupis palmarum Miconia albicans</i>          | 7.91 | -0.314 | low | Plant-skewed | 1 |
| <i>Tangara mexicana Miconia cinnamomifolia</i>     | 7.88 | 0.801  | low | Bird-skewed  | 1 |
| <i>Thraupis sayaca Myrcia ferruginea</i>           | 7.84 | -0.451 | low | Plant-skewed | 1 |
| <i>Turdus leucomelas Plinia cauliflora</i>         | 7.83 | 0.500  | low | Bird-skewed  | 1 |
| <i>Tachyphonus coronatus Miconia sellowiana</i>    | 7.81 | 0.593  | low | Bird-skewed  | 1 |
| <i>Tangara cyanocephala Miconia latecrenata</i>    | 7.78 | -0.236 | low | Plant-skewed | 1 |
| <i>Tachyphonus coronatus Myrcia hebeptala</i>      | 7.74 | 0.606  | low | Bird-skewed  | 1 |
| <i>Ramphocelus carbo Solanum mauritianum</i>       | 7.72 | 0.378  | low | Bird-skewed  | 1 |
| <i>Tangara seledon Siphoneugena densiflora</i>     | 7.71 | 0.320  | low | Bird-skewed  | 1 |
| <i>Thraupis episcopus Miconia rubiginosa</i>       | 7.66 | -0.433 | low | Plant-skewed | 1 |
| <i>Tangara cyanocephala Miconia budlejoides</i>    | 7.64 | -0.211 | low | Plant-skewed | 1 |
| <i>Tangara cayana Plinia cauliflora</i>            | 7.63 | 0.481  | low | Bird-skewed  | 1 |
| <i>Tangara cyanocephala Miconia brasiliensis</i>   | 7.63 | -0.210 | low | Plant-skewed | 1 |
| <i>Tangara cyanocephala Leandra australis</i>      | 7.62 | -0.208 | low | Plant-skewed | 1 |
| <i>Tangara desmaresti Miconia theizans</i>         | 7.60 | -0.517 | low | Plant-skewed | 1 |
| <i>Tangara cyanocephala Miconia racemifera</i>     | 7.59 | -0.203 | low | Plant-skewed | 2 |
| <i>Thraupis ornate Miconia chartacea</i>           | 7.59 | -0.247 | low | Plant-skewed | 1 |
| <i>Tangara preciosa Calyptranthes concinna</i>     | 7.57 | 0.479  | low | Bird-skewed  | 1 |
| <i>Tyrannus melancholicus Myrcia splendens</i>     | 7.56 | 0.440  | low | Bird-skewed  | 1 |
| <i>Tangara cyanocephala Miconia tristis</i>        | 7.54 | -0.194 | low | Plant-skewed | 1 |

|                                                               |      |        |     |              |   |
|---------------------------------------------------------------|------|--------|-----|--------------|---|
| <i>Turdus rufiventris</i> <i>Miconia cinnamomifolia</i>       | 7.54 | 0.790  | low | Bird-skewed  | 2 |
| <i>Tangara desmaresti</i> <i>Ficus luschnathiana</i>          | 7.53 | -0.511 | low | Plant-skewed | 1 |
| <i>Thraupis ornate</i> <i>Miconia budlejoides</i>             | 7.53 | -0.236 | low | Plant-skewed | 1 |
| <i>Thraupis ornate</i> <i>Miconia brasiliensis</i>            | 7.52 | -0.236 | low | Plant-skewed | 1 |
| <i>Tangara cyanocephala</i> <i>Miconia pusilliflora</i>       | 7.49 | -0.183 | low | Plant-skewed | 2 |
| <i>Thraupis ornate</i> <i>Miconia racemifera</i>              | 7.49 | -0.229 | low | Plant-skewed | 1 |
| <i>Thraupis sayaca</i> <i>Miconia albicans</i>                | 7.47 | -0.407 | low | Plant-skewed | 2 |
| <i>Ramphocelus bresilius</i> <i>Myrcia splendens</i>          | 7.47 | 0.430  | low | Bird-skewed  | 2 |
| <i>Thraupis ornate</i> <i>Miconia tristis</i>                 | 7.43 | -0.219 | low | Plant-skewed | 2 |
| <i>Tangara cyanocephala</i> <i>Leandra variabilis</i>         | 7.41 | -0.167 | low | Plant-skewed | 1 |
| <i>Thraupis palmarum</i> <i>Miconia tristis</i>               | 7.39 | -0.229 | low | Plant-skewed | 1 |
| <i>Thraupis ornate</i> <i>Miconia pusilliflora</i>            | 7.38 | -0.209 | low | Plant-skewed | 2 |
| <i>Ramphocelus carbo</i> <i>Plinia cauliflora</i>             | 7.37 | 0.452  | low | Bird-skewed  | 1 |
| <i>Tangara cyanoventris</i> <i>Miconia tentaculifera</i>      | 7.33 | -0.493 | low | Plant-skewed | 1 |
| <i>Tangara cyanocephala</i> <i>Leandra sp</i>                 | 7.32 | -0.147 | low | Plant-skewed | 1 |
| <i>Tangara cayana</i> <i>Miconia sellowiana</i>               | 7.28 | 0.550  | low | Bird-skewed  | 1 |
| <i>Chiroxiphia caudate</i> <i>Miconia cabucu</i>              | 7.24 | 0.764  | low | Bird-skewed  | 1 |
| <i>Chiroxiphia caudate</i> <i>Miconia cubatanensis</i>        | 7.24 | 0.764  | low | Bird-skewed  | 1 |
| <i>Thraupis cyanopectera</i> <i>Solanum mauritianum</i>       | 7.22 | 0.306  | low | Bird-skewed  | 1 |
| <i>Turdus leucomelas</i> <i>Eugenia uniflora</i>              | 7.17 | 0.626  | low | Bird-skewed  | 3 |
| <i>Tangara desmaresti</i> <i>Miconia albicans</i>             | 7.17 | -0.473 | low | Plant-skewed | 1 |
| <i>Chiroxiphia caudate</i> <i>Miconia cinnamomifolia</i>      | 7.16 | 0.777  | low | Bird-skewed  | 2 |
| <i>Tangara cyanocephala</i> <i>Ossaea amygdaloides</i>        | 7.10 | -0.099 | low | Plant-skewed | 1 |
| <i>Saltator similis</i> <i>Miconia cinnamomifolia</i>         | 7.06 | 0.773  | low | Bird-skewed  | 1 |
| <i>Thraupis palmarum</i> <i>Eugenia astringens</i>            | 7.01 | -0.152 | low | Plant-skewed | 1 |
| <i>Tachyphonus coronatus</i> <i>Miconia prasina</i>           | 6.99 | 0.742  | low | Bird-skewed  | 1 |
| <i>Thraupis cyanopectera</i> <i>Myrcia splendens</i>          | 6.98 | 0.364  | low | Bird-skewed  | 1 |
| <i>Thraupis episcopus</i> <i>Miconia tristis</i>              | 6.95 | -0.336 | low | Plant-skewed | 1 |
| <i>Hemithraupis ruficapilla</i> <i>Miconia cinnamomifolia</i> | 6.92 | 0.767  | low | Bird-skewed  | 1 |
| <i>Tangara desmaresti</i> <i>Leandra aurea</i>                | 6.91 | -0.443 | low | Plant-skewed | 1 |

|                                                        |      |        |     |              |   |
|--------------------------------------------------------|------|--------|-----|--------------|---|
| <i>Tyrannus melancholicus Ocotea pulchella</i>         | 6.89 | 0.577  | low | Bird-skewed  | 1 |
| <i>Tangara desmaresti Miconia latecrenata</i>          | 6.88 | -0.439 | low | Plant-skewed | 1 |
| <i>Tachyphonus coronatus Miconia cinnamomifolia</i>    | 6.86 | 0.764  | low | Bird-skewed  | 2 |
| <i>Tangara desmaresti Miconia chartacea</i>            | 6.80 | -0.428 | low | Plant-skewed | 2 |
| <i>Thraupis episcopus Eugenia brasiliensis</i>         | 6.76 | -0.305 | low | Plant-skewed | 1 |
| <i>Hemithraupis flavicollis Miconia cinnamomifolia</i> | 6.75 | 0.759  | low | Bird-skewed  | 1 |
| <i>Tangara desmaresti Miconia budlejoides</i>          | 6.74 | -0.420 | low | Plant-skewed | 2 |
| <i>Tangara desmaresti Leandra australis</i>            | 6.72 | -0.418 | low | Plant-skewed | 1 |
| <i>Ramphocelus carbo Eugenia uniflora</i>              | 6.71 | 0.590  | low | Bird-skewed  | 2 |
| <i>Tangara desmaresti Miconia racemifera</i>           | 6.70 | -0.415 | low | Plant-skewed | 1 |
| <i>Myiarchus ferox Miconia prasina</i>                 | 6.66 | 0.726  | low | Bird-skewed  | 1 |
| <i>Tangara desmaresti Miconia tristis</i>              | 6.65 | -0.407 | low | Plant-skewed | 2 |
| <i>Tangara desmaresti Miconia pusilliflora</i>         | 6.60 | -0.400 | low | Plant-skewed | 2 |
| <i>Thraupis sayaca Solanum myrianthum</i>              | 6.59 | -0.269 | low | Plant-skewed | 1 |
| <i>Thraupis sayaca Eugenia astringens</i>              | 6.58 | -0.267 | low | Plant-skewed | 1 |
| <i>Thraupis sayaca Miconia elegans</i>                 | 6.55 | -0.261 | low | Plant-skewed | 1 |
| <i>Turdus leucomelas Miconia cinnamomifolia</i>        | 6.53 | 0.749  | low | Bird-skewed  | 2 |
| <i>Thraupis cyanoptera Miconia sellowiana</i>          | 6.52 | 0.470  | low | Bird-skewed  | 1 |
| <i>Tangara desmaresti Leandra variabilis</i>           | 6.52 | -0.388 | low | Plant-skewed | 1 |
| <i>Thraupis cyanoptera Myrcia hebeptala</i>            | 6.45 | 0.487  | low | Bird-skewed  | 1 |
| <i>Tangara desmaresti Leandra sp</i>                   | 6.42 | -0.373 | low | Plant-skewed | 1 |
| <i>Tangara cayana Miconia cinnamomifolia</i>           | 6.33 | 0.740  | low | Bird-skewed  | 2 |
| <i>Tyrannus melancholicus Miconia prasina</i>          | 6.28 | 0.704  | low | Bird-skewed  | 1 |
| <i>Thraupis episcopus Solanum granulosoleprosum</i>    | 6.24 | -0.203 | low | Plant-skewed | 1 |
| <i>Tangara desmaresti Leandra pilonensis</i>           | 6.24 | -0.343 | low | Plant-skewed | 1 |
| <i>Ramphocelus bresilius Miconia prasina</i>           | 6.19 | 0.699  | low | Bird-skewed  | 1 |
| <i>Tyrannus melancholicus Miconia cinnamomifolia</i>   | 6.15 | 0.730  | low | Bird-skewed  | 1 |

|                                                     |      |        |     |              |   |
|-----------------------------------------------------|------|--------|-----|--------------|---|
| <i>Tangara cyanocephala Myrcia splendens</i>        | 6.08 | 0.194  | low | Bird-skewed  | 2 |
| <i>Ramphocelus bresilius Miconia cinnamomifolia</i> | 6.07 | 0.725  | low | Bird-skewed  | 1 |
| <i>Tangara seledon Miconia cabucu</i>               | 5.97 | 0.698  | low | Bird-skewed  | 1 |
| <i>Thraupis ornate Myrcia splendens</i>             | 5.97 | 0.168  | low | Bird-skewed  | 1 |
| <i>Thraupis palmarum Myrcia splendens</i>           | 5.93 | 0.157  | low | Bird-skewed  | 2 |
| <i>Thraupis sayaca Psidium cattleianum</i>          | 5.90 | -0.109 | low | Plant-skewed | 1 |
| <i>Tangara seledon Miconia cinnamomifolia</i>       | 5.90 | 0.715  | low | Bird-skewed  | 2 |
| <i>Tangara cayana Miconia ligustroides</i>          | 5.76 | 0.853  | low | Bird-skewed  | 1 |
| <i>Thraupis episcopus Solanum mauritianum</i>       | 5.73 | -0.064 | low | Plant-skewed | 1 |
| <i>Thraupis cyanoptera Miconia cabucu</i>           | 5.65 | 0.675  | low | Bird-skewed  | 1 |
| <i>Thraupis cyanoptera Miconia cinnamomifolia</i>   | 5.57 | 0.693  | low | Bird-skewed  | 2 |
| <i>Thraupis ornate Miconia sellowiana</i>           | 5.52 | 0.307  | low | Bird-skewed  | 2 |
| <i>Thraupis sayaca Myrcia splendens</i>             | 5.49 | 0.025  | low | Bird-skewed  | 1 |
| <i>Thraupis sayaca Plinia cauliflora</i>            | 5.39 | 0.062  | low | Bird-skewed  | 1 |
| <i>Thraupis episcopus Plinia cauliflora</i>         | 5.38 | 0.058  | low | Bird-skewed  | 1 |
| <i>Thraupis sayaca Marlierea obscura</i>            | 5.08 | 0.173  | low | Bird-skewed  | 1 |
| <i>Thraupis sayaca Miconia sellowiana</i>           | 5.04 | 0.188  | low | Bird-skewed  | 1 |
| <i>Thraupis sayaca Ocotea pulchella</i>             | 4.83 | 0.263  | low | Bird-skewed  | 1 |
| <i>Tangara cyanocephala Miconia cabucu</i>          | 4.75 | 0.589  | low | Bird-skewed  | 1 |
| <i>Tangara cyanocephala Miconia cubatanensis</i>    | 4.75 | 0.589  | low | Bird-skewed  | 1 |
| <i>Thraupis sayaca Eugenia cerasiflora</i>          | 4.73 | 0.298  | low | Bird-skewed  | 1 |
| <i>Tangara desmaresti Miconia sellowiana</i>        | 4.73 | 0.087  | low | Bird-skewed  | 2 |
| <i>Thraupis episcopus Eugenia uniflora</i>          | 4.72 | 0.295  | low | Bird-skewed  | 3 |
| <i>Tangara cyanocephala Miconia cinnamomifolia</i>  | 4.67 | 0.611  | low | Bird-skewed  | 3 |
| <i>Thraupis palmarum Miconia prasina</i>            | 4.65 | 0.555  | low | Bird-skewed  | 1 |
| <i>Thraupis ornate Miconia cinnamomifolia</i>       | 4.57 | 0.599  | low | Bird-skewed  | 2 |
| <i>Thraupis palmarum Miconia cinnamomifolia</i>     | 4.53 | 0.594  | low | Bird-skewed  | 1 |
| <i>Thraupis sayaca Miconia prasina</i>              | 4.21 | 0.485  | low | Bird-skewed  | 1 |
| <i>Thraupis sayaca Miconia cinnamomifolia</i>       | 4.09 | 0.530  | low | Bird-skewed  | 2 |
| <i>Tangara desmaresti Miconia cinnamomifolia</i>    | 3.78 | 0.471  | low | Bird-skewed  | 2 |
| <i>Tangara cyanoventris Miconia cinnamomifolia</i>  | 3.77 | 0.469  | low | Bird-skewed  | 1 |



*Thraupis sayaca Miconia ligustroides*

3.52

0.734

low

Bird-skewed

1

---
